1     **The dynamic transition between neural states is associated with the**  
2                                   **flexible use of memory**

3  
4     Wei Liu<sup>1</sup>, Nils Kohn<sup>1</sup>, Guillén Fernández<sup>1</sup>

5  
6         1. Donders Institute for Brain, Cognition and Behaviour, Radboud University Medical Centre,  
7             Nijmegen, The Netherlands

8  
9  
10    Introduction: 650 words

11    Discussion: 1338 words

12  
13  
14    **Correspondence:**

15    Wei Liu

16    Department of Cognitive Neuroscience

17    Donders Institute for Brain, Cognition and Behaviour

18    Radboud University Medical Centre

19    Trigon Building, Kapittelweg 29

20    6525 EN Nijmegen, The Netherlands

21    Tel: +31 (0)24 36 53276

22    E-mail: W.Liu@donders.ru.nl

23

1 **Abstract**

2 Flexible behavior requires switching between different task demands. It is known that such task-switching

3 is associated with costs in terms of slowed reaction time, reduced accuracy, or both. The neural correlates

4 of task-switching have usually been studied by requiring participants to switch between distinct tasks that

5 recruit different brain networks. Here, we investigated the transition of neural states underlying switching

6 between two memory-related processes with opposite task demands (i.e., memory retrieval and memory

7 suppression). We investigated 26 healthy participants who performed a Think/No-Think task while being

8 in the fMRI scanner. Behaviorally, we show that it was more difficult for participants to suppress

9 unwanted memories when a No-Think was preceded by a Think trial instead of another No-Think trial.

10 Neurally, we demonstrate that Think-to-No-Think switches were associated with an increase in control-

11 related and a decrease in memory-related brain activity. Neural representations of task demand, assessed

12 by decoding accuracy, were lower immediately after task switching compared to the non-switch

13 transitions, suggesting a switch-induced delay in the neural transition towards the required task demand.

14 This suggestion is corroborated by an association between demand-specific representational strength and

15 demand-specific performance in switch trials. Taken together, we propose that the brain's delayed

16 transition of neural states towards the task demand at hand is associated with a switch cost leading to less

17 successful memory suppression.

18 **Keywords:** task switching; memory suppression; memory retrieval; cognitive control; fMRI

19

20

21

22

23

1  
2  
3  
4  
5  
6  
7  
8  
9  
10  
11  
12  
13  
14  
15  
16  
17  
18  
19  
20  
21

## Significance statement

Our brain can switch between multiple tasks but at the cost of less optimal performance during transition. One possible neuroscientific explanation is that the representation of task demand is not easy to be updated immediately after switching. Thus, weak representations for the task at hand explain performance costs. To test this, we applied brain decoding approaches to human fMRI data when participants switched between successive trials of memory retrieval and suppression. We found that switching leads to a weaker representation of the current task. The remaining representation of the previous, opposite task is associated with inferior performance in the current task. Therefore, timely updating of task representations is critical for the task switching in the service of flexible behaviors.

## 1 **Introduction**

2 In everyday life, we are continuously switching between different tasks (Monsell, 2003). Transitions  
3 between task demands have often been studied using task-switching paradigms in which participants are  
4 required to switch between two or more distinct tasks (Meiran, 2010). Usually, participants perform less  
5 accurately and/or more slowly immediately after switches (i.e., *switch costs*) (Jersild, 1927; Spector and  
6 Biederman, 1976; Rogers and Monsell, 1995; Goschke, 2000). Results from univariate fMRI studies  
7 suggested the involvement of prefrontal-parietal regions in task switching (Dove et al., 2000; Braver et al.,  
8 2003; Gruber et al., 2006; Richter and Yeung, 2014). Two studies (Waskom et al., 2014; Loose et al.,  
9 2017) used multivariate fMRI methods (Haynes, 2015; Cohen et al., 2017) to investigate how task  
10 switching modulates task representations but reported mixed results. Waskom and colleagues reported  
11 stronger task representations after a shift in task demands (Waskom et al., 2014), while Loose and  
12 colleagues found no difference in task representations between the switch and the non-switch condition  
13 (Loose et al., 2017).

14 Previous experiments that investigated task switching were typically designed to minimize the perceptual  
15 differences between conditions, but not to maximize differences in underlying cognitive demands (Braver  
16 et al., 2003; Kiesel et al., 2010; Waskom et al., 2014; Loose et al., 2017). Behavioral and neural correlates  
17 of task-switching between two opposite tasks within one cognitive domain remain largely unexplored.  
18 Switching between two opposite task demands should be cognitively more challenging than between  
19 unrelated tasks, because they may be based on (partly) overlapping neural mechanisms. More importantly,  
20 it provides us with the opportunity to examine the fast-adaptive transition between task demands  
21 represented in the neural states of the same brain networks in response to switches. Here, we used a  
22 modified Think/No-Think paradigm (Anderson and Green, 2001; Levy and Anderson, 2012) to probe  
23 task-switching within the memory domain. Specifically, participants were instructed to switch between  
24 memory retrieval and memory suppression according to trial-specific instructions. We asked whether we  
25 can find behavioral *switch costs* when participants switch between two opposite memory tasks.

1 To detect the neural source of *switch costs*, we analyzed the dynamic transitions between neural states  
2 during task switching using time-resolved multivariate decoding. Our analyses focused on frontoparietal  
3 regions associated with control and a set of regions associated with memory retrieval. Cognitive and  
4 neural models of memory retrieval and suppression suggest that successful retrieval could be the result of  
5 cooperation between an inhibitory control network and an episodic retrieval network (Rugg and Vilberg,  
6 2013), while effective suppression depends on top-down control of the inhibitory control network upon a  
7 general episodic retrieval network (Anderson and Hanslmayr, 2014). Previous fMRI studies of memory  
8 suppression supported this idea by showing that compared to Think trials, No-Think trials are associated  
9 with stronger activation in control-related regions including the dorsolateral prefrontal cortex,  
10 ventrolateral prefrontal cortex, inferior parietal lobule, and supplementary motor area (Anderson, 2004;  
11 Guo et al., 2018; Liu et al., 2020b). At the same time, these activity increases are accompanied by reduced  
12 activity in memory-related areas in the medial temporal lobe, including the hippocampus (Anderson and  
13 Hanslmayr, 2014).

14 We hypothesized that a delayed transition between neural states that represent task demands could be the  
15 neural underpinning of behavioral *switch costs* because failing to update neural states on time could result  
16 in a neural state that is optimal for the opposite (e.g., retrieval), but not the current (e.g., suppression), task  
17 demand. This assumption is built on the idea that the human brain can demonstrate diverse brain states  
18 during different cognitive tasks or environmental demands (Hermans et al., 2011; Gonzalez-Castillo et al.,  
19 2015; Sadaghiani et al., 2015; Shine et al., 2016; Westphal et al., 2017; Shine and Poldrack, 2018;  
20 Cocuzza et al., 2019). The task-switching paradigm is suitable to study such a rapid neural reconfiguration  
21 process because it allows us to compare directly how different task demands are represented in neural  
22 states and how transitions of neural states are associated with switch costs.

23

24

## 1 **Results**

### 2 **Behavioral results**

3 Our study used a modified think/no-think (TNT) paradigm (**Figure 1A**) with trial-by-trial reports of  
4 (in)voluntary memory retrieval (i.e., retrieval/intrusion frequency rating) (Levy and Anderson, 2012). As  
5 intended, most of the associations were successfully recalled in Think trials (1-mean  $p_{(\text{Never})}$ =84.05%,  
6 SD=11.79 %, range from 56.25% to 100%; **Figure S1A**), while participants suppressed memory retrieval  
7 successfully in No-Think trials in about half of the trials (mean  $p_{(\text{Never})}$ =50.62%, SD=25.35%, range from 4%  
8 to 92.5%; **Figure S1B**).

9 Our central aim was to determine whether there were behavioral *switch costs* in the TNT task and to  
10 reveal their neural underpinnings. We defined each trial as a “switch” or “non-switch” trial considering  
11 both the task demand of the current trial and its predecessor (**Figure 1B**). Specifically, we identified  
12 “switch” trials if a preceding trial had the *opposite* task demand (e.g., previous trial: Think; current trial:  
13 No-Think). By contrast, if the current trial and the preceding trial had the *same* task demand, then the  
14 current one was a “non-switch” trial. We compared the trial-by-trial performance between “switch” and  
15 “non-switch” trials for the Think and the No-Think condition separately. Participants showed comparable  
16 performance for “switch” and “non-switch” trials in the Think condition ( $t(25)=0.348$ ,  $p=0.731$ , Cohen’s  
17  $d=0.068$ ; **Figure 1C**), while they reported more memory intrusions for “switch” trials compared to “non-  
18 switch” trials in the No-Think condition ( $t(25)=3.19$ ,  $p=0.004$ , Cohen’s  $d=0.627$ ; **Figure 1D**), suggesting  
19 *switch costs* when the task demand switched from a previous Think trial to a current No-Think trial.

20 After the TNT task, participants performed a final memory test. Results from this task had been reported  
21 in another publication in detail (Liu et al., 2020a) and *supplemental materials* (**Figure S2**) of this study.  
22 Here, we focused on participants’ performance during the final memory test at the individual level. More  
23 specifically, we quantified individual differences in both subjective and objective *suppression-induced*  
24 *forgetting effects* and correlated them with fMRI measures (*see below*).

## 1 **fMRI results**

2 To replicate the univariate neural signature of memory suppression reported in prior studies (Anderson,  
3 2004; Anderson and Hanslmayr, 2014), we first conducted a univariate analysis to contrast brain regions  
4 engaged in memory suppression and memory retrieval (i.e., No-Think vs. Think). We found an increased  
5 activity for No-Think trials in regions that are consistently involved in memory suppression, including the  
6 bilateral dorsolateral prefrontal cortex (DLPFC), bilateral insula, bilateral inferior parietal lobule (IPL),  
7 supplementary motor area (SMA), and middle cingulate gyrus (**Figure 1E; Table S1**). Additionally, we  
8 found higher activity in ventral visual areas and the right thalamus during No-Think compared to Think  
9 trials. Next, we contrasted the Think condition with the No-Think condition and found the increased  
10 activity for Think condition in a set of regions including the medial prefrontal cortex (mPFC), posterior  
11 cingulate cortex (PCC), hippocampus, inferior parietal lobule (IPL), precuneus, angular gyrus, and  
12 cerebellum (**Figure 1F; Table S2**). Together with the behavioral results from the final memory test, these  
13 results confirmed that participants in our experiment followed task instructions, leading to univariate  
14 neural signatures of memory retrieval and suppression consistent with prior findings (Anderson, 2004;  
15 Levy and Anderson, 2012; Hulbert et al., 2016), as well as recent meta-analyses of memory suppression  
16 (Guo et al., 2018; Liu et al., 2020b).

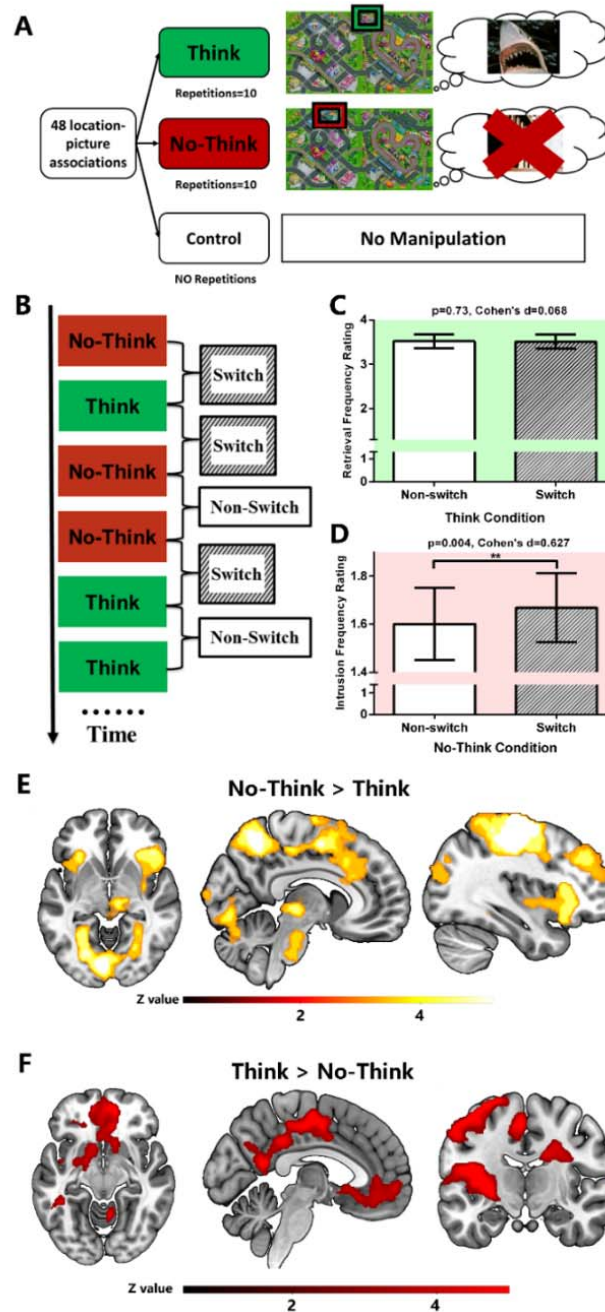

1

2 **Figure 1** (A) After learning 48 location-picture associations, participants performed a Think/No-Think task while  
 3 brain activity was measured by fMRI. During think trials, participants were instructed to retrieve associated pictures  
 4 based on the highlighted locations as memory cues. By contrast, during no-think trials, participants were required to  
 5 suppress the tendency to retrieve the associated pictures. (B) The sequence of trials was designed to probe task  
 6 switching between two task demands (i.e., Think and No-Think). When the task demand of the current trial was the  
 7 same as the previous trial, it was defined as the “Non-switch” trial. By contrast, while the task demand of the current  
 8 differed from the previous trial, it was defined as the “switch” trial. (C) During Think trials, participants  
 9 demonstrated comparable memory retrieval performance ( $p=0.73$ , Cohen's  $d=0.068$ ) for both “switch” and “Non-  
 10 switch” trials. (D) During No-Think trials, participants reported worse memory suppression performance, indexed by  
 11 more memory intrusions for “switch” trials compared to “non-switch” trials ( $p=0.004$ , Cohen's  $d=0.627$ ). (E) Brain  
 12 regions showed increased activation during No-Think trials compared to Think trials. (F) Brain regions showed  
 13 increased activation during Think trials compared to No-Think trials.



## 1 **The transition of large-scale neural states from memory retrieval to memory suppression**

2 Based on neurocognitive models of memory suppression (Anderson and Hanslmayr, 2014), we focused on  
3 the neural dynamics within the inhibitory control network and the memory retrieval network. First, we  
4 used *Neurosynth* (<https://neurosynth.org/>), an automatic meta-analysis tool of neuroimaging data (Yarkoni  
5 et al., 2011), to identify the inhibitory control network and memory retrieval network independently from  
6 our fMRI data. Using the term “*inhibitory control*” and “*memory retrieval*,” we performed term-based  
7 meta-analyses to reveal two distinct brain networks of inhibitory control (**Figure S3A**) and memory  
8 retrieval (**Figure S3B**) separately. The two meta-analytic maps have *overlapping* areas, including the IFG,  
9 insular, SMA, inferior parietal lobule (**Figure S3C**). Interestingly, the latter areas are highly similar to a  
10 “task switching” map generated by *Neurosynth* using the term “*task switching*” (**Figure S3D**).

11 In the next step, to enable a regions-of-interest analysis, we separated the identified *inhibitory control*,  
12 *memory retrieval* and *overlapping* networks into regions-of-interest (ROIs) based on the combination of a  
13 connectivity-based neocortical parcellation (number of parcels=300) (Schaefer et al., 2018) and  
14 subcortical regions (number of regions=14) (*Details see Methods*). Using this approach, we identified 71  
15 parcels as *memory-related regions*, 29 parcels were categorized as *control-related regions*, and 10 parcels  
16 were labeled as *overlapping regions* (**Figure 2A**). Finally, BOLD time series were extracted from each  
17 voxel, averaged within each ROI, and further processed.

18 Using these time series, we characterized the group-average transition of neural states when the task  
19 demand changed from Think to No-Think trials (**Figure 2B**). Based on the task instruction, the time series  
20 were firstly split for the Think and No-Think conditions separately and then concatenated across all runs  
21 of all participants. For each task demand, all ROIs were ranked based on their state-specific averaged  
22 neural activity across runs (the highest activity was ranked first) to represent their relative dominance  
23 during that neural state (i.e., Think or No-Think). For control purposes, the same analysis was repeated for  
24 raw signal intensities (**Figure S4B**) and their Z-values (**Figure S4C**) and yielded highly similar patterns.  
25 A Kruskal-Wallis test showed that during Think trials, *memory-related regions*, *control-related regions*,

1 and *overlapping regions* differed in their ranks ( $H(2) = 40.48, p < 0.001$ ). Post-hoc Mann-Whitney tests  
2 using a Bonferroni-adjusted alpha level of 0.017 (0.05/3) were used to compare all group pairs. *Memory-*  
3 *related regions* (mean<sub>memory</sub>=40.22, SD<sub>memory</sub>=27.39) ranked higher than *control-related regions* (mean  
4 control=82.34, SD<sub>control</sub>=22.28) and *overlapping regions* (mean<sub>overlap</sub>=75.10, SD<sub>overlap</sub>=19.08) (memory-  
5 related vs. control-related:  $U=263, p < 0.001$ ; memory-related vs. overlapping:  $U=108, p < 0.001$ ). *Control-*  
6 *related regions* and *overlapping regions* did not differ significantly in their ranks ( $U=104, p=0.096$ ).  
7 Three types of regions also differed in their ranks during No-Think trials ( $H(2) = 36.60, p < 0.001$ ).  
8 *Memory-related regions* (mean<sub>memory</sub>=67.96, SD<sub>memory</sub>=27.94) ranked lower than *control-related regions*  
9 (mean<sub>control</sub>=27.24, SD<sub>control</sub>=23.13) and *overlapping regions* (mean<sub>overlap</sub>=37.80, SD<sub>overlap</sub>=21.10)  
10 (memory-related vs. control-related:  $U=238, p < 0.001$ ; memory-related vs. overlapping:  $U=144, p=0.001$ ).  
11 *Control-related regions* and *overlapping regions* did not differ significantly in their ranks ( $U=101,$   
12  $p=0.081$ ). All comparisons between *memory-related* and *control-related/overlapping regions* were  
13 significant after Bonferroni-adjustment (all  $p_s \leq 0.001$ ). Furthermore, we performed additional analyses of  
14 neural state transition by dividing all ROIs into three groups (i.e., *increased group*, *stable group*, and  
15 *decreased group*) based on their relative changes in rank (See *Supplemental Material*).

16

## 17 **The transition of neural states during the TNT task is associated with subsequent suppression-** 18 **induced forgetting**

19 We already demonstrated that activity of *control-related regions* increased, and the activity of *memory-*  
20 *related regions* decreased when the task demands switched from Think to No-Think. To assess if these  
21 regional brain activity changes are associated with the behavioral consequence of memory suppression  
22 (i.e., suppression-induced forgetting effect), we quantified this neural state transition at the individual  
23 level and examined whether individual differences in the transition predict individual subsequent  
24 suppression-induced forgetting measures (i.e., *subjective and objective suppression score*). The subjective  
25 and objective *suppression score* was calculated by subtracting the memory measure (i.e., confidence

1 rating or recall accuracy) of suppression associations (i.e., “No-Think” items) from the control association  
2 separately.

3 Based on the group-level fMRI results, we calculated a *state transition index* to represent the degree of  
4 neural transition during the TNT task for each participant. The state transition index was calculated by  
5 adding up the averaged relative decreases in ranks of all *memory-related regions* and the averaged relative  
6 increase in rank of all *control-related regions*. The *state transition index* tended to be positively correlated  
7 with individual differences in *objective suppression scores* ( $r=0.36$ ,  $p=0.06$ ; **Figure 2C**), and *subjective*  
8 *suppression scores* ( $r=0.38$ ,  $p=0.05$ ; **Figure 2D**). For validation purposes (not an independent analysis),  
9 we used an alternative method (i.e., *state transition index Version2(V2)*) to measure neural state transitions  
10 for each participant. This method was based on additional analyses of Think-to-No-Think neural state  
11 transition (See *Supplemental Materials*): all ROIs were divided into three groups (i.e., *increased group*,  
12 *stable group*, and *decreased group*) based on their relative changes in ranks. The state transition index V2  
13 was calculated as the sum of the percentage of *memory-related nodes* within the *decreased group* and  
14 percentage of *control-related nodes* within the *increased group*. We also found the same significant  
15 correlations between *state transition index V2* and both *objective* and *subjective suppression scores*  
16 (**Figure S5**). These results suggested that the transition of neural states during the TNT task is relevant for  
17 the subsequent suppression-induced forgetting measured in the final memory test.

18

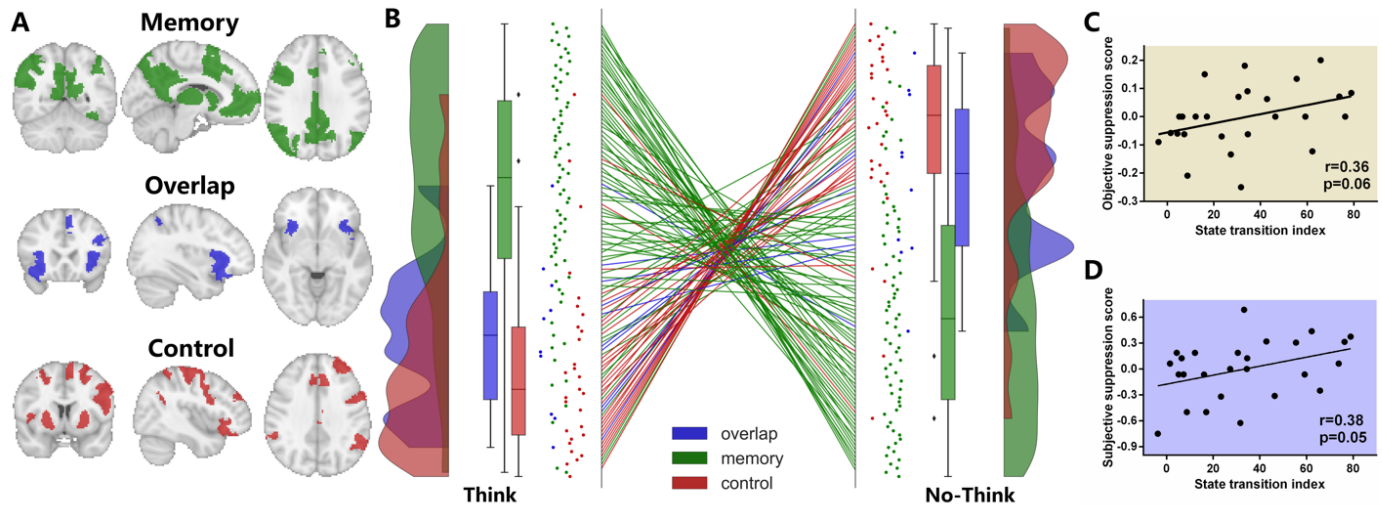

1

2 **Figure 2 (A)** Memory retrieval network (GREEN) and inhibitory control network (RED) was defined using the  
3 *Neurosynth* independent of fMRI data analyzed in this study. The overlap between the two brain networks was  
4 defined as the overlapping network (BLUE). **(B)** When the task demand switched from Think to No-Think, the  
5 activity of brain regions within the inhibitory control network increased, while the activity of brain regions within the  
6 memory retrieval network decreased. **(C)** Individual differences in the neural state transition (*state transition index*  
7 *details see Methods*) tended to correlate with the objective suppression-induced forgetting effect during subsequent  
8 memory retrieval task ( $r=0.36$ ,  $p=0.06$ ). **(D)** The same index also tended to correlate with the subjective suppression-  
9 induced forgetting effect ( $r=0.38$ ,  $p=0.05$ ).

10

## 11 **Switch of task demand is accompanied by the delayed transition between neural states**

12 To reveal how neural representations of task demands change during task switching, we used a  
13 multivariate decoding method to track the dynamics of neural state transitions on the volume-by-volume  
14 basis (**Figure 3A**). Support Vector Classification (SVC) was used to classify the underlying neural states  
15 (i.e., Think vs. No-Think) based on the fMRI activity intensity of all 110 ROIs at each given time point.  
16 Participant-specific classifiers were fitted on neural and task demand data from N-1 runs (i.e., four runs)  
17 and tested on the one remaining test run. Then the decoding accuracy was evaluated for each TNT run by  
18 comparing the decoded task demands with the actual demands. Averaged across runs, we were able to  
19 decode task demands based on ROIs' neural activity with the mean accuracy of 59.5% (SD=3.9% range  
20 from 52.5% to 67.1%) (**Figure 3B**). This accuracy is significantly higher than the chance level (i.e., 50%)  
21 ( $t(25)=12.5$ ,  $p<0.001$ , Cohen's  $d=2.453$ ). We generated the confusion matrix of our decoding analysis to  
22 quantify all types of correct and incorrect classifications (**Figure 3C**). 57.9% (SD=4.1%, range from 50.6%

1 to 65.7%) of Think time points were correctly classified as Think. Among all No-Think time points, 61.1%  
2 (SD=3.9%, range from 53.9% to 68.4%) of them were correctly classified as No-Think. To reveal the  
3 relative contribution of each ROI to this decoding performance, we visualized the neural state-predictive  
4 pattern (i.e., SVC discriminating weights) in **Figure 3D**, which revealed a frontoparietal network of strong  
5 task demand representation, including the dorsal anterior cingulate cortex (dACC), DLPFC, IFG, superior,  
6 and inferior parietal lobule (**Table S3**). These regions were largely similar to the *overlapping network*  
7 (**Figure S6**).

8 To reveal how the switch of task demands affected underlying neural state transitions, we calculated the  
9 decoding accuracy for “switch” and “non-switch” time points separately. Higher decoding accuracy  
10 represented a timely update of neural states according to the current task demand, thus stronger neural  
11 representation of task demand. Compared to “switch” time points, task demand of “non-switch” time  
12 points can be decoded more accurately ( $t(25)=3.93$ ,  $p<0.001$ , Cohen’s  $d=0.77$ ; **Figure 3E**). That is to say,  
13 time points within No-Think trials following a Think trial were more often misclassified as Think trials  
14 compared to a No-Think trial following another No-Think trial. This pattern of results was also observed  
15 for Think trials. These findings suggest a delayed neural state transition immediately after the task  
16 switching.

17

### 18 **Mismatches between task demand and underlying neural state relate to switch costs**

19 Unlike most of the decoding analyses, which usually focused on the accuracy of the classifier, here we  
20 were particularly interested in the relationship between misclassified moments and *switch costs*. We  
21 already demonstrated that these misclassifications were largely induced by task switching, and we  
22 predicted that this mismatch could be the neural source of behavioral *switch costs*. To test this idea, we  
23 averaged the trial-by-trial performance measures (i.e., retrieval frequency rating for Think trials and  
24 intrusion frequency rating for No-Think trials) for four situations at issue (i.e., Think-Correct

1 classification, Think-Incorrect classification, No-Think- Correct classification and No-Think- Incorrect  
2 classification) within switch trials.

3 We found that participants' behavioral performance was impaired during these mismatch moments (i.e.,  
4 incorrect classifications (mean<sub>incorrect</sub>=43.9%; SD<sub>incorrect</sub>=2.6%; ranging from 38.5% to 49.8% of all  
5 classifications)) immediately after task switches. Specifically, during the Think condition, when neural  
6 states were mistakenly classified as No-Think, the retrieval frequency rating was lower ( $t(25)=3.57$ ,  
7  $p=0.001$ ,  $d=0.701$ ; **Figure 3F**) compared to the situation in which task demands matched with the neural  
8 state. During No-Think trials, if neural states were erroneously decoded as Think, participants reported  
9 higher intrusion frequency rating ( $t(25)=-3.08$ ,  $p=0.005$ ,  $d=-0.606$ ; **Figure 3G**) compared to the situation  
10 in which classifications were correct.

11 In our exploratory analyses, we found that such mismatch moments not only occurred during the task-  
12 switching but was also observed (but less frequently) during non-switch trials. Using the same decoding  
13 method, but focusing on non-switch time points, we found a similar detrimental effect of mismatch on  
14 behavioral performance (**Figure S7**). These findings suggested that spontaneous, uninstructed neural state  
15 transitions that do not fit current task demands also have behavioral impacts.

16



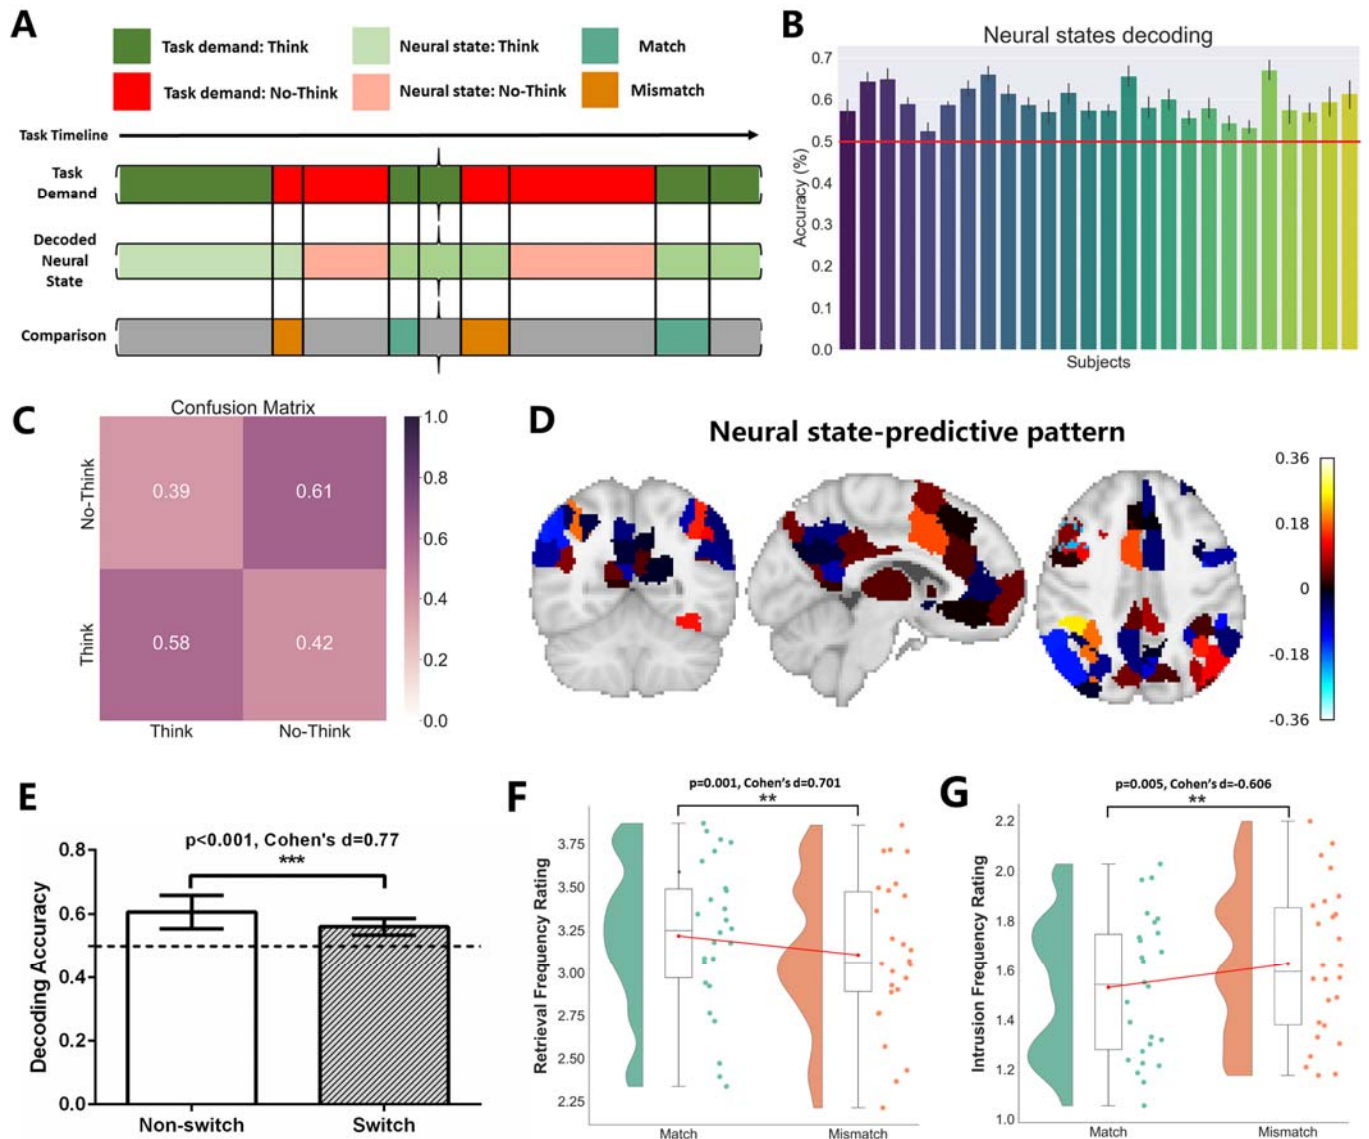

1  
2

3 **Figure 3** (A) Neural state decoding analysis. We trained the decoder based on large-scale brain network activity to  
 4 classifier the task demand represented in the brain. We hypothesized that immediately after the switch of the task  
 5 demand, the transition of the underlying neural state could be delayed. Therefore, the task demand could be  
 6 misclassified as the opposite by the decoder. The real task demand was compared with the decoded neural state. The  
 7 correctly decoded moments were labeled as “match” (e.g., Think as Think), while incorrectly decoded moments were  
 8 defined as “mismatch” (e.g., Think as No-Think). (B) Decoding accuracies were presented for each participant and  
 9 against the chance level of 50%. (C) Confusion matrix for four types of classification results. On average, 39% of the  
 10 Think moments were labeled as No-Think, and 42% of the No-Think moments were regarded as Think moments by  
 11 the decoder. These were the so-called “mismatch” moments depicted in Figure 3A. (D) The contribution of different  
 12 brain regions during the decoding. This predictive pattern mainly includes the dACC, DLPFC, IFG, superior, and  
 13 inferior parietal lobule. (E) More “mismatch” moments were found immediately after the task switching, indexed by  
 14 the lower decoding accuracies during switch compared to non-switch moments ( $p < 0.001$ , Cohen's  $d = 0.77$ ). (F) After  
 15 the task switching, when the decoded neural state did not match with the task demand (i.e., Think decoded as No-  
 16 Think), participants reported worse memory retrieval performance during Think trials ( $p < 0.001$ , Cohen's  $d = 0.70$ ).  
 17 (G) When the neural decoder misclassified No-Think moments as Think, participants reported more memory  
 18 intrusions during No-Think trials ( $p = 0.005$ , Cohen's  $d = 0.606$ ).

## 1 **Neural state transitions are not the results of differences in head motion**

2 We observed large-scale neural state transitions during the TNT task. Individual differences in these  
3 transitions were associated with the subsequent suppression-induced forgetting effect. There is a  
4 possibility that these neural state transitions are based on artifacts caused by different levels of participants'  
5 head motion (Siegel et al., 2017; Huang et al., 2018) between Think and No-Think trials since more  
6 inhibitory control resource was required for No-Think trials compared to Think trials (Anderson and  
7 Green, 2001; Anderson and Hanslmayr, 2014). Therefore, we examined the relationship between head  
8 motion, neural state transitions, and behaviors to rule out this alternative explanation.

9 We analyzed the time series of head motion (i.e., framewise displacement (FD) (Power et al., 2012))  
10 during the TNT task. First, there is literally no difference in mean FD values between Think and No-Think  
11 trials ( $FD_{\text{Think}}=0.149$  (SD=0.047);  $FD_{\text{No-Think}}=0.149$  (SD=0.046);  $t(25)=0.30$ ,  $p=0.76$ , Cohen's  $d=0.06$ ).  
12 Second, for each participant, we calculated differences between the head motion of Think and No-Think  
13 trials (i.e.,  $FD_{\text{Think}}-FD_{\text{No-Think}}$ ) and found no correlation between these differences and *state transition*  
14 *indices* ( $r=-0.3$ ,  $p=0.12$ ), *objective suppression scores* ( $r=-0.14$ ,  $p=0.46$ ) or *subjective suppression scores*  
15 ( $r=-0.23$ ,  $p=0.25$ ). Third, we asked whether head motion could affect our neural state decoding analysis.  
16 The head motion level tended to be lower ( $t(25)=-1.96$ ,  $p=0.06$ ,  $d=-0.38$ ) for correct decoding  
17 ( $FD_{\text{correct}}=0.147$ ; SD=0.045), compared to incorrect decoding ( $FD_{\text{incorrect}}=0.151$ ; SD=0.048). This  
18 difference raised the question of whether the lower decoding accuracy for switch compared to non-switch  
19 condition resulted from higher head motion instead of differences in the neural representation related to  
20 task demands. Therefore, we also compared head motions between the switch and the non-switch  
21 conditions. In fact, we found that head motion is even lower in the switch condition ( $FD_{\text{switch}}=0.145$   
22 (SD=0.048);  $FD_{\text{non-switch}}=0.150$  (SD=0.047);  $t(25)=3.35$ ,  $p=0.003$ ,  $d=0.65$ ). This result ruled head motion  
23 out as an alternative explanation for the lower decoding accuracy for the switch condition. If the lower  
24 decoding accuracy during switching were driven by excessive head motion dominantly, we would observe



1 relatively higher instead of lower head motion. In sum, analyses of head motion suggest that our  
2 neuroimaging results are not likely to a consequences of variations in head motions.

3

#### 4 **Discussion**

5 Task switching is a crucial cognitive ability that has been intensively studied using behavioral and  
6 neuroimaging methods (Meiran, 2010; Ruge et al., 2013; Richter and Yeung, 2014). Here, we investigated  
7 the task switching process between memory retrieval and suppression and demonstrated that memory  
8 suppression is more difficult when the task demand for the participants just switched from retrieval to  
9 suppression. Applying multivariate decoding methods to human fMRI data, we revealed that immediately  
10 after the switch, task demands were weakly represented by the inhibitory control and memory retrieval  
11 networks, indexed by the lower decoding accuracy, compared to non-switch trials. Importantly, during the  
12 switching, when the neural representation of task demand cannot be updated in time to match the current  
13 demand, participants reported more memory intrusions in No-Think trials and less memory retrieval in  
14 Think trials. Together, we propose a novel mechanism that explains behavioral *switch costs* during task  
15 switching between retrieval and suppression: delayed transition of task-related neural states is associated  
16 with behavioral switch costs. That is to say, if the neural state cannot be timely updated after the switch of  
17 task demand, behavioral performance is compromised.

18 In the current study, participants were instructed to perform one of two opposite memory-related tasks (i.e.,  
19 memory retrieval and memory suppression), with the task demand staying the same or switching between  
20 consecutive trials. Similar to what reported in the classical task-switching paradigms (Jersild, 1927;  
21 Spector and Biederman, 1976), we found *switch costs* that are specific to memory suppression.  
22 Participants reported more memory intrusions when the current No-Think trial followed a Think trial,  
23 suggesting a higher demand for cognitive control over the tendency to retrieve during switch trials  
24 compared to non-switch trials. This lasting effect of memory retrieval on the subsequent memory

1 suppression has not been reported before, but Hulbert and colleagues reported a lasting effect of memory  
2 suppression on the subsequent memory formation (Hulbert et al., 2016): when healthy participants  
3 suppressed unwanted memories, they were more likely to fail to encode information that was presented  
4 after a suppression trial. It was proposed that memory suppression created an amnesic time window,  
5 preventing the experience within the window being transformed into long-term memory. Evidence from  
6 fMRI supported this model by showing the reduction of hippocampal activity during memory suppression  
7 trials, and the positive correlation between individual differences in decreased hippocampal activity and  
8 the extent of memory impairment across participants (Hulbert et al., 2016).

9 Our finding of more memory intrusions during the No-Think trials that followed a Think trial could result  
10 from a similar mechanism: the preceding Think trials creates a time window in which the hippocampus  
11 remains active to support retrieval. However, if the transition of the neural state is delayed, the following  
12 No-Think trials are still located within this window, and therefore more prefrontal control resources are  
13 needed to down-regulate hippocampal activity. We tested this prediction beyond the hippocampus: large-  
14 scale neural activity of the inhibitory control and memory retrieval networks were analyzed by  
15 multivariate decoding methods to track the adaptive neural state transitions. We first characterized the  
16 transitions in neural states of memory retrieval and inhibitory control networks between Think and No-  
17 Think trials. Consistent with previous models of memory suppression (Anderson and Hanslmayr, 2014),  
18 our results showed that when the task demand switched from retrieval to suppression, memory retrieval-  
19 related regions, mainly including the hippocampus and regions of DMN, decreased their neural activity,  
20 while inhibitory control-related regions, such as dACC and LPFC, increased their activity. We also  
21 examined the relationship between individual differences in the efficiency of neural state transitions and  
22 the *suppression-induced forgetting effect* measured in the subsequent final memory test and found a  
23 positive correlation between them. There are two possible explanations for how neural state transitions are  
24 related to the effect of memory suppression: either larger or smaller state transitions are associated with  
25 stronger suppression effect. The more intuitive explanation is that larger transitions are beneficial for

1 suppression; however, our data suggested the opposite: participants who demonstrated less neural  
2 reconfiguration showed stronger memory suppression effect in the following final memory test. This  
3 finding is nevertheless consistent with a previous study, which demonstrated that higher intelligence is  
4 associated with less task-related neural reconfiguration (Schultz and Cole, 2016). Our data, together with  
5 this study, may suggest that less neural reconfigurations could reflect optimization for efficient (i.e., less)  
6 state updates, reducing processing demands (Schultz and Cole, 2016). This optimal task-related neural  
7 reconfiguration could then be beneficial for memory suppression.

8 Recent human fMRI studies revealed task representations using multivariate decoding methods. Brain  
9 regions such as the parietal cortex, medial, and lateral PFC encode the current task demands (Bode and  
10 Haynes, 2009; Cole et al., 2011; Gilbert, 2011; Woolgar et al., 2011; Momennejad and Haynes, 2013;  
11 Waskom et al., 2014; Wisniewski et al., 2015; Etzel et al., 2016) and our study provided further support  
12 for this idea by showing that neural activity patterns of these regions largely contributed to successful  
13 discrimination between two kinds of visually highly similar trials with opposite task demands (i.e.,  
14 memory retrieval and suppression). These identified regions have been previously associated with  
15 cognitive processing such as retrieval, maintenance, the process of rules or demands during task switching  
16 (Bunge et al., 2003; Sakai and Passingham, 2003; Gilbert, 2011; Woolgar et al., 2011; Reverberi et al.,  
17 2012). Beyond that, memory-related areas such as the hippocampus and regions within the DMN also  
18 contributed to the successful decoding in our study because the retrieval-demand and its associated neural  
19 activity significantly differed between Think and No-Think trials. However, whether these task  
20 representations can be modulated by external experimental manipulations and detected by fMRI signals is  
21 an ongoing debate. Task representations are modulated by factors including rule complexity (Woolgar et  
22 al., 2015), rewards (Etzel et al., 2016), and skill acquisition (Jimura et al., 2014), but not by variables such  
23 as task novelty (Cole et al., 2011), difficulty (Wisniewski et al., 2015), or intention (Zhang et al., 2013;  
24 Wisniewski et al., 2016). Two studies directly investigated whether and how cognitive control processes  
25 during task switching modulate the neural representation of task demands. Waskom and colleagues found

1 that task representations are enhanced after switches, indexed by the higher decoding accuracy (Waskom  
2 et al., 2014). However, they did not find evidence for behavioral switch costs in their sample; thus, the  
3 relationship between higher decoding accuracy and task representation is unclear. Loose and colleagues  
4 did find the behavioral switch costs, but no modulation effect in the task representations (i.e., comparable  
5 decoding accuracy between the switch and non-switch trials) (Loose et al., 2017). They, therefore,  
6 proposed the switch-independent neural representations of task demands. Compared to the mentioned two  
7 studies mentioned here, our study found behavioral switch costs for memory suppression and lower  
8 decoding accuracies for task representations in switch trials. Critically, our time-resolved decoding  
9 approach revealed the relationship between task representation and behavioral performance on a trial-by-  
10 trial basis. Specifically, we showed that in switch trials, if the underlying neural state matched the external  
11 task demand, behavioral performance remained intact, while if the neural state was incorrectly represented,  
12 task performance was compromised. This pattern of results may explain why higher decoding accuracy  
13 was reported together with limited behavioral switch costs in Waskom's study (Waskom et al., 2014). As  
14 the adaptive coding hypothesis suggests (Duncan, 2001, 2010; Waskom et al., 2014), our findings using  
15 the time-resolved decoding approach demonstrated the dynamic adjustment of task-specific neural  
16 representations and was able to associate delayed neural transitions with behavioral *switch costs*.

17 In summary, our results provide novel insights into the switch between memory retrieval and memory  
18 suppression. We found evidence for *switch costs* in memory suppression: it is more difficult to suppress  
19 unwanted memories immediately after memory retrieval. During switching between retrieval and  
20 suppression, we observed delayed transitions of neural states that each of them separately represents  
21 current task demand. Delayed neural transitions were associated with *switch costs* (i.e., unsuccessful  
22 suppression and retrieval). These results provide insight into the critical role of dynamically adjusted  
23 neural reconfigurations in supporting flexible memory suppression and the broader neural mechanisms by  
24 which humans can flexibly adjust their behavior in ever-changing environments.

25

1

## 2 **Materials and Methods**

### 3 **Participants**

4 In total, thirty-two right-handed, healthy young participants recruited from the Radboud Research  
5 Participation System finished all of the experimental procedures. All of them are native Dutch speakers.  
6 Six participants were excluded from data analyses due to low memory performance (i.e., lower the chance  
7 level) (n=2), or excessive head motion (n=4). We used the motion outlier detection program within the  
8 FSL (i.e., FSLMotionOutliers) to detect timepoints with large motion (threshold=0.9). There are at least  
9 20 spikes detected in these excluded participants with the largest displacement ranging from 2.6 to 4.3,  
10 while participants included had less than ten spikes. Finally, 26 participants (15 females, age=19-30,  
11 mean=23.51, SD=3.30) were included in the behavioral and neuroimaging analysis reported in this study.  
12 Due to the reconstruction error during the data acquisition, one run of one participant is not complete (20-  
13 30 images were missing). Therefore, that run was not included in our analysis of time series. But  
14 unaffected acquired images of that run were used in our univariate activation analysis. No participants  
15 reported any neurological and psychiatric disorders. We further used the Dutch-version of the Beck  
16 Depression Inventory (BDI) (Roelofs et al., 2013) and State-Trait Anxiety Inventory (STAI) (van der Bij  
17 et al., 2003) to measure the participants' depression and anxiety level during scanning days. No participant  
18 showed a sign of emotional problems (i.e., their BDI and STAI scores are within the normal range). The  
19 experiment was approved by and conducted in accordance with requirements of the local ethics committee  
20 (Commissie Mensgebonden Onderzoek region Arnhem-Nijmegen, The Netherlands) and the declaration  
21 of Helsinki, including the requirement of written informed consent from each participant before the  
22 beginning of the experiment. Each participant got 10 euros/hour for their participating.

### 23 **Experiment design**

1 This experiment is a two-day fMRI study, with 24 hours delay between two sessions (**Figure S8**). fMRI  
2 data of the day2 final memory test has been published in another publication (Liu et al., 2020a), and the  
3 comprehensive reports of the experimental materials and design can be found there. Because all of the  
4 behavioral and neuroimaging data included in this study came from the Day2 session, we just presented a  
5 brief description of the Day1 session. On day1, we instructed participants to memorize a series of  
6 sequentially presented location-picture associations, for which 48 distinct photographs were presented  
7 together with 48 specific locations on two cartoon maps. All photographs can be assigned into one of the  
8 four categories, including animal, human, scene (e.g., train station), and object (e.g., pen and notebooks).  
9 Therefore, objective memory performance could be assessed within the scanner by instructing participants  
10 to indicate the picture's category when cued by the map location. During this study phase, each location-  
11 picture association was presented twice, and the learning was confirmed by two typing tests outside the  
12 scanner. During the typing tests, participants were required to describe the photograph associated with the  
13 memory cue in one or two sentences. Immediately after the study phase (Day1), 88.01% of the associated  
14 pictures were described correctly (SD= 10.87%; range from 52% to 100%).

15 On Day2, participants first performed the second typing test, and still recalled 82.15% of all associations  
16 (SD = 13.87%; range from 50% to 100%). Then, they performed the Think/No-Think (TNT) task, and  
17 final memory test insider the scanner. We used the TNT task with trial-by-trial performance rating to  
18 monitor the retrieval or suppression of each trial. Compared to the original TNT task (Anderson, 2004),  
19 the additional self-report did not affect the underlying memory suppression process and also was used in a  
20 neuroimaging experiment before (Levy and Anderson, 2012). Forty-eight picture-location associations  
21 were divided into three conditions (i.e., “think or retrieval,” “no-think or suppression,” and “baseline or  
22 control” condition) in a counterbalanced way, therefore, for each association, the possibility of belonging  
23 to one of the three conditions is equal. During the retrieval condition, locations were highlighted with the  
24 GREEN frame for 3s, and participants were instructed to recall the associated picture quickly and actively  
25 and to keep it in mind until the map disappeared from the screen. By contrast, during the suppression

1 condition, locations were highlighted with the RED frame for 3s, and our instruction for participants was  
2 to prevent the potential memory retrieval and try to keep an empty mind. We gave additional instructions  
3 for the suppression condition: *“when you see a location, highlighted with a RED frame, you should NOT*  
4 *think about the associated picture. Instead, you should try to keep an empty mind during this stage. It is a*  
5 *difficult task, and it is totally fine that sometimes you still think about the associated picture. But please do*  
6 *NOT close your eyes, focus on something outside the screen, or think about something else in your life.*  
7 *These strategies, although useful, could negatively affect the brain activity that we are interested in .....”.*  
8 After each trial, participants had a maximum 3s to press the button on the response box to indicate  
9 whether and how often the associated picture entered their mind during Think or No-Think trials.  
10 Specifically, they rated their experience from 1-4 representing from No Recall (i.e., Never) to Always  
11 Recall. Responses during Think trials were used as retrieval frequency ratings, while responses during No-  
12 Think trials were regarded as intrusion frequency ratings. Associations which belong to the control  
13 condition were not presented during this phase. The TNT task included five functional runs, with 32  
14 retrieval trials and 32 suppression trials per run. All “retrieval” or “suppression” associations were  
15 presented twice within one run, but not next to each other. Therefore, they were presented ten times during  
16 the entire TNT task. Between each trial, fixation was presented for 1-4s (mean=2s, exponential model) as  
17 the inter-trial intervals (ITI).

18 To investigate the task switching within the TNT task, for each run of each participant, we predefined the  
19 sequence of task demand to form “blocks” of memory retrieval or suppression with the length range from  
20 1 trial to 4 trials (mean=1.9 trials, std=1.01 trials,  $P_{\text{one-trial block}}=46.875\%$ ,  $P_{\text{two-trials block}}=25\%$ ,  $P_{\text{three-trials}}$   
21  $_{\text{block}}=18.75\%$ ,  $P_{\text{four-trials block}}=9.375\%$ ). In this sequence, the task demand of the current trial can be the same  
22 as the previous trial (“non-switch” trial) or differ from the previous trial (“switch” trial). Within one run of  
23 a total of 64 trials, 31 trials were “non-switch” trials, 32 trials were “switch” trials, and the first trial  
24 cannot be labeled as “non-switch” trials or “switch” trials because it has no predecessor. The “non-switch”  
25 trials and “switch” trials both accounted for around 50% of the “retrieval” and “suppression” trials. After

1 determining the sequence of task demand, specific location-picture associations from retrieval or  
2 suppression condition were randomly selected for each trial.

3 After the TNT task, a final memory test was performed by participants within the scanner to evaluate the  
4 effect of different modulations on memory. All 48 memory cues (i.e., locations) were presented again with  
5 the duration of 4s by highlighting a certain part of the map with a BLUE frame. Participants were  
6 instructed to recall the associated picture as vividly as possible during the presentation and then give the  
7 responses on two multiple-choice questions within 7s (3.5s for each question). The first one is the measure  
8 of subjective memory: “how confident are you about the retrieval?”. Participants had to rate from 1 to 4  
9 representing “Cannot recall, low confident, middle confident and high confident” separately. The second  
10 one is the measure of objective memory: “Please indicate the category of the picture you were recalling.”  
11 They needed to choose from four categories (i.e., Animal, Human, Scene, and Object). It is notable that  
12 we only analyzed the behavioral data from this within-scanner memory test; the neural activity during this  
13 test is not the focus of this study.

#### 14 **Behavioral data analysis**

15 Behavioral results of this project were comprehensively reported in another study of our lab with the focus  
16 on the final memory test (Liu et al., 2020a). No results of tasks switching (i.e., *switch costs*) were reported  
17 in that study, and task switching is the central scientific question of this study. First, we analyzed the  
18 behavioral performance during the TNT task. Trial-by-trial performance reports from each participant  
19 were used to calculate the percentage of successful recall chosen across 160 retrieval trials and successful  
20 suppression across 160 suppression trials. Following previous studies (Levy and Anderson, 2012; Liu et  
21 al., 2020a), performance reports from suppression trials were used to quantify individual differences in  
22 memory suppression efficiency (“*intrusion slope score*”). To account for the individual differences in  
23 memory performance before the TNT, we restricted the analysis of suppression into the associations for  
24 which participants can still remember during the second typing test (“remembered associations”). We used  
25 linear regression to model the relationship between intrusion frequency ratings of “remembered



1 associations” and the number of repetitions of suppression at the individual level. Participants with more  
2 negative slope scores are better at downregulating memory intrusions than those with less negative slope  
3 scores. Furthermore, we labeled each trial as the “non-switch” trial or “switch” trial based on whether the  
4 task demand of the current trial is the same as the previous trial. Trial-by-trial performance between  
5 “switch” and “non-switch” trials during retrieval or suppression was compared using paired t-tests.

6 We also quantified the individual differences in *suppression-induced forgetting effect* based on two types  
7 of participants’ performance (i.e., recall accuracy and confidence rating) during the final memory test. For  
8 each participant, recall accuracy (objective memory measure) and confidence rating (subjective memory  
9 measure) were calculated for No-Think associations and control associations separately. Then objective  
10 and subjective *suppression scores* were computed separately by subtracting the accuracy and confidence  
11 of No-Think associations from the control associations. The more negative a *suppression score* is, the  
12 stronger the *suppression-induced forgetting effect* is. The memory suppression score was used to correlate  
13 with the “*intrusion slope score*” and transition of neural states during the TNT.

#### 14 **MRI data acquisition and preprocessing**

15 We used a 3.0 T Siemens PrismaFit scanner (Siemens Medical, Erlangen, Germany) and a 32 channel  
16 head coil system at the Donders Institute, Centre for Cognitive Neuroimaging in Nijmegen, the  
17 Netherlands to acquire MRI data. For each participant, MRI data were acquired on two MRI sessions  
18 (around 1 hour for each session) with 24 hours’ interval. In this study, we only used the data from the  
19 day2 session. Specifically, we acquired a 3D magnetization-prepared rapid gradient echo (MPRAGE)  
20 anatomical T1-weighted scan for the registration purpose with the following parameters: 1 mm isotropic,  
21 TE = 3.03 ms, TR = 2300 ms, flip angle = 8 deg, FOV = 256 × 256 × 256 mm. All functional runs were  
22 acquired with Echo-planar imaging (EPI)-based multi-band sequence (acceleration factor=4) with the  
23 following parameters: 68 slices (multi-slice mode, interleaved), voxel size 2 mm isotropic, TR = 1500 ms,  
24 TE = 39 ms, flip angle =75 deg, FOV = 210 × 210 × 210 mm. In addition, to correct for distortions,

1 magnitude and phase images were also collected (voxel size of  $2 \times 2 \times 2$  mm, TR = 1,020 ms, TE = 12 ms,  
2 flip angle = 90 deg).

3 We used the FEAT (FMRI Expert Analysis Tool) Version 6.00, part of FSL (FMRIB's Software Library,  
4 [www.fmrib.ox.ac.uk/fsl](http://www.fmrib.ox.ac.uk/fsl)) (Jenkinson et al., 2012) together with Automatic Removal of Motion Artifacts  
5 (ICA-AROMA) (Pruim et al., 2015) to perform our preprocessing. This pipeline was based on procedures  
6 suggested by Mumford and colleagues (<http://mumfordbrainstats.tumblr.com>) and the article that  
7 introduced the ICA-AROMA (Pruim et al., 2015). Specifically, we first removed the first four volumes of  
8 each run from the 4D sequences for the stabilization of the scanner and then applied the following pre-  
9 statistics processing: (1) motion correction using MCFLIRT (Jenkinson et al., 2002); (2) field  
10 inhomogeneities were corrected using B0 Unwarping in FEAT; (3) non-brain removal using BET (Smith,  
11 2002); (4) grand-mean intensity normalization of the entire 4D dataset by a single multiplicative factor; (5)  
12 spatial smoothing (6mm kernel). ICA-AROMA was used to further remove motion-related spurious noise.  
13 We chose to conduct “non-aggressive denoising” and applied highpass temporal filtering (Gaussian-  
14 weighted least-squares straight-line fitting with sigma=50.0s) before the following analyses.

15 All of the mentioned preprocessing steps were performed in native space. We used the following steps to  
16 perform the registration between native space, participant's high-resolution T1 space, and standard space.  
17 Firstly, we used the Boundary Based Registration (BBR) (Greve and Fischl, 2009) to register functional  
18 data to the participant's high-resolution structural image. Next, registration of high resolution structural to  
19 standard space was carried out using FLIRT (Jenkinson and Smith, 2001; Jenkinson et al., 2002) and was  
20 then further refined using FNIRT nonlinear registration (Andersson et al., 2007). Resulting parameters  
21 were used to align processed functional images from native-space to standard space for the following  
22 signal extraction.

23 **Univariate General Linear Model (GLM) analyses**

1 We ran the voxel-wise GLM analyses of the TNT task to identify brain regions that are more active during  
2 memory suppression compared to memory retrieval (i.e., No-Think VS Think). All time-series statistical  
3 analysis was carried out using FILM with local autocorrelation correction (Woolrich et al., 2001) using  
4 FEAT. In total, three regressors were included in the model. We modeled the presentation of memory cues  
5 (locations) as two kinds of regressors (duration=4s)(i.e., suppression trials and retrieval trials). To account  
6 for the effect of unsuccessful memory retrieval, we separately modeled the location-picture associations,  
7 which participants cannot recall before the TNT as a separate regressor. All the trials were convolved  
8 double gamma hemodynamic response function (HRF) within the FSL.

9 We conducted the two contrasts-of-interest (i.e., No-Think VS Think and Think VS No-Think) first at the  
10 native space and then aligned resulting statistical maps to MNI space using the parameters from the  
11 registration. These aligned maps were first used for participant-level averaging across five TNT runs, and  
12 then the group-level analyses. The group-level statistical map was corrected for multiple comparisons  
13 using default cluster-level correction within FEAT (voxelwise  $Z > 3.1$ , cluster-level  $p < .05$  FWER  
14 corrected).

### 15 **Networks-of-interest identification**

16 To identify our networks-of-interest (i.e., inhibitory control network and memory retrieval network), we  
17 performed several term-based meta-analyses using the *Neurosynth* (<https://neurosynth.org/>) (Yarkoni et al.,  
18 2011). “Inhibitory control” and “memory retrieval” were used as terms separately to search for all studies  
19 in the *Neurosynth* database whose abstracts include the input term at least once. Then, all identified  
20 studies were combined separately for each term to generate the corresponding statistical map. We used  
21 uniformity test maps in our study. This method tested whether the proportion of studies that report  
22 activation at a given voxel differs from the rate that would be expected if activations were uniformly  
23 distributed throughout the grey matter. Voxel-wise Z-score from the one-way ANOVA testing was saved  
24 in a statistical map. Each map was thresholded to correct for multiple comparisons using a false discovery  
25 rate (FDR)( $p < 0.01$ ). It is notable that due to the continuous update of the *Neurosynth* database, the number

1 of studies included in the analyses could be slightly different for each search, the maps we used can be  
2 found in our *NeuroVault* repository (<https://identifiers.org/neurovault.collection:7731>). Similar network  
3 identification was also performed using *BrainMap* (Laird et al., 2005) as a confirmation. The two methods  
4 of meta-analysis yielded highly similar maps of network-of-interests (**Figure S9**), and we used the maps  
5 generated by the *Neurosynth* in our main text.

6 We used the thresholded ( $p_{FDR} < 0.01$ ) spatial maps of “inhibitory control” and “memory retrieval” to  
7 general three masks of networks-of-interest. The areas which belong to both the “inhibitory control” and  
8 “memory retrieval” masks were labeled as *overlap regions*, the areas which only belong to the “inhibitory  
9 control” mask were labeled as *control-related regions*, and the areas which only belong to the “memory  
10 retrieval” masks were labeled as *memory-related regions*.

### 11 **Brain parcels for the extraction of time series**

12 We combined a parcellation of cerebral regions (N=300) (Schaefer et al., 2018) and all subcortical regions  
13 (N=14) from the probabilistic Harvard-Oxford Subcortical Structural Atlas (Desikan et al., 2006) as a  
14 whole-brain parcellation. The parcellation of cerebral regions was based on a gradient-weighted Markov  
15 Random Field (gwMRF) model, which integrated local gradient and global similarity approaches  
16 (Schaefer et al., 2018). Based on both task fMRI and resting-state fMRI acquired from 1489 participants,  
17 parcels with functional and connectional homogeneity within the cerebral cortex were generated. Each  
18 parcel is one of the seven large-scale functional brain networks, including *Visual, Somatomotor, Dorsal*  
19 *Attention, Ventral Attention, Limbic, Frontoparietal, Default network* (Yeo et al., 2011). Subcortical  
20 regions included bilateral thalamus, caudate, putamen, globus pallidus, hippocampus, amygdala, and  
21 ventral striatum. Details of each parcel (e.g., name, coordinates, hemisphere) within the whole brain  
22 parcellation can be found in our OSF folder (<https://osf.io/cq96h/>).

23 For each of the 314 parcels of the whole-brain parcellation, we compared it with the mask of *overlap*  
24 *regions, control-related regions, and memory-related regions* and identified the mask in which the parcel

1 shared the highest percentage of common voxels. The parcel was assigned to that category if the highest  
2 percentage is higher than 10%. If the highest percentage of common voxels is lower than 10%, the parcel  
3 was not assigned to any category. After this procedure, 110 out of the 314 parcels were assigned to one of  
4 the categories. Specifically, 71 parcels were considered as *memory-related regions*, 29 parcels were  
5 categorized as *control-related regions*, and 10 parcels were labeled as *overlap regions* in our following  
6 analysis.

### 7 **Extraction of time series from parcels**

8 We additionally removed nuisance time series (cerebrospinal fluid (CSF) signals, white matter signals,  
9 motion, and event-related activity) using a method based on a projection on the orthogonal of the signal  
10 space (Friston et al., 1994; Lindquist et al., 2019). We generated confounding time series (CSF, white  
11 matter, the six rigid-body motion parameters (three translations and three rotations), and framewise  
12 displacement (FD)) for each run of each participant. Event-related activity time series were estimated by a  
13 finite impulse response (FIR) function. A recent study has shown that removal of event-related activity  
14 based on FIR modeling is an important step for the preprocessing of time series during a task (Cole et al.,  
15 2019). The signal from each parcel was extracted and z-scored, and all nuisance time series were removed  
16 simultaneously using the *nilearn.signal.clean* function. All cleaned time series were shifted 3 TRs (4.5 s)  
17 to account for the HRF delay and then aligned with the task demand (i.e., retrieval or suppression) at that  
18 moment.

### 19 **The transition of neural states analysis**

20 First, we characterized the transition of neural states at the group level. Extracted time series from each  
21 run of each participant were split according to the task instruction (i.e., memory retrieval or memory  
22 suppression) and concatenated. Second, two kinds of time series were further concatenated across five  
23 TNT runs within that participant (*except for one participant, only four complete TNT runs were included*).

1 Third, time series were concatenated across all participants. Fourth, two time-series were averaged across  
2 all time points to represent mean activity intensity for that parcel during retrieval or suppression.

3 To estimate the relative dominance of each parcel during two neural states (i.e., Think and No-Think), we  
4 ranked the mean activity intensity of each parcel (the highest activity was ranked first). We then calculated  
5 the changes in ranks when the task switched from Think to No-Think by subtracting the rank during Think  
6 from the rank during No-Think. The same analyses were conducted with raw signal intensity and Z-values.  
7 Related results can be found in the *Supplemental Materials*. The negative change suggested an increase in  
8 relative dominance, while the positive change represented the opposite. We calculated two neural indexes  
9 (“state transition index” and “state transition index Version 2 (V2)”) to quantify the transition of neural  
10 states at the individual level and associate this individual difference with the subsequent suppression-  
11 induced forgetting effect. The state transition index was calculated by adding up the averaged relative  
12 decreases in rank values all *memory-related regions*, and the averaged relative increase in rank values of  
13 all *control-related regions*. The calculation and results of “state transition index Version 2 (V2)” can be  
14 found in the *Supplemental Material*. It is notable that although transition index and transition index V2  
15 were calculated using different methods, they were based on the same set of data. Therefore, the data  
16 analyses of index V2 should not be regarded as independent analysis. These two state transition indices  
17 were used to correlated with the *objective suppression score* and *subjective suppression score* calculated  
18 based on behavioral performance during the final memory test after TNT.

### 19 **Neural states decoding analysis**

20 Before the decoding analysis, we generated the labels of task demand for each time point within the trial  
21 based on its instruction (i.e., Think or No-Think). For example, if the trial is a Think trial, time points  
22 started from the presentation of memory cues of this trial to the presentation of memory cues of the next  
23 trial were labeled as “Think.” We performed the time-resolved multivariate decoding analysis based on  
24 the brain activity of all 114 ROIs and corresponding labels of task demand during each time point. This  
25 decoding analysis allowed us to generate the predicted label of task demand for each time point, thus

1 revealing the fast dynamics of the neural state transition induced by the switch of task demand.  
2 Specifically, decoding analysis via the Support Vector Classification (SVC), the C-Support Vector  
3 Machine within the scikit-learn package (<https://scikit-learn.org/stable/>). We used default parameters of  
4 the function (regularization (C)=1, radial basis function kernel with degree=3). The classification of neural  
5 states was performed separately for each time point using a leave-one-run-out cross-validation approach  
6 within each participant. This procedure resulted in a decoded task demand for each time point of each  
7 participant. These predictions were evaluated by comparing these decoded task demands with actual task  
8 demand. To separate all types of correct and incorrect classification for the following analyses, we  
9 generated the confusion matrix for each participant. This confusion matrix contained the percentage of all  
10 four situations based on the task demand and if the prediction matches the task instruction (i.e., Think-  
11 Correct classification, Think- Incorrect classification, No-Think- Correct classification, and No-Think-  
12 Incorrect classification). We extracted all SVC discriminating weights assigned to the features during the  
13 participant-specific decoding and averaged them across all participants to generate the neural state-  
14 predictive pattern. The brain parcels with higher absolute values contributed more to decoding models.  
15 To test for possible differences in neural representations of task demand induced by the task-switching, we  
16 performed the described decoding analyses for switch time points and non-switch time points separately.  
17 The switch time points were defined as the presentation time (3TRs; 4.5s) of first memory cue after the  
18 switch of task demand. The two decoding analyses yielded decoding accuracies for switch time points and  
19 for non-switch time points for each participant. We compared these two types of decoding accuracies  
20 using the paired t-test. Less accurate decoding was described as the evidence for the weaker representation  
21 of the current task demand in the literature (Waskom et al., 2014; Loose et al., 2017). Also, because we  
22 only have two task demands, less accurate decoding reflects the unsuccessful transition from the previous  
23 demand to the current demand according to the instruction.  
24 Next, we aimed to investigate the behavioral relevance of the mismatch (i.e., incorrect classification)  
25 between task demand and the underlying neural state. Because we were mainly interested in the switch-

1 induced mismatch, we first restricted our analyses to these switch time points and then extended to the  
2 non-switch time points as an exploratory analysis. For each participant, we averaged the trial-by-trial  
3 behavioral performance during the TNT task based on whether the actual task demand matches with  
4 decoded task demands. This yielded retrieval performance and suppression performance for match and  
5 mismatch conditions. Paired t-tests were performed to examine the effect of mismatch on the performance  
6 of memory retrieval and memory suppression separately. The performance calculations and comparisons  
7 described above were repeated for non-switch time points as well.

### 8 **Relationship between head motion, neural state transitions, and behaviors**

9 To explicitly assess how head motion could potentially affect our results, we derived a volume-by-volume  
10 measure of head motion, framewise displacement (FD) (Power et al., 2012), during the TNT task. FD is  
11 defined as the sum (in mm) of rotational and translational displacements from the current volume to the  
12 next volume. We aligned the time-series of FD with task structure and behaviors in a way similar to the  
13 analyses of time series of fMRI signals but did not consider the HRF. The following contrasts were  
14 performed to compare head motion between conditions: (1) difference in FD between Think trials and No-  
15 Think trials; (2) difference in FD between correct neural state decoding and incorrect neural state  
16 decoding; (3) difference in FD between the switch and non-switch condition. Correlations analyses were  
17 performed between individual differences in head motion between Think and No-Think trials (i.e.,  
18  $FD_{\text{Think}} - FD_{\text{No-Think}}$ ), *state transition index*, *objective/subjective suppression score*.

### 19 **Data and code availability**

20 All research data were uploaded to the Donders Repository and will be publicly available after manuscript  
21 acceptance, in which case the persistent identifier that is currently reserved for this collection will become  
22 effective. The reviewable data can be found here: ([https://data.donders.ru.nl/login/reviewer-  
23 32038430/OhATso8yhvEv05RvdkvJQmGfuxTA7T6SinYgBAADafM](https://data.donders.ru.nl/login/reviewer-32038430/OhATso8yhvEv05RvdkvJQmGfuxTA7T6SinYgBAADafM)). Some data, such as statistical  
24 maps and brain parcels of interest were shared via the Neurovault Repository



1 (<https://identifiers.org/neurovault.collection:7731>). Supplemental Material can be found in OSF  
2 (<https://osf.io/cq96h/>).

3 Behavioral data were analyzed by *JASP* (<https://jasp-stats.org/>). For the term-based meta-analysis of  
4 neuroimaging studies, we used the *Neurosynth* (<https://neurosynth.org/>), and *BrainMap*  
5 (<http://www.brainmap.org/>). Preprocessing of neuroimaging data was performed by *FSL*  
6 (<https://fsl.fmrib.ox.ac.uk/fsl/fslwiki>), *ICA-AROMA* (<https://github.com/maartenmennes/ICA-AROMA>),  
7 and *fMRIPrep* (<https://fmriprep.readthedocs.io/en/stable/>). Python packages, including *Nilearn*  
8 (<https://nilearn.github.io/>), *Nistats* (<https://nistats.github.io/>), *Pandas* (<https://pandas.pydata.org/>), and  
9 *Numpy* (<https://numpy.org/>) were used for the analyses of time series. Machine learning algorithms were  
10 based on *scikit-learn* (<https://scikit-learn.org/>) and implemented via *Nilearn* (<https://nilearn.github.io/>).  
11 *Anaconda* (<https://www.anaconda.com/>) Python 3.6 was used as the platform for all the programming and  
12 statistical analyses. Custom Python scripts were written to perform all analyses described based on the  
13 mentioned Python packages; all code is available from the authors upon request and will be released via  
14 our OSF repository (<https://osf.io/cq96h/>) upon publication.

15

16

17

18

19

20

21

22

1 **References:**

- 2 Anderson MC (2004) Neural Systems Underlying the Suppression of Unwanted Memories. *Science* (80- ) 303:232–  
3 235 Available at: <https://www.sciencemag.org/lookup/doi/10.1126/science.1089504>.
- 4 Anderson MC, Green C (2001) Suppressing unwanted memories by executive control. *Nature* 410:366–369  
5 Available at: <http://www.nature.com/articles/35066572>.
- 6 Anderson MC, Hanslmayr S (2014) Neural mechanism of motivated forgetting. *Trends Cogn Sci* 18, Issue:1–14.
- 7 Andersson JLR, Jenkinson M, Smith S, others (2007) Non-linear registration aka Spatial normalisation FMRIB  
8 Technical Report TR07JA2. FMRIB Anal Gr Univ Oxford.
- 9 Bode S, Haynes J-D (2009) Decoding sequential stages of task preparation in the human brain. *Neuroimage* 45:606–  
10 613.
- 11 Braver TS, Reynolds JR, Donaldson DI (2003) Neural mechanisms of transient and sustained cognitive control  
12 during task switching. *Neuron* 39:713–726.
- 13 Bunge SA, Kahn I, Wallis JD, Miller EK, Wagner AD (2003) Neural circuits subserving the retrieval and  
14 maintenance of abstract rules. *J Neurophysiol* 90:3419–3428.
- 15 Cocuzza CV, Ito T, Schultz DH, Bassett DS, Cole MW (2019) Flexible coordinator and switcher hubs for adaptive  
16 task control. *bioRxiv:822213* Available at: <https://www.biorxiv.org/content/10.1101/822213v1>.
- 17 Cohen JD, Daw N, Engelhardt B, Hasson U, Li K, Niv Y, Norman KA, Pillow J, Ramadge PJ, Turk-Browne NB,  
18 Willke TL (2017) Computational approaches to fMRI analysis. *Nat Neurosci* 20:304–313 Available at:  
19 <http://www.nature.com/doi/10.1038/nn.4499>.
- 20 Cole MW, Etzel JA, Zacks JM, Schneider W, Braver TS (2011) Rapid transfer of abstract rules to novel contexts in  
21 human lateral prefrontal cortex. *Front Hum Neurosci* 5:142.
- 22 Cole MW, Ito T, Schultz D, Mill R, Chen R, Cocuzza C (2019) Task activations produce spurious but systematic  
23 inflation of task functional connectivity estimates. *Neuroimage* 189:1–18 Available at:  
24 <https://linkinghub.elsevier.com/retrieve/pii/S1053811918322043>.
- 25 Desikan RS, Ségonne F, Fischl B, Quinn BT, Dickerson BC, Blacker D, Buckner RL, Dale AM, Maguire RP,  
26 Hyman BT, others (2006) An automated labeling system for subdividing the human cerebral cortex on MRI  
27 scans into gyral based regions of interest. *Neuroimage* 31:968–980.
- 28 Dove A, Pollmann S, Schubert T, Wiggins CJ, Von Cramon DY (2000) Prefrontal cortex activation in task switching:  
29 an event-related fMRI study. *Cogn brain Res* 9:103–109.
- 30 Duncan J (2001) An adaptive coding model of neural function in prefrontal cortex. *Nat Rev Neurosci* 2:820–829.

- 1 Duncan J (2010) The multiple-demand (MD) system of the primate brain: mental programs for intelligent behaviour.  
2 Trends Cogn Sci 14:172–179.
- 3 Etzel JA, Cole MW, Zacks JM, Kay KN, Braver TS (2016) Reward motivation enhances task coding in  
4 frontoparietal cortex. *Cereb cortex* 26:1647–1659.
- 5 Friston KJ, Holmes AP, Worsley KJ, Poline J-P, Frith CD, Frackowiak RSJ (1994) Statistical parametric maps in  
6 functional imaging: a general linear approach. *Hum Brain Mapp* 2:189–210.
- 7 Gilbert SJ (2011) Decoding the content of delayed intentions. *J Neurosci* 31:2888–2894.
- 8 Gonzalez-Castillo J, Hoy CW, Handwerker DA, Robinson ME, Buchanan LC, Saad ZS, Bandettini PA (2015)  
9 Tracking ongoing cognition in individuals using brief, whole-brain functional connectivity patterns. *Proc Natl*  
10 *Acad Sci U S A* 112:8762–8767.
- 11 Goschke T (2000) Intentional reconfiguration and J-TI involuntary persistence in task set switching. *Control Cogn*  
12 *Process Atten Perform XVIII* 18:331.
- 13 Greve DN, Fischl B (2009) Accurate and robust brain image alignment using boundary-based registration.  
14 *Neuroimage* 48:63–72.
- 15 Gruber O, Karch S, Schlueter EK, Falkai P, Goschke T (2006) Neural mechanisms of advance preparation in task  
16 switching. *Neuroimage* 31:887–895.
- 17 Guo Y, Schmitz TW, Mur M, Ferreira CS, Anderson MC (2018) A supramodal role of the basal ganglia in memory  
18 and motor inhibition: Meta-analytic evidence. *Neuropsychologia* 108:117–134 Available at:  
19 <https://doi.org/10.1016/j.neuropsychologia.2017.11.033>.
- 20 Haynes J-D (2015) A primer on pattern-based approaches to fMRI: principles, pitfalls, and perspectives. *Neuron*  
21 87:257–270.
- 22 Hermans EJ, Van Marle HJF, Ossewaarde L, Henckens MJAG, Qin S, Van Kesteren MTR, Schoots VC, Cousijn H,  
23 Rijpkema M, Oostenveld R, others (2011) Stress-related noradrenergic activity prompts large-scale neural  
24 network reconfiguration. *Science* (80- ) 334:1151–1153.
- 25 Huang P, Carlin JD, Alink A, Kriegeskorte N, Henson RN, Correia MM (2018) Prospective motion correction  
26 improves the sensitivity of fMRI pattern decoding. *Hum Brain Mapp* 39:4018–4031.
- 27 Hulbert JC, Henson RN, Anderson MC (2016) Inducing amnesia through systemic suppression. *Nat Commun*  
28 7:11003 Available at: <http://www.nature.com/articles/ncomms11003>.
- 29 Jenkinson M, Bannister P, Brady M, Smith S (2002) Improved optimization for the robust and accurate linear  
30 registration and motion correction of brain images. *Neuroimage* 17:825–841.
- 31 Jenkinson M, Beckmann CF, Behrens TEJ, Woolrich MW, Smith SM (2012) Fsl. *Neuroimage* 62:782–790.

- 1 Jenkinson M, Smith S (2001) A global optimisation method for robust affine registration of brain images. *Med*  
2 *Image Anal* 5:143–156.
- 3 Jersild AT (1927) Mental set and shift. *Arch Psychol* 14:81–86.
- 4 Jimura K, Cazalis F, Stover ERS, Poldrack RA (2014) The neural basis of task switching changes with skill  
5 acquisition. *Front Hum Neurosci* 8:339.
- 6 Kiesel A, Steinhauser M, Wendt M, Falkenstein M, Jost K, Philipp AM, Koch I (2010) Control and interference in  
7 task switching—A review. *Psychol Bull* 136:849–874 Available at:  
8 <http://doi.apa.org/getdoi.cfm?doi=10.1037/a0019842>.
- 9 Laird AR, Lancaster JJ, Fox PT (2005) Brainmap. *Neuroinformatics* 3:65–77.
- 10 Levy BJ, Anderson MC (2012) Purging of Memories from Conscious Awareness Tracked in the Human Brain. *J*  
11 *Neurosci* 32:16785–16794 Available at: <http://www.jneurosci.org/cgi/doi/10.1523/JNEUROSCI.2640-12.2012>.
- 12 Lindquist MA, Geuter S, Wager TD, Caffo BS (2019) Modular preprocessing pipelines can reintroduce artifacts into  
13 fMRI data. *Hum Brain Mapp* 40:2358–2376.
- 14 Liu W, Kohn N, Fernández G (2020a) Probing the neural dynamics of mnemonic representations after the initial  
15 consolidation. *bioRxiv* Available at: <https://www.biorxiv.org/content/early/2020/02/09/803718>.
- 16 Liu W, Peeters N, Fernandez G, Kohn N (2020b) Common neural and transcriptional correlates of inhibitory control  
17 across emotion, memory, and response inhibition. *bioRxiv*.
- 18 Loose LS, Wisniewski D, Rusconi M, Goschke T, Haynes JD (2017) Switch-independent task representations in  
19 frontal and parietal cortex. *J Neurosci* 37:8033–8042.
- 20 Meiran N (2010) Task Switching: Mechanisms Underlying Rigid vs. Flexible Self-Control. In: *Self Control in*  
21 *Society, Mind, and Brain*, pp 202–220. Oxford University Press. Available at:  
22 [http://www.oxfordscholarship.com/view/10.1093/acprof:oso/9780195391381.001.0001/acprof-](http://www.oxfordscholarship.com/view/10.1093/acprof:oso/9780195391381.001.0001/acprof-9780195391381-chapter-11)  
23 [9780195391381-chapter-11](http://www.oxfordscholarship.com/view/10.1093/acprof:oso/9780195391381.001.0001/acprof-9780195391381-chapter-11).
- 24 Momennejad I, Haynes J-D (2013) Encoding of prospective tasks in the human prefrontal cortex under varying task  
25 loads. *J Neurosci* 33:17342–17349.
- 26 Monsell S (2003) Task switching. *Trends Cogn Sci* 7:134–140.
- 27 Power JD, Barnes KA, Snyder AZ, Schlaggar BL, Petersen SE (2012) Spurious but systematic correlations in  
28 functional connectivity MRI networks arise from subject motion. *Neuroimage* 59:2142–2154.
- 29 Pruim RHR, Mennes M, van Rooij D, Llera A, Buitelaar JK, Beckmann CF (2015) ICA-AROMA: a robust ICA-  
30 based strategy for removing motion artifacts from fMRI data. *Neuroimage* 112:267–277.
- 31 Reverberi C, Görgen K, Haynes J-D (2012) Compositionality of rule representations in human prefrontal cortex.

- 1 Cereb cortex 22:1237–1246.
- 2 Richter FR, Yeung N (2014) Neuroimaging studies of task switching. Oxford University Press Oxford, England.
- 3 Roelofs J, van Breukelen G, de Graaf LE, Beck AT, Arntz A, Huibers MJH (2013) Norms for the Beck Depression  
4 Inventory (BDI-II) in a large Dutch community sample. *J Psychopathol Behav Assess* 35:93–98.
- 5 Rogers RD, Monsell S (1995) Costs of a predictable switch between simple cognitive tasks. *J Exp Psychol Gen*  
6 124:207–231.
- 7 Ruge H, Jamadar S, Zimmermann U, Karayanidis F (2013) The many faces of preparatory control in task switching:  
8 reviewing a decade of fMRI research. *Hum Brain Mapp* 34:12–35.
- 9 Rugg MD, Vilberg KL (2013) Brain networks underlying episodic memory retrieval. *Curr Opin Neurobiol* 23:255–  
10 260.
- 11 Sadaghiani S, Poline J-B, Kleinschmidt A, D’Esposito M (2015) Ongoing dynamics in large-scale functional  
12 connectivity predict perception. *Proc Natl Acad Sci* 112:8463–8468 Available at:  
13 <http://www.pnas.org/lookup/doi/10.1073/pnas.1420687112>.
- 14 Sakai K, Passingham RE (2003) Prefrontal interactions reflect future task operations. *Nat Neurosci* 6:75–81.
- 15 Schaefer A, Kong R, Gordon EM, Laumann TO, Zuo X-N, Holmes AJ, Eickhoff SB, Yeo BTT (2018) Local-Global  
16 Parcellation of the Human Cerebral Cortex from Intrinsic Functional Connectivity MRI. *Cereb Cortex*  
17 28:3095–3114 Available at: <https://academic.oup.com/cercor/article/28/9/3095/3978804>.
- 18 Schultz DH, Cole MW (2016) Higher Intelligence Is Associated with Less Task-Related Brain Network  
19 Reconfiguration. *J Neurosci* 36:8551–8561 Available at:  
20 <http://www.jneurosci.org/lookup/doi/10.1523/JNEUROSCI.0358-16.2016>.
- 21 Shine JM, Bissett PG, Bell PT, Koyejo O, Balsters JH, Gorgolewski KJ, Moodie CA, Poldrack RA (2016) The  
22 Dynamics of Functional Brain Networks: Integrated Network States during Cognitive Task Performance.  
23 *Neuron* 92:544–554 Available at: <http://dx.doi.org/10.1016/j.neuron.2016.09.018>.
- 24 Shine JM, Poldrack RA (2018) Principles of dynamic network reconfiguration across diverse brain states.  
25 *Neuroimage* 180:396–405 Available at: <https://linkinghub.elsevier.com/retrieve/pii/S1053811917306572>.
- 26 Siegel JS, Mitra A, Laumann TO, Seitzman BA, Raichle M, Corbetta M, Snyder AZ (2017) Data quality influences  
27 observed links between functional connectivity and behavior. *Cereb cortex* 27:4492–4502.
- 28 Smith SM (2002) Fast robust automated brain extraction. *Hum Brain Mapp* 17:143–155.
- 29 Spector A, Biederman I (1976) Mental set and mental shift revisited. *Am J Psychol*:669–679.
- 30 van der Bij AK, de Weerd S, Cikot RJLM, Steegers EAP, Braspenning JCC (2003) Validation of the dutch short  
31 form of the state scale of the Spielberger State-Trait Anxiety Inventory: considerations for usage in screening

- 1 outcomes. *Public Health Genomics* 6:84–87.
- 2 Waskom ML, Kumaran D, Gordon AM, Rissman J, Wagner AD (2014) Frontoparietal representations of task  
3 context support the flexible control of goal-directed cognition. *J Neurosci* 34:10743–10755.
- 4 Westphal AJ, Wang S, Rissman J (2017) Episodic memory retrieval benefits from a less modular brain network  
5 organization. *J Neurosci* 37:3523–3531.
- 6 Wisniewski D, Goschke T, Haynes J-D (2016) Similar coding of freely chosen and externally cued intentions in a  
7 fronto-parietal network. *Neuroimage* 134:450–458.
- 8 Wisniewski D, Reverberi C, Tusche A, Haynes J-D (2015) The neural representation of voluntary task-set selection  
9 in dynamic environments. *Cereb Cortex* 25:4715–4726.
- 10 Woolgar A, Afshar S, Williams MA, Rich AN (2015) Flexible coding of task rules in frontoparietal cortex: an  
11 adaptive system for flexible cognitive control. *J Cogn Neurosci* 27:1895–1911.
- 12 Woolgar A, Thompson R, Bor D, Duncan J (2011) Multi-voxel coding of stimuli, rules, and responses in human  
13 frontoparietal cortex. *Neuroimage* 56:744–752.
- 14 Woolrich MW, Ripley BD, Brady M, Smith SM (2001) Temporal autocorrelation in univariate linear modeling of  
15 FMRI data. *Neuroimage* 14:1370–1386.
- 16 Yarkoni T, Poldrack RA, Nichols TE, Van Essen DC, Wager TD (2011) Large-scale automated synthesis of human  
17 functional neuroimaging data. *Nat Methods* 8:665.
- 18 Yeo BTT, Krienen FM, Sepulcre J, Sabuncu MR, Lashkari D, Hollinshead M, Roffman JL, Smoller JW, Zöllei L,  
19 Polimeni JR, others (2011) The organization of the human cerebral cortex estimated by intrinsic functional  
20 connectivity. *J Neurophysiol* 106:1125.
- 21 Zhang J, Kriegeskorte N, Carlin JD, Rowe JB (2013) Choosing the rules: distinct and overlapping frontoparietal  
22 representations of task rules for perceptual decisions. *J Neurosci* 33:11852–11862.

23

24
