# 1            **Dynamic transitions between neural states are associated with** 2                            **flexible task-switching during a memory task**

3  
4    Wei Liu<sup>1,2</sup>, Nils Kohn<sup>2</sup>, Guillén Fernández<sup>2</sup>

5  
6    1. School of Psychology, Central China Normal University (CCNU), Wuhan, China

7    2. Donders Institute for Brain, Cognition and Behaviour, Radboud University Medical Centre, Nijmegen,  
8        The Netherlands

9  
10  
11  
12  
13    **Correspondence:**

14    Wei Liu

15    School of Psychology,

16    Central China Normal University (CCNU),

17    No. 152 Luoyu Road, Hongshan District, Wuhan 430079,

18    Hubei Province, Wuhan, China.

19    E-mail: [weiliu1991@mail.ccnu.edu.cn](mailto:weiliu1991@mail.ccnu.edu.cn)

1  
2  
3  
4  
5  
6  
7  
8  
9  
10  
11  
12  
13  
14  
15  
16  
17  
18  
19  
20  
21  
22  
23

## Abstract

Flexible behavior requires switching between different task conditions. It is known that such task-switching is associated with costs in terms of slowed reaction time, reduced accuracy, or both. The neural correlates of task-switching have usually been studied by requiring participants to switch between distinct task demands that recruit different brain networks. Here, we investigated the transition of neural states underlying switching between two opposite memory-related processes (i.e., *memory retrieval and memory suppression*) in a memory task. We investigated 26 healthy participants who performed a Think/No-Think task while being in the fMRI scanner. Behaviorally, we show that it was more difficult for participants to suppress unwanted memories when a No-Think was preceded by a Think trial instead of another No-Think trial. Neurally, we demonstrate that Think-to-No-Think switches were associated with an increase in control-related and a decrease in memory-related brain activity. Neural representations of task demand, assessed by decoding accuracy, were lower immediately after task switching compared to the non-switch transitions, suggesting a switch-induced delay in the neural transition towards the required task condition. This suggestion is corroborated by an association between condition-specific representational strength and condition-specific performance in switch trials. Taken together, we provided neural evidence from the time-resolved decoding approach to support the notion that carry-over of the previous task-set activation is associated with the switching cost leading to less successful memory suppression.

**Keywords:** task switching; memory suppression; memory retrieval; cognitive control; fMRI

1  
2  
3  
4  
5  
6  
7  
8  
9  
10  
11  
12  
13  
14  
15  
16  
17  
18  
19  
20  
21

## Significance statement

Our brain can switch between multiple tasks but at the cost of less optimal performance during transition. One possible neuroscientific explanation is that the representation of the task condition is not easy to be updated immediately after switching. Thus, weak representations for the task at hand explain performance costs. To test this, we applied brain decoding approaches to human fMRI data when participants switched between successive trials of memory retrieval and suppression. We found that switching leads to a weaker representation of the current task. The remaining representation of the previous, opposite task is associated with inferior performance in the current task. Therefore, timely updating of task representations is critical for task switching in the service of flexible behaviors.

## 1 **Introduction**

2 In everyday life, we are continuously switching between different tasks (Monsell, 2003). Transitions  
3 between task conditions have often been studied using task-switching paradigms in which participants are  
4 required to switch between two or more distinct tasks (Meiran, 2010). Usually, participants perform less  
5 accurately and/or more slowly immediately after switches (i.e., *switch costs*) (Jersild, 1927; Spector and  
6 Biederman, 1976; Rogers and Monsell, 1995; Goschke, 2000). Results from univariate fMRI studies  
7 suggested the involvement of prefrontal-parietal regions in task switching (Dove et al., 2000; Braver et al.,  
8 2003; Gruber et al., 2006; Richter and Yeung, 2014). Two studies (Waskom et al., 2014; Loose et al.,  
9 2017) used multivariate fMRI methods (Haynes, 2015; Cohen et al., 2017) to investigate how task  
10 switching modulates neural representations of the current task condition but reported mixed results.  
11 Waskom and colleagues reported stronger task representations after a shift in task conditions (Waskom et  
12 al., 2014), while Loose and colleagues found no difference in task representations between the switch and  
13 the non-switch condition (Loose et al., 2017). Therefore, it is still unclear whether task switching will  
14 strengthen or weaken the task representation and how the altered task representation links to *switch costs*.  
15 Previous experiments that investigated task switching were typically designed to minimize the perceptual  
16 differences between conditions but not to maximize differences in underlying task demands (Braver et al.,  
17 2003; Kiesel et al., 2010; Waskom et al., 2014; Loose et al., 2017). For example, one task could be to  
18 judge the relative size of the presented object compared to a computer monitor (LARGE; e.g., *truck*;  
19 SMALL; e.g., *carrot*). The other task would be to judge whether the object is manmade (e.g., *truck*) or  
20 natural (e.g., *carrot*) (Braver et al., 2003). However, behavioral and neural correlates of task-switching  
21 between two opposite tasks within one cognitive domain remain largely unexplored. We reasoned that  
22 switching between two opposite task demands within one cognitive domain should require more cognitive  
23 resources than between unrelated tasks because the same set of networks need to reconfigure swiftly in  
24 how they interact with each other (e.g. *cooperation or competition between the very same networks*). In  
25 this study, we investigated task switching between memory retrieval and suppression and its associated

1 neural processes in a memory task. Cognitive and neural models of memory retrieval and suppression  
2 suggest that successful retrieval could be the result of *cooperation* between an inhibitory control network  
3 and an episodic retrieval network (Rugg and Vilberg, 2013), while effective suppression depends on top-  
4 down control of the inhibitory control network upon an episodic retrieval network (i.e., *competition*)  
5 (Anderson and Hanslmayr, 2014). Previous task-fMRI studies of memory suppression supported this idea  
6 by showing that compared to Think trials, No-Think trials are associated with stronger activation in  
7 control-related regions, including the dorsolateral prefrontal cortex, ventrolateral prefrontal cortex, inferior  
8 parietal lobule, and supplementary motor area (Anderson, 2004; Guo et al., 2018; Liu et al., 2020b). At the  
9 same time, these activity increases are accompanied by reduced activity in memory-related areas in the  
10 medial temporal lobe, including the hippocampus (Anderson and Hanslmayr, 2014). A recent resting-state  
11 fMRI study showed that individual differences in memory suppression ability could be predicted by the  
12 internetwork communication of the inhibitory control network during the task-free condition (Yang et al.,  
13 2021).

14 Here, we used a modified Think/No-Think paradigm (Anderson and Green, 2001; Levy and Anderson,  
15 2012) to probe task-switching between memory retrieval and suppression. Specifically, participants were  
16 instructed to switch between memory retrieval and memory suppression according to trial-specific  
17 instructions. We asked whether we can find behavioral *switch costs* (i.e., *less optimal memory*  
18 *performance*) when participants switch between two opposite memory tasks. If *switch costs* exist in our  
19 memory task, we would like to detect the neural source of *switch costs*. Previous cognitive theories of  
20 task-switching propose that *switch costs* could be the result of the carry-over of previous task-set  
21 activation and depends on cognitive resources required to reconfigure the task-set (Monsell, 2003). These  
22 cognitive theories can not be directly tested without the development of a series of multivariate methods to  
23 probe neural representation in non-invasive human brain imaging data (Kriegeskorte and Diedrichsen,  
24 2019). Here, we used a time-resolved multivariate decoding approach to capture the dynamic transitions  
25 between neural states (i.e., *Think: cooperation between memory and control network; No-Think:*

1 *competition between memory and control network*) during task switching in fMRI data. We hypothesized  
2 that a delayed transition between neural states that represent task conditions could be the neural  
3 underpinning of behavioral *switch costs* because failing to update neural states on time could result in a  
4 neural state that is optimal for the opposite (e.g., *retrieval*), but not the current (e.g., *suppression*) task  
5 condition. This assumption is built on the idea that the human brain can demonstrate diverse brain states  
6 during different cognitive tasks or environmental demands, and whether the brain can properly  
7 reconfigure its state is behavioral relevant (Hermans et al., 2011; Gonzalez-Castillo et al., 2015;  
8 Sadaghiani et al., 2015; Shine et al., 2016, 2019; Westphal et al., 2017; Shine and Poldrack, 2018;  
9 Cocuzza et al., 2019). The task-switching paradigm is suitable to study such a rapid neural reconfiguration  
10 process because it allows us to compare directly how different task demands are represented in neural  
11 states and how transitions of neural states are associated with human behaviors (i.e., *switch costs*).

12

## 13 **Results**

### 14 **Behavioral results**

15 Our study used a modified think/no-think (TNT) paradigm (**Figure 1A**) with trial-by-trial reports of  
16 (in)voluntary memory retrieval (i.e., retrieval/intrusion frequency rating) (Levy and Anderson, 2012). At  
17 the cue phase of each trial, the participant received a trial-specific instruction to either retrieve the memory  
18 that is associated with the cue (i.e., *Think trials*) or suppress the tendency to recall the memory (i.e., *No-*  
19 *Think trials*). Then, during the subsequent report phase, participants reported how well they just retrieved  
20 (i.e., *retrieval rating*) or suppressed the memory (i.e., *intrusion rating*). As intended, during the entire  
21 experiment (without considering the repetitions of presenting memory cues), most of the associations were  
22 successfully recalled in Think trials (1-mean  $p_{(\text{Never})}$ =84.05%, SD=11.79 %, range from 56.25% to 100%;  
23 **Figure S1A**), while participants suppressed memory retrieval successfully in No-Think trials in about half  
24 of the trials (mean  $p_{(\text{Never})}$ =50.62%, SD=25.35%, range from 4% to 92.5%; **Figure S1B**). In addition, we

1 investigated the learning/practicing effect by analyzing participants' memory retrieval and suppression  
2 performance as the function of repetition: for memory retrieval trials, the percentage of reporting "always"  
3 (i.e., *index of more successful retrieval*) increased ( $F [9, 234] = 5.3, p < 0.001, \eta^2 = 0.02$ ); for memory  
4 suppression trials, the percentage of reporting "never" (i.e., *index of more successful suppression*)  
5 increased ( $F [9, 234] = 5.4, p < 0.001, \eta^2 = 0.04$ ) from the first to the tenth repetition. These results  
6 together suggest that participants were getting more successful at retrieving or suppressing memory traces  
7 throughout the experiment.

8 Our central aim was to determine whether there were behavioral *switch costs* in the TNT task and to  
9 reveal their neural underpinnings. We defined each trial as a "switch" or "non-switch" trial considering  
10 both the task condition of the current trial and its predecessor (**Figure 1B**). Specifically, we identified  
11 "switch" trials if a preceding trial had the *opposite* task condition (e.g., previous trial: Think; current trial:  
12 No-Think; T->NT). By contrast, if the current trial and the preceding trial had the *same* task condition,  
13 then the current one was a "non-switch" trial. Within each run, the number of "switch" and "non-switch"  
14 trials are almost identical (i.e., 32 vs. 31). We compared the trial-by-trial performance between "switch"  
15 and "non-switch" trials for the Think and the No-Think condition separately. Participants showed  
16 comparable performance for "switch" and "non-switch" trials in the Think condition ( $t(25)=0.348,$   
17  $p=0.731$ , Cohen's  $d=0.068$ ; **Figure 1C**), while they reported more memory intrusions for "switch" trials  
18 compared to "non-switch" trials in the No-Think condition ( $t(25)=3.19, p=0.004$ , Cohen's  $d=0.627$ ;  
19 **Figure 1D**), suggesting *switch costs* when the task demand switched from a previous Think trial to a  
20 current No-Think trial (T->NT).

21 After the TNT task, participants performed a final memory test in which memory performance of Think  
22 trials, No-Think trials, and Control trials (i.e., associations that were learned but not presented during the  
23 TNT task) was assessed. Behavioral results from the final memory test had been reported in another  
24 publication in detail (Liu et al., 2020a) and *supplemental materials* (**Figure S2**) of this study. In this study,  
25 we used memory performance during the final memory test to quantify individual differences of

1 *suppression-induced forgetting effects*. The *forgetting effect* was defined as the differences between  
2 memory performance between the No-Think trials and Control trials in the final memory test. More  
3 specifically, we calculated individual differences in both subjective and objective *suppression-induced*  
4 *forgetting effects* based on subject and objective memory measures and correlated them with fMRI  
5 measures of neural state transitions.

6

## 7 **fMRI results**

8 To replicate the univariate neural signature of memory suppression reported in prior studies (Anderson,  
9 2004; Levy and Anderson, 2012; Anderson and Hanslmayr, 2014), we first conducted a univariate  
10 analysis to contrast brain regions engaged in memory suppression and memory retrieval (i.e., *No-Think vs.*  
11 *Think*). We found an increased activity for No-Think trials in regions that are consistently involved in  
12 memory suppression, including the bilateral dorsolateral prefrontal cortex (DLPFC), bilateral insula,  
13 bilateral inferior parietal lobule (IPL), supplementary motor area (SMA), and middle cingulate gyrus  
14 (voxelwise  $Z > 3.1$ , cluster-level  $p < .05$  FWER corrected) (**Figure 1E**; **Table S1**). Additionally, we found  
15 higher activity in ventral visual areas and the right thalamus during No-Think compared to Think trials.  
16 Next, we contrasted the Think condition with the No-Think condition and found the increased activity for  
17 the Think condition in a set of regions including the medial prefrontal cortex (mPFC), posterior cingulate  
18 cortex (PCC), hippocampus, inferior parietal lobule (IPL), precuneus, angular gyrus, and cerebellum  
19 (voxelwise  $Z > 3.1$ , cluster-level  $p < .05$  FWER corrected) (**Figure 1F**; **Table S2**). Together with the  
20 behavioral results from the final memory test, these results confirmed that participants in our experiment  
21 followed task instructions, leading to univariate neural signatures of memory retrieval and suppression  
22 consistent with prior findings (Anderson, 2004; Levy and Anderson, 2012; Anderson and Hanslmayr,  
23 2014), as well as recent meta-analyses of memory suppression (Guo et al., 2018; Liu et al., 2020b).



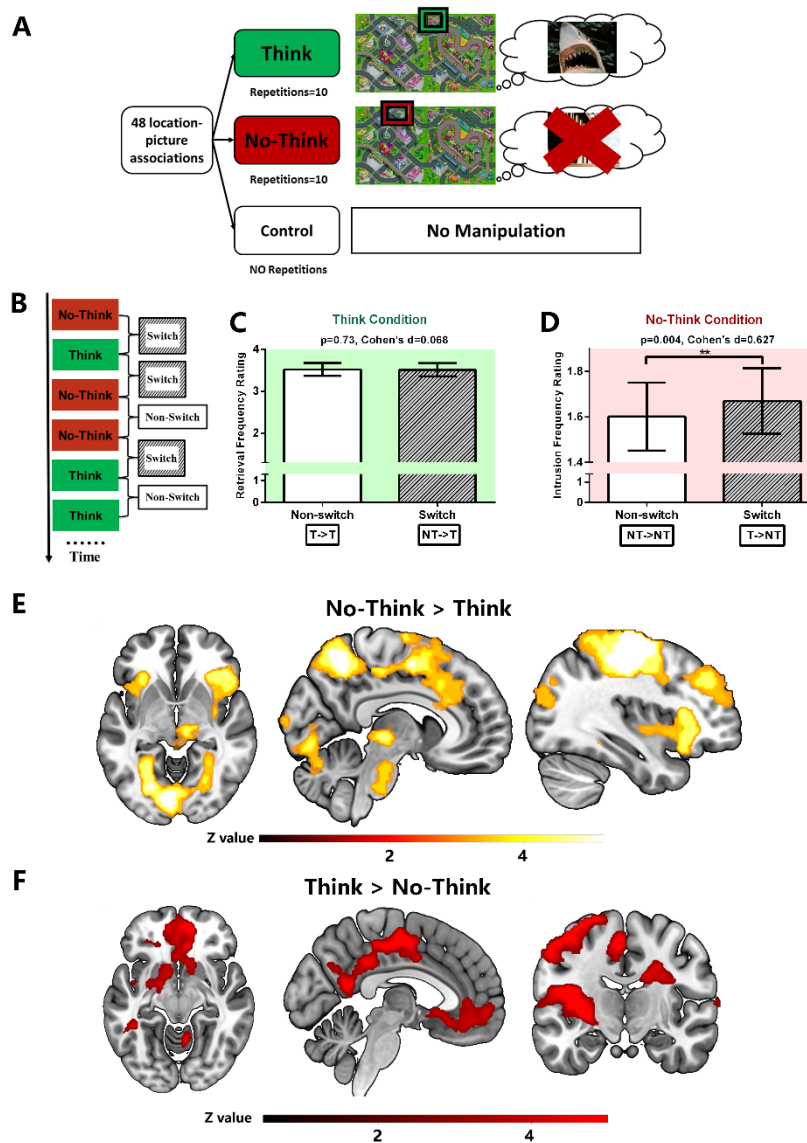

1  
 2 **Figure 1** (A) After learning 48 location-picture associations, participants performed a Think/No-Think task while  
 3 brain activity was measured by fMRI. During think trials, participants were instructed to retrieve associated pictures  
 4 based on the highlighted locations as memory cues. By contrast, during no-think trials, participants were required to  
 5 suppress the tendency to retrieval the associated pictures. (B) The sequence of trials was designed to probe task  
 6 switching between two task demands (i.e., Think and No-Think). When the task demand of the current trial was the  
 7 same as the previous trial, it was defined as the “Non-switch” trial. By contrast, while the task demand of the current  
 8 differed from the previous trial, it was defined as the “switch” trial. (C) During Think trials, participants  
 9 demonstrated comparable memory retrieval performance ( $p=0.73$ , Cohen’s  $d=0.068$ ) for both “switch” (*No-Think-to-*  
 10 *Think*; *NT->T*) and “Non-switch” (*Think-to-Think*; *T->T*) trials. (D) During No-Think trials, participants reported  
 11 worse memory suppression performance, indexed by more memory intrusions for “switch” trials (*Think-to-No-Think*;  
 12 *T->NT*) compared to “non-switch” trials (*No-Think-to-No-Think*; *NT->NT*) ( $p=0.004$ , Cohen’s  $d=0.627$ ). (E) Brain  
 13 regions showed increased activation during No-Think trials compared to Think trials. (F) Brain regions showed  
 14 increased activation during Think trials compared to No-Think trials. *Whole-brain brain imaging was thresholded at*  
 15 *voxelwise  $Z>3.1$ , cluster-level  $p < .05$  FWER corrected. For (C) and (D), Bar charts demonstrated the Mean and 95%*  
 16 *Confidence Interval (CI) of the switch and non-switch conditions. For (E) and (F), unthresholded statistical maps*  
 17 *can be found in the corresponding Neurovault Repository (see Data Availability) for 3D visualization.*

## 1 **The transition of large-scale neural states from memory retrieval to memory suppression**

2 Based on neurocognitive models of memory suppression (Anderson and Hanslmayr, 2014), we focused on  
3 the neural dynamics within the inhibitory control network and the memory retrieval network. First, we  
4 used *Neurosynth* (<https://neurosynth.org/>), an automatic meta-analysis tool of neuroimaging data (Yarkoni  
5 et al., 2011), to identify the inhibitory control network and memory retrieval network independently from  
6 our fMRI data. Using the term “*inhibitory control*” and “*memory retrieval*,” we performed term-based  
7 meta-analyses to reveal two distinct brain networks of inhibitory control (**Figure S3A**) and memory  
8 retrieval (**Figure S3B**) separately. The two meta-analytic maps have *overlapping* areas, including the IFG,  
9 insular, SMA, inferior parietal lobule (**Figure S3C**). Interestingly, the latter areas are highly similar to a  
10 “task switching” map generated by *Neurosynth* using the term “*task switching*” (**Figure S3D**).

11 In the next step, we tried to identify individual brain regions within the *inhibitory control*, *memory*  
12 *retrieval*, and *overlapping* networks. Based on the combination of a connectivity-based neocortical  
13 parcellation (number of parcels=300) (Schaefer et al., 2018) and subcortical regions (number of  
14 regions=14) (*Details see Methods*), we identified 71 regions (i.e., *memory-related regions*) within the  
15 *memory retrieval* network, 29 regions (i.e., *control-related regions*) within the *inhibitory control* network,  
16 were categorized as, and 10 regions (i.e., *overlapping regions*) within the *overlapping* network (**Figure**  
17 **2A**). Finally, for each of the 110 regions, the BOLD time series were extracted from each voxel, averaged  
18 within each region, and further processed.

19 Using these time series, we characterized the group-average transition of neural states when the task  
20 demand changed from Think to No-Think trials (**Figure 2B**). Based on the task instruction, the time series  
21 were firstly split for the Think and No-Think conditions separately and then concatenated across all runs  
22 of all participants. For each task demand, all regions were ranked (*the highest activity was ranked first*)  
23 based on their state-specific averaged neural activity across runs to represent their relative dominance  
24 during that neural state (i.e., *Think or No-Think*). A Kruskal-Wallis test showed that during Think trials,  
25 *memory-related regions*, *control-related regions*, and *overlapping regions* differed in their ranks (H(2)

1 =40.48,  $p < 0.001$ ). Post-hoc Mann-Whitney tests using a Bonferroni-adjusted alpha level of 0.017 (0.05/3)  
2 were used to compare all group pairs. *Memory-related regions* (mean<sub>memory</sub>=40.22, SD<sub>memory</sub>=27.39)  
3 ranked higher than *control-related regions* (mean<sub>control</sub>=82.34, SD<sub>control</sub>=22.28) and *overlapping regions*  
4 (mean<sub>overlap</sub>=75.10, SD<sub>overlap</sub>=19.08) (memory-related vs. control-related:  $U=263$ ,  $p < 0.001$ ; memory-  
5 related vs. overlapping:  $U=108$ ,  $p < 0.001$ ). *Control-related regions* and *overlapping regions* did not differ  
6 significantly in their ranks ( $U=104$ ,  $p=0.096$ ). Three types of regions also differed in their ranks during  
7 No-Think trials ( $H(2) = 36.60$ ,  $p < 0.001$ ). *Memory-related regions* (mean<sub>memory</sub>=67.96, SD<sub>memory</sub>=27.94)  
8 ranked lower than *control-related regions* (mean<sub>control</sub>=27.24, SD<sub>control</sub>=23.13) and *overlapping regions*  
9 (mean<sub>overlap</sub>=37.80, SD<sub>overlap</sub>=21.10) (memory-related vs. control-related:  $U=238$ ,  $p < 0.001$ ; memory-  
10 related vs. overlapping:  $U=144$ ,  $p=0.001$ ). *Control-related regions* and *overlapping regions* did not differ  
11 significantly in their ranks ( $U=101$ ,  $p=0.081$ ). All comparisons between *memory-related* and *control-*  
12 *related/overlapping regions* were significant after Bonferroni-adjustment (all  $p_s \leq 0.001$ ). Furthermore,  
13 we performed additional analyses of neural state transition by dividing all regions into three groups (i.e.,  
14 *increased group*, *stable group*, and *decreased group*) based on their relative changes in rank (See  
15 *Supplemental Material- Additional analyses of Think-to-NoThink neural state transition*). In short, when  
16 the task demand changed from Think to No-Think, *memory-related regions* showed decreases while  
17 *control-related regions* demonstrated an increase in their activity ranks.

18 For control purposes, the same analysis was repeated for raw signal intensities (**Figure S4B**) and their Z-  
19 values (**Figure S4C**) and yielded similar patterns. Here, we present parametric paired t-tests of Z-values to  
20 further validate our findings based on ranks: *control-related regions* demonstrated increased (Think>No-  
21 Think:  $t(28)=4.79$ ,  $p < 0.001$ , Cohen's  $d=0.89$ ) while *memory-related regions* showed decreased (No-  
22 Think>Think:  $t(70)=4.00$ ,  $p < 0.001$ , Cohen's  $d=0.48$ ) neural activity during the Think-to-No-Think  
23 transition. Furthermore, we analyzed the average signal within the default mode network (DMN), a  
24 functional network that is largely involved in memory retrieval, and found that DMN was less activated  
25 during the No-Think compared to the Think condition ( $t(25)=-3.24$ ,  $p=0.003$ , Cohen's  $d=0.63$ ).

## 1 **The transition of neural states during the TNT task is associated with subsequent suppression-** 2 **induced forgetting**

3 We already demonstrated that the activity of *control-related regions* increased, and the activity of  
4 *memory-related regions* decreased when the task conditions switched from Think to No-Think. To assess  
5 if these changes in neural states are associated with the behavioral consequence of memory suppression  
6 (i.e., *suppression-induced forgetting effect*), we quantified this neural state transition at the individual level  
7 and examined whether individual differences in the neural state transition predict individual subsequent  
8 suppression-induced forgetting measures (i.e., *subjective and objective suppression score*). The subjective  
9 and objective *suppression score* was calculated by subtracting the memory measure (i.e., *confidence*  
10 *rating or recall accuracy respectively*) of suppression associations (i.e., “No-Think” items) from control  
11 associations separately.

12 Based on the group-level fMRI results, we calculated a *state transition index* to represent the degree of  
13 neural transition during the TNT task for each participant. The state transition index was calculated by  
14 adding up the averaged relative decreases (*absolute values for decreased values*) in ranks of all *memory-*  
15 *related regions* and the averaged relative increase in the rank of all *control-related regions* during the  
16 Think to No-Think transition. The larger the state transition index represents the larger decrease for  
17 *memory-related regions* and the larger increase for *control-related regions*. The *state transition index*  
18 tended to be positively correlated with individual differences in *objective suppression scores* ( $r=0.36$ ,  
19  $p=0.06$ ; **Figure 2C**), and *subjective suppression scores* ( $r=0.38$ ,  $p=0.05$ ; **Figure 2D**). For validation  
20 purposes (*not an independent analysis*), we used an alternative method (i.e., *state transition index*  
21 *Version2(V2)*) to measure neural state transitions for each participant. This method was based on  
22 additional analyses of Think-to-No-Think neural state transition (See *Supplemental Materials for details*  
23 *of state transition index calculation and results*): all regions were divided into three groups (i.e., *increased*  
24 *group, stable group, and decreased group*) based on their relative changes in ranks. The state transition  
25 index V2 was calculated as the sum of the percentage of *memory-related regions* within the *decreased*

1 group and the percentage of *control-related regions* within the *increased group*. Similarly, a larger  
2 transition index V2 suggests the stronger Think-to-No-Think neural transition (i.e., *decreasing activity*  
3 *memory-related regions while increasing activity for control-related regions*). We also found the same  
4 significant correlations between *state transition index V2* and both *objective* and *subjective suppression*  
5 *scores* (**Figure S5**). These results suggested that the transition of neural states during the TNT task is  
6 relevant for the subsequent *suppression-induced forgetting effects* measured in the final memory test.

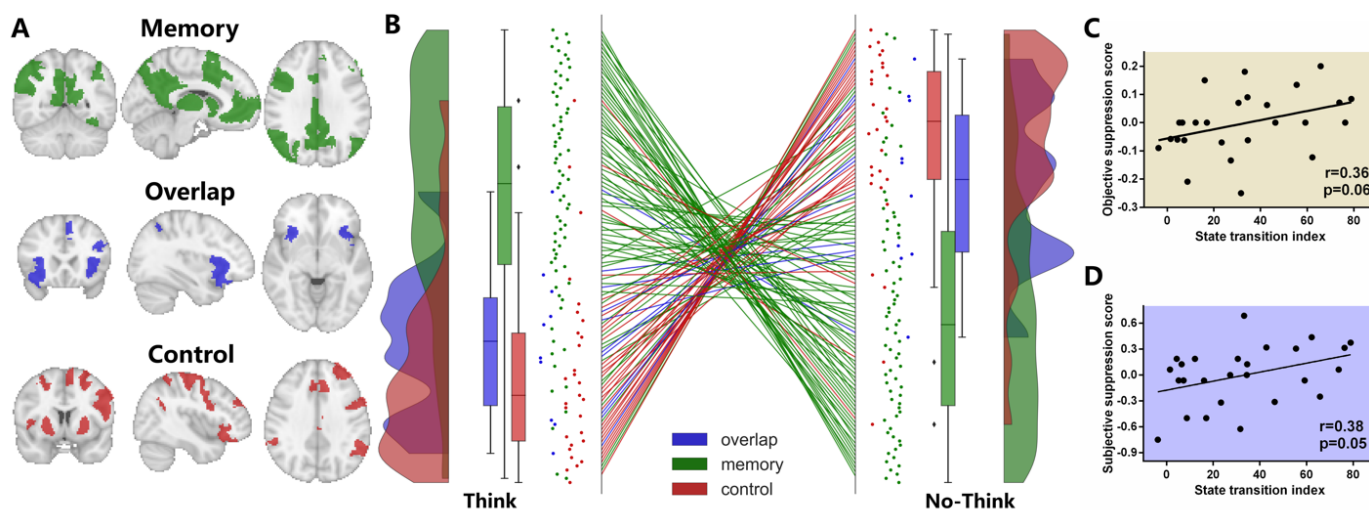

7  
8 **Figure 2** (A) Memory retrieval network (GREEN) and inhibitory control network (RED) was defined using the  
9 *Neurosynth* independent of fMRI data analyzed in this study. The overlap between the two brain networks was  
10 defined as the overlapping network (BLUE). (B) When the task demand switched from Think to No-Think, the  
11 activity of brain regions within the inhibitory control network increased, while the activity of brain regions within the  
12 memory retrieval network decreased. Y-axis is the rank of neural activity among 110 regions. The top of the axis  
13 represents the highest rank (i.e., strongest activity). Each dot is a brain region. (C) Individual differences in the  
14 neural state transition tended to correlate with the objective suppression-induced forgetting effect during subsequent  
15 memory retrieval task ( $r=0.36$ ,  $p=0.06$ ). (D) The same index also tended to correlate with the subjective suppression-  
16 induced forgetting effect ( $r=0.38$ ,  $p=0.05$ ).

17

## 18 Switch of task demand is accompanied by the delayed transition between neural states

19 The large-scale neural states transition described above was based on all neural data available, which  
20 means non-switch trials were also included and analyzed. To reveal how neural representations of task  
21 conditions change during task switching, we used a multivariate decoding method to track the dynamics of  
22 neural state transitions on a time point-by-time point basis (**Figure 3A**). By doing this, each time point can

1 be labeled as “*switch*” or “*non-switch*,” and therefore, the effect of task switching on the neural  
2 representation of task condition can be examined at the temporal resolution of each fMRI volume. Linear  
3 Support Vector Classification (SVC) was used to classify the underlying neural states (i.e., *Think vs. No-*  
4 *Think*) based on the fMRI activity intensity of all 110 regions at each given time point. Participant-specific  
5 classifiers were fitted on neural, and task demand data from N-1 runs (i.e., *four runs*) and tested on the one  
6 remaining test run. Then the decoding accuracy was evaluated for each TNT run by comparing the  
7 decoded task demands with the actual demands. Averaged across runs, we were able to decode task  
8 demands based on multivariate regional neural activity with a mean accuracy of 59.5% (SD=3.9% range  
9 from 52.5% to 67.1%) (**Figure 3B**). This accuracy is significantly higher than the chance level (i.e., 50%)  
10 ( $t(25)=12.5$ ,  $p<0.001$ , Cohen’s  $d=2.453$ ). Because we identified the learning/practicing effect at the  
11 behavioral level (i.e., *participants were getting better at retrieving/suppressing memories with repetitions*).  
12 Here, we asked whether such behavioral effects could affect the accuracies of our neural state decoding.  
13 We found that although participants’ behavioral performance improved from the first run to the last run,  
14 decoding accuracies of five runs did not differ from each other ( $F [4, 96] = 2.19$ ,  $p= 0.075$ ,  $\eta^2 = 0.08$ ).  
15 Admittedly, the effect of repetition on the neural decoding is close to being significant (i.e., *decreasing,*  
16 *not as expected increasing, decoding accuracies throughout the experiment*). This tendency raised two  
17 things to be noted: first, because we were using the leave-one-run-out cross-validation, which assumes  
18 each run is an identical replication, the close-to-be-significant repetition effect here partly violated the  
19 assumption. Second, we suspected that the tendency of decreasing decoding accuracies may suggest that  
20 the learning/practicing process led to a less typical neural state for each task condition, and therefore  
21 allows more flexible neural state transition corresponding to the switching of external task conditions.  
22 That is the reason why we observed improved behavioral performance but a non-significant tendency of  
23 less accurate neural decoding.

24 We further generated the confusion matrix of our decoding analysis to quantify all types of correct and  
25 incorrect classifications (**Figure 3C**): 57.9% (SD=4.1%, range from 50.6% to 65.7%) of Think time points



1 were correctly classified as Think. Among all No-Think time points, 61.1% (SD=3.9%, range from 53.9%  
2 to 68.4%) of them were correctly classified as No-Think. To reveal the relative contribution of each region  
3 to this decoding performance, we visualized the neural state-predictive pattern (i.e., SVC discriminating  
4 weights) in **Figure 3D**, which revealed a frontoparietal network of strong task demand representation,  
5 including the dorsal anterior cingulate cortex (dACC), DLPFC, IFG, superior, and inferior parietal lobule  
6 (**Table S3**). These regions were largely similar to the *overlapping network* (**Figure S6**).

7 To reveal how the switch of task conditions affected underlying neural state transitions, we calculated the  
8 decoding accuracy for “switch” and “non-switch” time points separately. Higher decoding accuracy  
9 represented a timely update of neural states according to the current task condition, thus stronger neural  
10 representation of task condition. Compared to “switch” time points, the task condition of “non-switch”  
11 time points can be decoded more accurately ( $t(25)=7.1$ ,  $p<0.001$ , Cohen’s  $d=1.39$ ; **Figure 3E**). That is to  
12 say, time points within No-Think trials following a Think trial were more often misclassified as Think  
13 trials compared to a No-Think trial following another No-Think trial. This pattern of results was also  
14 observed for Think trials.

15

16

17

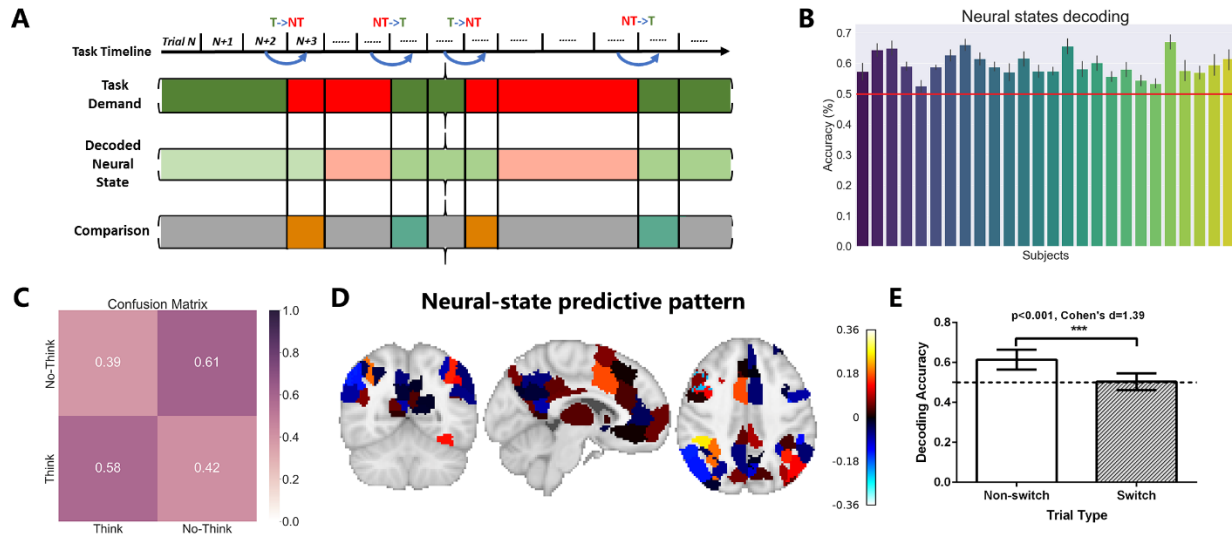

1  
2 **Figure 3 (A)** Neural state decoding analysis. We trained the decoder based on large-scale brain network activity to  
3 classifier the task demand represented in the brain. We hypothesized that immediately after the switch of the task  
4 demand, the transition of the underlying neural state could be delayed. Therefore, the task demand could be  
5 misclassified as the opposite by the decoder. The real task demand was compared with the decoded neural state. The  
6 correctly decoded moments were labeled as “match” (e.g., Think as Think), while incorrectly decoded moments were  
7 defined as “mismatch” (e.g., Think as No-Think). **(B)** Decoding accuracies were presented for each participant and  
8 against the chance level of 50%. **(C)** Confusion matrix for four types of classification results. On average, 39% of the  
9 Think moments were labeled as No-Think, and 42% of the No-Think moments were regarded as Think moments by  
10 the decoder. These were the so-called “mismatch” moments depicted in Figure 3A. **(D)** The contribution of different  
11 brain regions during the decoding. This predictive pattern mainly includes the dACC, DLPFC, IFG, superior, and  
12 inferior parietal lobule. **(E)** More “mismatch” moments were found immediately after the task switching, indexed by  
13 the lower decoding accuracies during the switch compared to non-switch moments ( $p < 0.001$ , Cohen's  $d = 1.39$ ). *The*  
14 *dotted line represented the chance level (i.e., 50%) for decoding.*

15  
16 **Stronger post-switch adaptive representation mitigates switch costs during the No-Think-to-Think**  
17 **transition**

18 At the behavioral level, we found the *switch costs* during the Think-to-No-Think transition (i.e., T->NT),  
19 but not during the No-Think-to-Think transition (i.e., NT->T). Here, we asked whether this behavioral  
20 asymmetry can be explained neurally. Since our neural state decoding was performed on individual fMRI  
21 time points, to explore how task switching differentially affects the temporal dynamics of task  
22 representation within No-Think and Think trials, we analyzed decoding accuracies as the function of time  
23 (i.e., TR) separately for No-Think and Think trials (**Figure 4A-4B**). We found an asymmetric effect of  
24 task switching on the temporal dynamics of task representations for the Think and No-Think conditions.



1 Specifically, a stronger post-switch adaptive task representation was selectively found after the No-Think-  
2 to-Think transition. Although the task representations are weakly represented at the beginning (TR=1:  
3  $t(25)=-6.26$ ,  $p<0.001$ , Cohen's  $d=1.22$ ) (i.e., “*delay*” effects), it was better represented halfway during the  
4 trials (i.e., “*adaptation*” effects), mainly the response phase, compared to the no-switch trials (TR=3:  
5  $t(25)=5.79$ ,  $p<0.001$ , Cohen's  $d=1.13$ ; TR=4:  $t(25)=2.5$ ,  $p=0.019$ , Cohen's  $d=0.49$ ; TR=5:  $t(25)=2.96$ ,  
6  $p=0.007$ , Cohen's  $d=0.58$ ; **Figure 4A**). By contrast, for the No-Think condition, although there was also a  
7 “*delay*” effect immediately after the switch (TR=1:  $t(25)=-3.33$ ,  $p=0.003$ , Cohen's  $d=0.65$ ), post-switch  
8 adaptation did not exist: task representations only differed at the beginning, and then became comparable  
9 during the response and fixation phase (**Figure 4B**).

10 Furthermore, we calculated the differences in decoding accuracies by subtracting accuracies of the switch  
11 condition from the non-switch condition (i.e.,  $\text{Accuracies}_{\text{non-switch}} - \text{Accuracies}_{\text{Switch}}$ ) and plotted them as  
12 the function time for demonstration purposes (**Figure 4C**). To identify potential interactions, we compared  
13 these differences of accuracies between Think and No-Think trials using a 2-by-2 ANOVA  
14 (Think/NoThink $\times$ Switch/Non-Switch). There was a significant interaction effect only when the TR equals  
15 3 ( $F(1,25)=12.53$ ,  $p=0.002$ ,  $\eta^2=0.07$ ): decoding accuracies for the switch and non-switch condition did not  
16 differ in No-Think trials ( $t=-1.49$ ,  $p_{\text{holm}}=0.28$ ), whereas decoding accuracies for the switch condition was  
17 higher than the non-switch condition in Think trials ( $t=6.76$ ,  $p_{\text{holm}}<0.001$ ). To further support the idea that  
18 that higher decoding accuracies during Think trials reflect stronger task representation, and therefore, can  
19 facilitate memory retrieval, we correlated individual differences in decoding accuracies (when there were  
20 marked “*adaptation*” effects) with memory retrieval/suppression performance. We showed that  
21 individuals who demonstrated stronger “*adaptation*” effects, indexed by higher decoding accuracies,  
22 performed better at memory retrieval (*switch condition*:  $r=0.44$ ,  $p=0.02$ ; *non-switch condition*:  $r=0.43$ ,  
23  $p=0.02$ ), but not memory suppression (*switch condition*:  $r=-0.09$ ,  $p=0.64$ ; *non-switch condition*:  $r=-0.16$ ,  
24  $p=0.43$ ) (**Figure S7**). Although this correlation needs to be interpreted with caution and only regarded as

1 preliminary evidence because our sample size is modest (N=26), it suggests the task-specific association  
2 between adaptive representational strength and memory retrieval.

3

#### 4 **Mismatches between task demand and underlying neural state relate to trial-by-trial memory** 5 **performance**

6 We have already shown the association between decoding accuracies and behaviors in cross-participant  
7 analyses. Next, we sought to further link the underlying neural state to memory performance on a trial-by-  
8 trial basis. Unlike most of the decoding analyses, which usually focused on the accuracy of the classifier,  
9 here, we were particularly interested in the relationship between misclassified moments and their  
10 behavioral consequences (i.e., *switch costs*). We already demonstrated that these misclassifications were  
11 largely induced by task switching, and we predicted that this mismatch could be the neural source of  
12 behavioral *switch costs*. To test this idea, we averaged the trial-by-trial performance measures (i.e.,  
13 retrieval frequency rating for Think trials and intrusion frequency rating for No-Think trials) for four  
14 situations at issue (i.e., *Think-Correct classification*, *Think-Incorrect classification*, *No-Think- Correct*  
15 *classification*, and *No-Think- Incorrect classification*) within switch trials.

16 We found that participants' behavioral performance was impaired during these mismatch moments (i.e.,  
17 *incorrect classifications*) (mean<sub>incorrect</sub>=43.9%; SD<sub>incorrect</sub>=2.6%; ranging from 38.5% to 49.8% of all  
18 classifications)) immediately after task switches. Specifically, during the Think condition, when neural  
19 states were mistakenly classified as No-Think, the retrieval frequency rating was lower ( $t(25)=-3.57$ ,  
20  $p=0.001$ ,  $d=0.701$ ; **Figure 4D**) compared to the situation in which task demands matched with the neural  
21 state. During No-Think trials, if neural states were erroneously decoded as Think, participants reported  
22 higher intrusion frequency rating ( $t(25)=3.08$ ,  $p=0.005$ ,  $d=0.606$ ; **Figure 4E**) compared to the situation in  
23 which classifications were correct.

1 In our exploratory analyses, we found that such mismatch moments not only occurred during the task-  
 2 switching but were also observed (*but less frequently*) during non-switch trials. Using the same decoding  
 3 method but focusing on non-switch time points, we found a similar detrimental effect of mismatch on  
 4 behavioral performance (**Figure S8**). These findings suggested that spontaneous, uninstructed neural state  
 5 fluctuations that do not fit current task demands also have behavioral impacts.

6

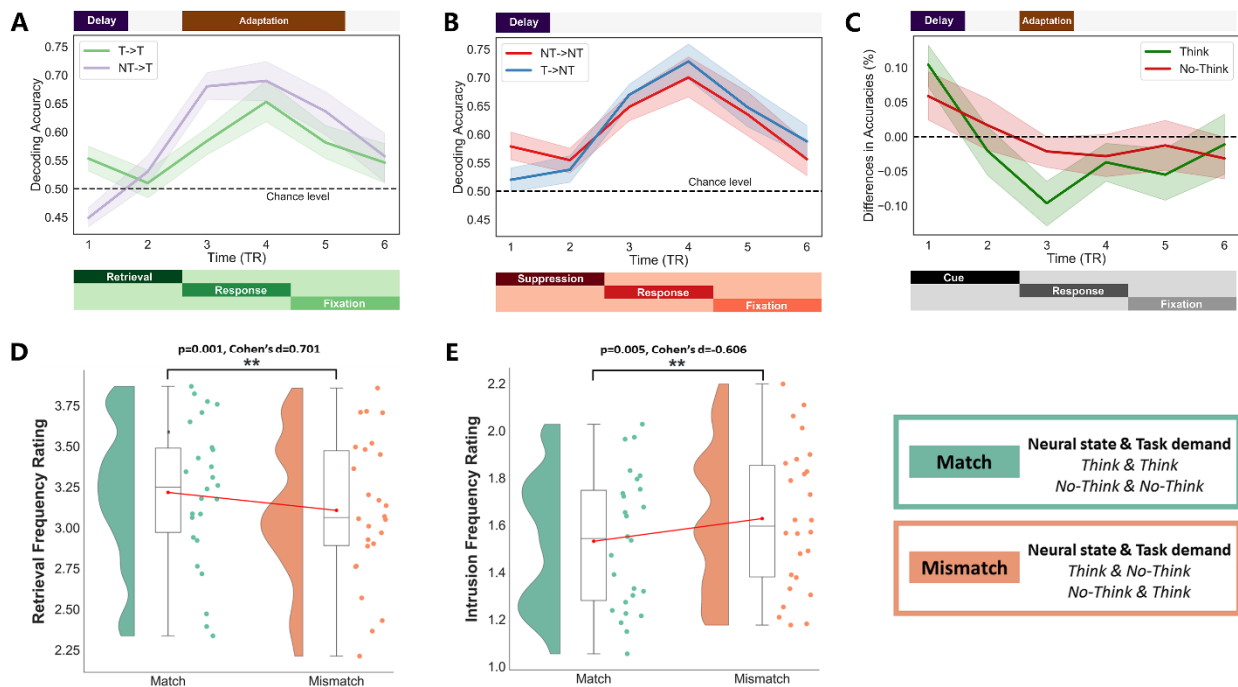

7

8 **Figure 4 Time-revolved neural decoding of the task representation and the behavioral relevance of**  
 9 **misclassification.** (A) Decoding accuracies of time points during the Think condition. Lower decoding accuracies  
 10 (i.e., “*delay*” effects) were found immediately after the switch (i.e., *No-Think-to-Think*, *NT->T*) compared to the  
 11 non-switch condition, while higher decoding accuracies (i.e., “*adaptation*” effects) were found for switch compared  
 12 to non-switch condition during the middle of the trials (i.e., *response phase*). (B) Decoding accuracies of time points  
 13 during the No-Think condition. Lower decoding accuracies (i.e., “*delay*” effects) were found immediately after the  
 14 switch (i.e., *Think-to-No-Think*, *T->NT*). Decoding accuracies were comparable between switch and non-switch  
 15 during the response and fixation phase. (C) Comparisons of differences in decoding accuracies as the function of  
 16 time between Think and No-Think condition. Differences were calculated by subtracting accuracies of the switch  
 17 condition from the non-switch condition. Therefore, positive values (i.e., *non-switch>switch*) represented the switch-  
 18 induced delay in the neural state transition, whereas negative values (i.e., *switch>non-switch*) signified the post-  
 19 switch adaptive representation. *Note: this figure was made only for demonstration, the 2-by-2 ANOVA*  
 20 *(Think/NoThink\*Switch/Non-Switch) was performed to statistically test the group differences of differences.* (D)  
 21 Memory retrieval data from Think trials. After the task switching, when the decoded neural state did not match with  
 22 the task demand (i.e., *Neural state=No-Think; Task demand=Think*), participants reported worse memory retrieval  
 23 performance ( $p<0.001$ , Cohen’s  $d=0.70$ ). (E) Memory suppression data from No-Think trials. When the neural  
 24 decoder misclassified No-Think moments as Think (i.e., *Neural state=Think; Task demand=No-Think*), participants  
 25 reported more memory intrusions during No-Think trials ( $p=0.005$ , Cohen’s  $d=0.606$ ).

## 1 **Applying alternative classifier training procedures did not change our findings**

2 For the neural state decoding results presented above, we trained the classifier based on all individual  
3 fMRI time points, including not only memory-related phases (i.e., *retrieval or suppression*) but also the  
4 response and fixation phase. This was based on our assumption that the neural representation of the  
5 current task condition remained active during the entire trial and only changed when task demands  
6 switched. One may argue that including time points beyond the mere memory-related phases (e.g.,  
7 *response phase*) may bias the decoding analyses. To rule out this possibility, we re-trained our classifiers  
8 using an alternative training procedure (A) and tried to replicate our key findings. More specifically, (1)  
9 we restricted our classifier training and testing to time points during memory-related phases only (i.e.,  
10 *retrieval or suppression*), (2) based on trial-by-trial memory performance, we further excluded time points  
11 when memory retrieval or suppression was unsuccessful. Classifiers that were trained based on the  
12 described alternative procedure can still decode task demands significantly higher than the chance level  
13 ( $t(25)=4.92$ ,  $p<0.001$ , Cohen's  $d=0.96$ ). When we compared decoding accuracies between “switch” and  
14 “non-switch” trials, we found a switch-induced delay in neural state transitions again: lower decoding  
15 accuracy for switch trials compared to no-switch trials ( $t(25)=-2.42$ ,  $p=0.02$ , Cohen's  $d=0.47$ ). Lastly, we  
16 also revealed the behavioral relevance of the misclassified time points: when the No-Think trials were  
17 misclassified as Think trials, participants reported more memory intrusions ( $t(25)=3.10$ ,  $p=0.005$ , Cohen's  
18  $d=0.60$ ); when the Think trials were mistakenly labeled as No-Think trials, participants tended to report  
19 lower rates of memory recall ( $t(25)=-1.98$ ,  $p=0.058$ , Cohen's  $d=0.39$ ).

20 Another potential bias in our classifier training relates to the fact that we used more No-Think time points  
21 for the training than Think time points ( $t(25)=4.56$ ,  $p<0.001$ , Cohen's  $d=0.89$ ). Therefore, classifiers may  
22 be better suited to identify a “No-Think” state (i.e., *suppression state*). To control this factor, we included  
23 a subsampling balancing step before classifier training: for each participant, we randomly excluded No-  
24 Think data points to make sure that an equal number of Think and No-Think time points were used for the  
25 model training. At the same time, the original temporal sequence of the training data/label was

1 reorganized. The latter ensures that the classifier was never aware of the actual order of the trial  
2 presentation, which should minimize the potential effects of temporal autocorrelation in the fMRI data on  
3 time-resolved decoding analyses. We re-trained classifiers and again using the described alternative  
4 training procedure (B) and replicated our three key findings: (1) classifiers can decode task condition  
5 better than chance level ( $t(25)=4.97$ ,  $p<0.001$ , Cohen's  $d=0.97$ ); (2) but the decoding tended to be less  
6 accurate after task switches ( $t(25)=-1.83$ ,  $p=0.07$ , Cohen's  $d=0.35$ ); (3) participants' performances was  
7 worse during misclassified time points compared to the correctly classified time points (lower memory  
8 recall: ( $t(25)=-1.72$ ,  $p=0.09$ , Cohen's  $d=0.33$ ; more memory intrusions: ( $t(25)=2.99$ ,  $p=0.006$ , Cohen's  
9  $d=0.89$ ).

10 Lastly, we asked whether our decoding analyses are contingent on using the specifically defined memory  
11 and inhibition networks from the Neurosynth. A recent study attempted to understand neural state  
12 transitions during task performance using whole-brain patterns of activity (Shine et al., 2019). To  
13 investigate if the delay in the neural state transitions is the network-specific or whole-brain representation,  
14 we trained our classifier based on neural activities from all 314 parcels. We found that (1) whole-brain  
15 representation can still allow us to decode task conditions at a similar level of network-specific decoding  
16 (mean<sub>whole-brain</sub>=59.9%, SD<sub>whole-brain</sub>=4.7%; ranging from 44.5% to 68.4%; mean<sub>network-specific</sub>=59.1%, SD  
17 <sub>network-specific</sub>=4.7%; ranging from 45.7% to 67.1%); (2) whole-brain representation was delayed after task  
18 switches ( $t(25)=-7.83$ ,  $p<0.001$ , Cohen's  $d=1.53$ ); (3) misclassified moments were also associated with  
19 impaired memory performance (lower memory recall: ( $t(25)=-4.91$ ,  $p<0.001$ , Cohen's  $d=0.96$ ; more  
20 memory intrusions: ( $t(25)=4.69$ ,  $p<0.001$ , Cohen's  $d=0.92$ ).

21 In sum, we re-trained our decoding models to investigate whether our results are robust to three alternative  
22 classifier training procedures. Although some of the statistical tests failed to reach significance, they  
23 showed numerical trends towards our original findings, and our key decoding results can be replicated  
24 across different classifier training procedures. This outcome suggests that our conclusions are independent  
25 of specific methodological choices during classifier training.

## 1 **Neural state transitions are not the results of differences in head motion**

2 We observed large-scale neural state transitions during the TNT task. Individual differences in these  
3 transitions were associated with the subsequent suppression-induced forgetting effect. There is a  
4 possibility that these neural state transitions are based on artifacts caused by different levels of participants'  
5 head motion (Siegel et al., 2017; Huang et al., 2018) between Think and No-Think trials since more  
6 inhibitory control resource was required for No-Think trials compared to Think trials (Anderson and  
7 Green, 2001; Anderson and Hanslmayr, 2014). Therefore, we examined the relationship between head  
8 motion, neural state transitions, and behaviors to rule out this alternative explanation.

9 We analyzed the time series of head motion (i.e., *framewise displacement (FD)* (Power et al., 2012))  
10 during the TNT task. First, there is no significant difference in mean FD values between Think and No-  
11 Think trials ( $FD_{\text{Think}}=0.149$  (SD=0.047);  $FD_{\text{No-Think}}=0.149$  (SD=0.046);  $t(25)=0.30$ ,  $p=0.76$ , Cohen's  
12  $d=0.06$ ). Second, for each participant, we calculated differences between the head motion of Think and  
13 No-Think trials (i.e.,  $FD_{\text{Think}}-FD_{\text{No-Think}}$ ) and found no correlation between these differences and *state*  
14 *transition indices* ( $r=-0.3$ ,  $p=0.12$ ), *objective suppression scores* ( $r=-0.14$ ,  $p=0.46$ ) or *subjective*  
15 *suppression scores* ( $r=-0.23$ ,  $p=0.25$ ). Third, we asked whether head motion could affect our neural state  
16 decoding analysis. The head motion level tended to be lower ( $t(25)=-1.96$ ,  $p=0.06$ ,  $d=0.38$ ) for correct  
17 decoding ( $FD_{\text{correct}}=0.147$ ; SD=0.045), compared to incorrect decoding ( $FD_{\text{incorrect}}=0.151$ ; SD=0.048). This  
18 difference raised the question of whether the lower decoding accuracy for switch compared to non-switch  
19 condition resulted from higher head motion instead of differences in the neural representation related to  
20 task demands. Therefore, we also compared head motions between the switch and the non-switch  
21 conditions. In fact, we found that head motion is even lower in the switch condition ( $FD_{\text{switch}}=0.145$   
22 (SD=0.048);  $FD_{\text{non-switch}}=0.150$  (SD=0.047);  $t(25)=3.35$ ,  $p=0.003$ ,  $d=0.65$ ). This result ruled the head  
23 motion out as an alternative explanation for the lower decoding accuracy for the switch condition. If the  
24 lower decoding accuracy during switching was dominantly driven by excessive head motion, we would  
25 observe relatively higher instead of lower head motion during switching. In sum, analyses of head motion

1 suggest that our neuroimaging results are not likely to be the consequence of variations in head motions  
2 between task conditions.

3

#### 4 **Discussion**

5 Task switching is a crucial cognitive ability that has been intensively studied using behavioral and  
6 neuroimaging methods (Meiran, 2010; Ruge et al., 2013; Richter and Yeung, 2014). Here, we investigated  
7 the task switching process between memory retrieval and suppression and demonstrated that memory  
8 suppression is more difficult when the task demand for the participants just switched from retrieval to  
9 suppression (*but not vice versa*). Applying multivariate time-resolved decoding methods to human fMRI  
10 data, we revealed that immediately after the switch, task conditions were weakly represented by the  
11 inhibitory control and memory retrieval networks, indexed by the lower decoding accuracy, compared to  
12 non-switch trials. Importantly, during the switching, when the neural representation of task demand cannot  
13 be updated in time to match the current condition (i.e., *the mismatch between task demand and neural*  
14 *state*), participants reported more memory intrusions in No-Think trials and less memory retrieval in  
15 Think trials. Together, we provided neural evidence based on the decoding approach to support the  
16 previously proposed cognitive theories of *switch costs*: delayed transition of task-related neural states is  
17 associated with behavioral *switch costs*. That is to say, if the neural state cannot be timely updated after  
18 the switch of task demand, behavioral performance is compromised.

19 In the current study, participants were instructed to perform one of two opposite memory-related tasks (i.e.,  
20 *memory retrieval and memory suppression*), with the task demand staying the same or switching between  
21 consecutive trials. Similar to what was reported in the classical task-switching paradigms, which focused  
22 on reaction time and/or accuracy (Jersild, 1927; Spector and Biederman, 1976), we found *switch costs* in  
23 the memory performance. Interestingly, *switch costs* in our study were specific to memory suppression:  
24 participants reported more memory intrusions when the current No-Think trial followed a Think trial (i.e.,



1 *Think-to-No-Think transition*), suggesting a higher demand for cognitive control over the tendency to  
2 retrieve during switch trials compared to non-switch trials. At the same time, we did not find the effect of  
3 task switching on the No-Think-to-Think transition. Asymmetric *switch costs* were studied as the results  
4 of sequential difficulty effects during task switching, although the results and predictions from previous  
5 studies are mixed. Results from our study can contribute to this field if we hold the assumption that the  
6 No-Think condition is more difficult than the Think condition due to the larger executive control  
7 requirement. One previous task-switching study reported greater *switch costs* when switching from the  
8 easy to the difficult task (Arbuthnott, 2008), which is consistent with the *switch costs* only in the Think-to-  
9 No-Think transition. But some studies proposed a larger *switch cost* for the easy task than for the difficult  
10 task caused by the need for inhibition (Schneider and Anderson, 2010; Mosbacher et al., 2020). Here, we  
11 would like to acknowledge the alternative interpretation of our results: because potential differences in  
12 task difficulties could be a confound in task decoding (Todd et al., 2013), our decoding results could  
13 reflect the non-specific difficulty differences instead of memory-specific effects. Nevertheless, our time-  
14 resolved neural decoding analysis revealed the potential neural sources of these asymmetry *switch costs*  
15 (*see detailed discussion below*), and could be used to study the neural underpinnings of how difficulty  
16 leads to asymmetric *switch costs* more generally beyond memory in future studies.

17 The carry-over effects of the previous task-set activation on the performance of the following task have  
18 been widely studied in the task-switching literature (Monsell, 2003), but not within the context of memory.  
19 Hulbert and colleagues reported a carry-over effect of memory suppression on the subsequent memory  
20 formation (Hulbert et al., 2016): when healthy participants suppressed unwanted memories, they were  
21 more likely to fail to encode information that was presented after a suppression trial. It was proposed that  
22 memory suppression created an amnesic time window, preventing the experience within the window from  
23 being transformed into long-term memory. Evidence from fMRI supported this model by showing the  
24 reduction of hippocampal activity during memory suppression trials, and the positive correlation between



1 individual differences in decreased hippocampal activity and the extent of memory impairment across  
2 participants (Hulbert et al., 2016).

3 Our finding of more memory intrusions during the No-Think trials that followed a Think trial could result  
4 from a similar mechanism: the preceding Think trials creates a time window in which the hippocampus-  
5 centered memory network remains active to support retrieval. However, if the transition of the neural state  
6 is delayed, the following No-Think trials are still located within this window, and therefore more  
7 prefrontal control resources are needed to down-regulate hippocampal activity. We tested this prediction  
8 beyond the hippocampus: large-scale neural activity of the inhibitory control and memory retrieval  
9 networks were analyzed by multivariate decoding methods to track the adaptive neural state transitions.  
10 We first characterized the transitions in neural states of memory retrieval and inhibitory control networks  
11 between Think and No-Think trials. Consistent with previous models of memory suppression (Anderson  
12 and Hanslmayr, 2014), our results showed that when the task demand switched from retrieval to  
13 suppression, memory retrieval-related regions, mainly including the hippocampus and regions of DMN,  
14 decreased their neural activity, while inhibitory control-related regions, such as dACC and LPFC,  
15 increased their activity. We also examined the relationship between individual differences in the  
16 efficiency of neural state transitions and the *suppression-induced forgetting effect* measured in the  
17 subsequent final memory test and found a positive correlation between them. There are two possible  
18 explanations for how neural state transitions are related to the effect of memory suppression: either larger  
19 or smaller state transitions are associated with the stronger suppression effect. The more intuitive  
20 explanation is that larger transitions are beneficial for suppression; however, our data suggested the  
21 opposite: participants who demonstrated less neural reconfiguration showed a stronger memory  
22 suppression effect in the following final memory test. This finding is nevertheless consistent with a  
23 previous study, which demonstrated that higher intelligence is associated with less task-related neural  
24 reconfiguration (Schultz and Cole, 2016). Our data, together with this study, may suggest that less neural  
25 reconfigurations could reflect optimization for efficient (i.e., less) state updates, reducing processing

1 demands (Schultz and Cole, 2016). This optimal task-related neural reconfiguration could then be  
2 beneficial for memory suppression.

3 Recent human fMRI studies revealed task representations using multivariate decoding methods. Brain  
4 regions such as the parietal cortex, medial, and lateral PFC encode the current task demands (Bode and  
5 Haynes, 2009; Cole et al., 2011; Gilbert, 2011; Woolgar et al., 2011; Momennejad and Haynes, 2013;  
6 Waskom et al., 2014; Wisniewski et al., 2015; Etzel et al., 2016) and our study provided further support  
7 for this idea by showing that neural activity patterns of these regions largely contributed to successful  
8 discrimination between two kinds of visually highly similar trials with opposite task demands (i.e.,  
9 *memory retrieval and suppression*). These identified regions have been previously associated with  
10 cognitive processing such as retrieval, maintenance, the process of rules or demands during task switching  
11 (Bunge et al., 2003; Sakai and Passingham, 2003; Gilbert, 2011; Woolgar et al., 2011; Reverberi et al.,  
12 2012). Beyond that, memory-related areas such as the hippocampus and regions within the DMN also  
13 contributed to the successful decoding in our study because the retrieval-demand and its associated neural  
14 activity significantly differed between Think and No-Think trials. However, whether these task  
15 representations can be modulated by external experimental manipulations and detected by fMRI signals is  
16 an ongoing debate. Task representations are modulated by factors including rule complexity (Woolgar et  
17 al., 2015), rewards (Etzel et al., 2016), difficulty (Wisniewski et al., 2015), and skill acquisition (Jimura et  
18 al., 2014), but not by variables such as task novelty (Cole et al., 2011), or intention (Zhang et al., 2013;  
19 Wisniewski et al., 2016).

20 Two studies directly investigated whether and how cognitive control processes during task switching  
21 modulate the neural representation of the current task demand. Waskom and colleagues found that task  
22 representations are enhanced after switches, indexed by the higher decoding accuracy (Waskom et al.,  
23 2014). However, they did not find evidence for behavioral switch costs in their sample; thus, the  
24 behavioral relevance of the reported stronger task representation (i.e., *higher decoding accuracy*) is  
25 unclear. Loose and colleagues did find the behavioral switch costs, but no modulation effect in the task

1 representations (i.e., *comparable decoding accuracy between the switch and non-switch trials*) (Loose et  
2 al., 2017) and, therefore, Loose and colleagues proposed the switch-independent neural representations of  
3 the current task demand. Compared to the two studies mentioned above, our study found asymmetrical  
4 behavioral *switch costs* (i.e., *only for Think-to-No-Think transition, but not for No-Think-to-Think*  
5 *transition*). To investigate the potential neural source of these asymmetric *switch costs*, we further  
6 analyzed decoding accuracies as a function of time separately for memory retrieval and suppression. For  
7 both tasks, decoding accuracy was lower immediately after task switching. However, we found the post-  
8 switch adaptive representation of the current demand for memory retrieval. Specifically, although the  
9 representation of the current demand (i.e., *retrieval*) was weaker compared to the previous demand (i.e.,  
10 *suppression*) immediately after switching, representations of retrieval demand were quickly increased and  
11 then they became even stronger than the previous demand half-way during trials. Interestingly, we also  
12 found preliminary correlational evidence that participants who showed stronger post-switch adaptive  
13 representation, performed better at the memory retrieval task. Therefore, we propose that this retrieval-  
14 specific adaptation may explain why there were no obvious *switch costs* during memory retrieval. Also,  
15 this interpretation would be consistent with the combination of stronger task representation and no  
16 behavioral *switch costs* reported by Waskom and colleagues (Waskom et al., 2014). Such demand-specific  
17 neural dynamics of adaptive task representation have never been reported before, potentially because our  
18 time-resolved decoding approach has not been used in the previous task-switching studies. Future studies  
19 with such a combination of time-resolved decoding approach and electroencephalogram (EEG) or  
20 magnetoencephalogram (MEG) may reveal even more details of this adaptive task representation during  
21 task switching. Critically, our neural state decoding analysis revealed the relationship between current task  
22 representation and behavioral performance on a trial-by-trial basis. Specifically, we showed that in switch  
23 trials, if the underlying neural state matched the external task demand, behavioral performance remained  
24 intact, while if the neural state was incorrectly represented, task performance was compromised. This  
25 pattern of results may further explain why higher decoding accuracy was reported together with limited  
26 behavioral switch costs in Waskom's study (Waskom et al., 2014). As the adaptive coding hypothesis

1 suggests (Duncan, 2001, 2010; Waskom et al., 2014), our findings demonstrated the dynamic adjustment  
2 of task representations can be tracked by large-scale neural activity from task-relevant brain networks on a  
3 trial-by-trial basis and provided direct evidence to associate delayed neural transitions with behavioral  
4 *switch costs*.

5 Our study has implications for a better understanding of both task switching and memory suppression.  
6 First, task switching is one of the central elements of executive control. Here, we studied task switching in  
7 the context of memory (i.e., *switch between memory retrieval and suppression*). We found that switch-  
8 induced delays in transitions of neural states can explain compromised memory performance after task  
9 switching. This principle could be tested and used to explain switch costs in other contexts: Using neural  
10 activity-based decoding approaches, we can track whether the neural state (*of the previous task*) lingers on,  
11 and probe its influences on the performance (*of the current task*). Second, memory suppression is an  
12 experimental paradigm to mimic attempts to intrusive traumatic memories. Understanding how we can  
13 better suppress intrusive traumatic memories might pave the way for new interventions and treatments for  
14 posttraumatic stress disorder (PTSD) and other affective disorders (Mary et al., 2020). However, memory  
15 suppression is usually challenging in daily life. Our results suggest that task switching and inherent switch  
16 cost may explain this challenge. Usually, there are far more moments when we try to retrieve the  
17 information instead of suppressing memories and it means that we need to switch more often from a more  
18 habitual retrieval state to a less often implemented suppression state. According to our empirical results, to  
19 minimize the negative effects of switch costs and maximize suppression-induced forgetting, potential  
20 suppression-based interventions may benefit from “long blocks” of suppression trials to prevent the carry-  
21 over effect of switching from retrieval to suppression.

22 *Limitation and future directions*. We used distinct locations on maps as memory cues to pair with pictures  
23 as to-be-remembered associations (i.e., *picture-picture pairs*) instead of word-word or word-picture pairs  
24 which were more frequently used in previous TNT studies (Anderson and Green, 2001; Anderson, 2004;  
25 Levy and Anderson, 2012). Our material (1) could potentially induce eye-movements as noise and (2) lead

1 to accidental memory retrieval/suppression based on un-cued locations during visual search for memory  
2 cues. These explanations can be only investigated in future studies in which eye-tracking and neural  
3 responses are collected simultaneously. Furthermore, the fast sequential reactivation of memory traces  
4 during eye movement can be potentially detected based on EEG/MEG signals, whose temporal resolution  
5 is much higher than fMRI. However, despite these potential limitations, we have reason to think that the  
6 utilization of picture-picture pairs was not problematic because we replicated traditional TNT effects on  
7 both the behavioral and neural levels (Anderson and Green, 2001; Anderson, 2004; Levy and Anderson,  
8 2012). We propose that using locations on maps as memory cues is important for neural state decoding  
9 analyses presented in this study, and decoding for episodic memory trace presented in another publication  
10 of our laboratory (Liu et al., 2020a) because visual and semantic processing can in this way be better  
11 controlled and more consistently compared to distinct picture/word cues. Furthermore, using maps as  
12 memory cues in the TNT paradigm opens exciting opportunities to probe how the organization principles  
13 of spatial memory (e.g., *cognitive map*, *cognitive graph*, and *grid-like representation* (Behrens et al., 2018;  
14 Bellmund et al., 2018; Peer et al., 2020)) affect the effects of retrieval practice (i.e., *Think*) and  
15 suppression (i.e., *No-Think*) on memory traces which are located at the same map. In this study, we  
16 intentionally prevented the co-localizing of the same manipulation on certain parts of the map. In future  
17 studies, the same manipulation (e.g. *No-Think*) can be assigned to specific locations on a particular map to  
18 see how memory suppression affects changes as a function of Euclidean distance and whether it can be  
19 generalized by a grid-like network. Lastly, because of the different levels of specificity in the task  
20 condition instructions (i.e., *Think instruction to recall specific memory while No-Think instruction to*  
21 *suppress all related memories and thoughts*), the Think vs. No-Think contrast is not optimal and related  
22 overall BOLD activity levels and behaviors are difficult to compare. For the neuroimaging analysis, to  
23 replicate previous memory suppression findings, we have no choice but to contrast Think trials and No-  
24 Think trials. For the behavioral data, we intentionally analyze retrieval and intrusion rating separately  
25 instead of performing the interaction analysis like the conventional task-switching studies.

1 In summary, our results provide neural insights into the flexible task switching between memory retrieval  
2 and memory suppression. We found evidence for *switch costs* in memory suppression: it is more difficult  
3 to suppress unwanted memories immediately after memory retrieval. During switching between retrieval  
4 and suppression, we observed delayed transitions of neural states that each of them separately represents  
5 current task demand. Delayed neural transitions were associated with *switch costs* (i.e., *unsuccessful*  
6 *suppression and retrieval*), which directly support previously proposed cognitive theories that *switch costs*  
7 could be the result of the carry-over of previous task-set activation. These results provide insight into the  
8 critical role of dynamically adjusted neural reconfigurations in supporting flexible memory suppression  
9 and the broader neural mechanisms by which humans can flexibly adjust their behavior in ever-changing  
10 environments.

11

12

13

14

15

16

17

18

19

20

21

22

## 1 **Materials and Methods**

### 2 **Participants**

3 In total, thirty-two right-handed, healthy young participants recruited from the Radboud Research  
4 Participation System finished all of the experimental procedures. All of them are native Dutch speakers.  
5 Six participants were excluded from data analyses due to low memory performance (i.e., lower the chance  
6 level (25%) during the final memory test) (n=2), or excessive head motion (n=4). We used the motion  
7 outlier detection program within the FSL (i.e., FSLMotionOutliers) to detect timepoints with large motion  
8 (threshold=0.9). There are at least 20 spikes detected in these excluded participants with the largest  
9 displacement ranging from 2.6 to 4.3, while participants included had less than ten spikes. Finally, 26  
10 participants (15 females, age=19-30, mean=23.51, SD=3.30) were included in the behavioral and  
11 neuroimaging analysis reported in this study. Due to the reconstruction error during the data acquisition,  
12 one run of one participant is not complete (20-30 images were missing). Therefore, that run was not  
13 included in our analysis of time series. But unaffected acquired images of that run were used in our  
14 univariate activation analysis. No participants reported any neurological and psychiatric disorders. We  
15 further used the Dutch-version of the Beck Depression Inventory (BDI) (Roelofs et al., 2013) and State-  
16 Trait Anxiety Inventory (STAI) (van der Bij et al., 2003) to measure the participants' depression and  
17 anxiety level during scanning days. No participant showed a sign of emotional problems (i.e., their BDI  
18 and STAI scores are within the normal range). The experiment was approved by and conducted in  
19 accordance with requirements of the local ethics committee (Commissie Mensgebonden Onderzoek region  
20 Arnhem-Nijmegen, The Netherlands) and the declaration of Helsinki, including the requirement of written  
21 informed consent from each participant before the beginning of the experiment. Each participant got 10  
22 euros/hour for their participating.

23

24

## 1 **Experiment design**

2 This experiment is a two-day fMRI study, with 24 hours delay between two sessions (**Figure S8**). fMRI  
3 data of the day2 final memory test has been published in another publication (Liu et al., 2020a), and the  
4 comprehensive reports of the experimental materials and design can be found there. Because all of the  
5 behavioral and neuroimaging data included in this study came from the Day2 session, we just presented a  
6 brief description of the Day1 session. On day1, we instructed participants to memorize a series of  
7 sequentially presented location-picture associations, for which 48 distinct photographs were presented  
8 together with 48 specific locations on two cartoon maps. In our experiment, we used picture (i.e.  
9 *location*)-picture pairs as to-be-remembered materials instead of word-word or word-picture pairs to keep  
10 visual processes during scanned tasks largely consistent. More specifically, whole maps were presented  
11 with sequentially highlighting specific locations by colored frames as memory cues, therefore, at the  
12 perceptual level, participants were always processing the same two maps. All photographs can be assigned  
13 into one of the four categories, including animal, human, scene (e.g., train station), and object (e.g., pen  
14 and notebooks). Therefore, objective memory performance could be assessed within the scanner by  
15 instructing participants to indicate the picture's category when cued by the map location. During this study  
16 phase, each location-picture association was presented twice, and the learning was confirmed by two  
17 typing tests outside the scanner. During the typing tests, participants were required to describe the  
18 photograph associated with the memory cue in one or two sentences. Immediately after the study phase  
19 (Day1), 88.01% of the associated pictures were described correctly (SD= 10.87%; range from 52% to  
20 100%).

21 On Day2, participants first performed the second typing test, and still recalled 82.15% of all associations  
22 (SD = 13.87%; range from 50% to 100%). Then, they performed the Think/No-Think (TNT) task, and  
23 final memory test insider the scanner. We used the TNT task with trial-by-trial performance rating to  
24 monitor the retrieval or suppression of each trial. Compared to the original TNT task (Anderson, 2004),  
25 the additional self-report did not affect the underlying memory suppression process and also was used in a



1 neuroimaging experiment before (Levy and Anderson, 2012). Forty-eight picture-location associations  
2 were divided into three conditions (i.e., “think or retrieval,” “no-think or suppression,” and “baseline or  
3 control” condition) in a counterbalanced way, therefore, for each association, the possibility of belonging  
4 to one of the three conditions is equal. For each map, 24 locations that were distributed evenly across the  
5 map were paired with six pictures from each category. One-third of associations (8 associations; 2 pictures  
6 from each category) on that map were retrieval associations (i.e. “*Think*” associations), one-third of  
7 associations were suppression associations (i.e., “*No-Think*” associations), and the remaining one-third  
8 were control associations. The spatial distribution of the three conditions was determined manually by the  
9 experimenter to prevent clusters of specific conditions on certain parts of the maps. During the retrieval  
10 condition, locations were highlighted with the GREEN frame for 3s, and participants were instructed to  
11 recall the associated picture quickly and actively and to keep it in mind until the map disappeared from the  
12 screen. By contrast, during the suppression condition, locations were highlighted with the RED frame for  
13 3s, and our instruction for participants was to prevent the potential memory retrieval and try to keep an  
14 empty mind. We gave additional instructions for the suppression condition: “*when you see a location,*  
15 *highlighted with a RED frame, you should NOT think about the associated picture. Instead, you should try*  
16 *to keep an empty mind during this stage. It is a difficult task, and it is totally fine that sometimes you still*  
17 *think about the associated picture. But please do NOT close your eyes, focus on something outside the*  
18 *screen, or think about something else in your life. These strategies, although useful, could negatively*  
19 *affect the brain activity that we are interested in .....” . After each trial, participants had a maximum 3s to  
20 press the button on the response box to indicate whether and how often the associated picture entered their  
21 mind during Think or No-Think trials. Specifically, they rated their experience from 1-4 representing from  
22 No Recall (i.e., Never) to Always Recall. Responses during Think trials were used as retrieval frequency  
23 ratings, while responses during No-Think trials were regarded as intrusion frequency ratings. Associations  
24 that belong to the control condition (16 associations) were not presented during this phase. The TNT task  
25 included five functional runs, with 32 retrieval trials and 32 suppression trials per run. All “retrieval” or  
26 “suppression” associations were presented twice within one run, but not next to each other. Therefore,*

1 they were presented ten times during the entire TNT task. Between each trial, fixation was presented for 1-  
2 4s (mean=2s, exponential model) as the inter-trial intervals (ITI).

3 To investigate the task switching within the TNT task, for each run of each participant, we predefined the  
4 sequence of task demand to form “blocks” of memory retrieval or suppression with the length range from  
5 1 trial to 4 trials (mean=1.9 trials, std=1.01 trials,  $P_{\text{one-trial block}}=46.875\%$ ,  $P_{\text{two-trials block}}=25\%$ ,  $P_{\text{three-trials}}$   
6  $\text{block}=18.75\%$ ,  $P_{\text{four-trials block}}=9.375\%$ ). In this sequence, the task demand of the current trial can be the same  
7 as the previous trial (“non-switch” trial) or differ from the previous trial (“switch” trial). Within one run of  
8 a total of 64 trials, 31 trials were “non-switch” trials, 32 trials were “switch” trials, and the first trial  
9 cannot be labeled as “non-switch” trials or “switch” trials because it has no predecessor. The “non-switch”  
10 trials and “switch” trials both accounted for around 50% of the “retrieval” and “suppression” trials. After  
11 determining the sequence of task demand, specific location-picture associations from retrieval or  
12 suppression condition were randomly selected for each trial.

13 After the TNT task, a final memory test was performed by participants within the scanner to evaluate the  
14 effect of different modulations on memory. All 48 memory cues (i.e., locations), including retrieval,  
15 suppression and control conditions, were presented again with the duration of 4s by highlighting a certain  
16 part of the map with a BLUE frame. Participants were instructed to recall the associated picture as vividly  
17 as possible during the presentation and then give the responses on two multiple-choice questions within 7s  
18 (3.5s for each question). The first one is the measure of subjective memory: “how confident are you about  
19 the retrieval?”. Participants had to rate from 1 to 4 representing “Cannot recall, low confident, middle  
20 confident and high confident” separately. The second one is the measure of objective memory: “Please  
21 indicate the category of the picture you were recalling.” They needed to choose from four categories (i.e.,  
22 Animal, Human, Scene, and Object). It is notable that we only analyzed the behavioral data from this  
23 within-scanner memory test; the neural activity during this test is not the focus of this study.

24

## 1 **Behavioral data analysis**

2 Behavioral results of this project were comprehensively reported in another study of our lab with the focus  
3 on the final memory test (Liu et al., 2020a). No results of tasks sneurvawitching (i.e., *switch costs*) were  
4 reported in that study, and task switching is the central scientific question of this study. First, we analyzed  
5 the behavioral performance during the TNT task. Trial-by-trial performance reports from each participant  
6 were used to calculate the percentage of successful recall chosen across 160 retrieval trials and successful  
7 suppression across 160 suppression trials. Following previous studies (Levy and Anderson, 2012; Liu et  
8 al., 2020a), performance reports from suppression trials were used to quantify individual differences in  
9 memory suppression efficiency (“*intrusion slope score*”). To account for the individual differences in  
10 memory performance before the TNT, we restricted the analysis of suppression into the associations for  
11 which participants can still remember during the second typing test (“remembered associations”). We used  
12 linear regression to model the relationship between intrusion frequency ratings of “remembered  
13 associations” and the number of repetitions of suppression at the individual level. Participants with more  
14 negative slope scores are better at downregulating memory intrusions than those with less negative slope  
15 scores. Furthermore, we labeled each trial as the “non-switch” trial or “switch” trial based on whether the  
16 task demand of the current trial is the same as the previous trial. Trial-by-trial performance between  
17 “switch” and “non-switch” trials during retrieval or suppression was compared using paired t-tests.

18 We also quantified the individual differences in *suppression-induced forgetting effect* based on two types  
19 of participants’ performance (i.e., recall accuracy and confidence rating) during the final memory test.  
20 Memory performance for associaitons that belong to the control condition was regarded as the baseline to  
21 qualify the suppression-induced forgetting effect. For each participant, recall accuracy (objective memory  
22 measure) and confidence rating (subjective memory measure) were calculated for No-Think associations  
23 and control associations separately. Then objective and subjective *suppression scores* were computed  
24 separately by subtracting the accuracy and confidence of No-Think associations from the control  
25 associations. The more negative a *suppression score* is, the stronger the *suppression-induced forgetting*

1 *effect* is. The memory suppression score was used to correlate with the “*intrusion slope score*” and  
2 transition of neural states during the TNT.

### 3 **MRI data acquisition and preprocessing**

4 We used a 3.0 T Siemens PrismaFit scanner (Siemens Medical, Erlangen, Germany) and a 32 channel  
5 head coil system at the Donders Institute, Centre for Cognitive Neuroimaging in Nijmegen, the  
6 Netherlands to acquire MRI data. For each participant, MRI data were acquired on two MRI sessions  
7 (around 1 hour for each session) with 24 hours’ interval. In this study, we only used the data from the  
8 day2 session. Specifically, we acquired a 3D magnetization-prepared rapid gradient echo (MPRAGE)  
9 anatomical T1-weighted scan for the registration purpose with the following parameters: 1 mm isotropic,  
10 TE = 3.03 ms, TR = 2300 ms, flip angle = 8 deg, FOV = 256 × 256 × 256 mm. All functional runs were  
11 acquired with Echo-planar imaging (EPI)-based multi-band sequence (acceleration factor=4) with the  
12 following parameters: 68 slices (multi-slice mode, interleaved), voxel size 2 mm isotropic, TR = 1500 ms,  
13 TE = 39 ms, flip angle =75 deg, FOV = 210 × 210 × 210 mm. In addition, to correct for distortions,  
14 magnitude and phase images were also collected (voxel size of 2 × 2 × 2 mm, TR = 1,020 ms, TE = 12 ms,  
15 flip angle = 90 deg).

16 We used the FEAT (fMRI Expert Analysis Tool) Version 6.00, part of FSL (FMRIB's Software Library,  
17 [www.fmrib.ox.ac.uk/fsl](http://www.fmrib.ox.ac.uk/fsl)) (Jenkinson et al., 2012) together with Automatic Removal of Motion Artifacts  
18 (ICA-AROMA) (Pruim et al., 2015) to perform our preprocessing. This pipeline was based on procedures  
19 suggested by Mumford and colleagues (<http://mumfordbrainstats.tumblr.com>) and the article that  
20 introduced the ICA-AROMA (Pruim et al., 2015). Specifically, we first removed the first four volumes of  
21 each run from the 4D sequences for the stabilization of the scanner and then applied the following pre-  
22 statistics processing: (1) motion correction using MCFLIRT (Jenkinson et al., 2002); (2) field  
23 inhomogeneities were corrected using B0 Unwarping in FEAT; (3) non-brain removal using BET (Smith,  
24 2002); (4) grand-mean intensity normalization of the entire 4D dataset by a single multiplicative factor; (5)  
25 spatial smoothing (6mm kernel). ICA-AROMA was used to further remove motion-related spurious noise.

1 We chose to conduct “non-aggressive denoising” and applied highpass temporal filtering (Gaussian-  
2 weighted least-squares straight-line fitting with  $\sigma=50.0s$ ) before the following analyses.  
3 All of the mentioned preprocessing steps were performed in native space. We used the following steps to  
4 perform the registration between native space, participant’s high-resolution T1 space, and standard space.  
5 Firstly, we used the Boundary Based Registration (BBR) (Greve and Fischl, 2009) to register functional  
6 data to the participant’s high-resolution structural image. Next, registration of high resolution structural to  
7 standard space was carried out using FLIRT (Jenkinson and Smith, 2001; Jenkinson et al., 2002) and was  
8 then further refined using FNIRT nonlinear registration (Andersson et al., 2007). Resulting parameters  
9 were used to align processed functional images from native-space to standard space for the following  
10 signal extraction.

#### 11 **Univariate General Linear Model (GLM) analyses**

12 We ran the voxel-wise GLM analyses of the TNT task to identify brain regions that are more active during  
13 memory suppression compared to memory retrieval (i.e., No-Think VS Think). All time-series statistical  
14 analysis was carried out using FILM with local autocorrelation correction (Woolrich et al., 2001) using  
15 FEAT. In total, three regressors were included in the model. We modeled the presentation of memory cues  
16 (locations) as two kinds of regressors ( $\text{duration}=2TR$ )(i.e., suppression trials and retrieval trials). For each  
17 participant, based on the second typing test which was immediately before the TNT phase, we separately  
18 modeled the location-picture associations, which participants cannot describe (i.e., *unlearned associations*)  
19 as a separate regressor. Because these location-picture associations were unlearned/forgotten, there were  
20 no memories to be recalled or suppressed during the TNT phase. We conducted the two contrasts-of-  
21 interest (i.e., No-Think VS Think and Think VS No-Think) first at the native space and then aligned  
22 resulting statistical maps to MNI space using the parameters from the registration. These aligned maps  
23 were first used for participant-level averaging across five TNT runs, and then the group-level analyses.  
24 The group-level statistical map was corrected for multiple comparisons using default cluster-level  
25 correction within FEAT (voxelwise  $Z>3.1$ , cluster-level  $p < .05$  FWER corrected).

1

## 2 **Networks-of-interest identification**

3 To identify our networks-of-interest (i.e., inhibitory control network and memory retrieval network), we  
4 performed several term-based meta-analyses using the *Neurosynth* (<https://neurosynth.org/>) (Yarkoni et al.,  
5 2011). “Inhibitory control” and “memory retrieval” were used as terms separately to search for all studies  
6 in the *Neurosynth* database whose abstracts include the input term at least once. Then, all identified  
7 studies were combined separately for each term to generate the corresponding statistical map. We used  
8 uniformity test maps in our study. This method tested whether the proportion of studies that report  
9 activation at a given voxel differs from the rate that would be expected if activations were uniformly  
10 distributed throughout the grey matter. Voxel-wise Z-score from the one-way ANOVA testing was saved  
11 in a statistical map. Each map was thresholded to correct for multiple comparisons using a false discovery  
12 rate (FDR)( $p < 0.01$ ). It is notable that due to the continuous update of the *Neurosynth* database, the number  
13 of studies included in the analyses could be slightly different for each search, the maps we used can be  
14 found in our *Neurovault* repository (<https://identifiers.org/neurovault.collection:7731>). Similar network  
15 identification was also performed using *BrainMap* (Laird et al., 2005) as a confirmation. The two methods  
16 of meta-analysis yielded highly similar maps of network-of-interests (**Figure S9**), and we used the maps  
17 generated by the *Neurosynth* in our main text.

18 We used the thresholded ( $p_{\text{FDR}} < 0.01$ ) spatial maps of “inhibitory control” and “memory retrieval” to  
19 general three masks of networks-of-interest. The areas which belong to both the “inhibitory control” and  
20 “memory retrieval” masks were labeled as *overlap network*, the areas which only belong to the “inhibitory  
21 control” mask were labeled as *inhibitory control network*, and the areas which only belong to the  
22 “memory retrieval” masks were labeled as *memory retrieval network*.

## 23 **Brain parcels for the extraction of time series**

1 We combined a parcellation of cerebral regions (N=300; mean size=440.1 voxels (SD=188.9 voxels))  
2 (Schaefer et al., 2018) and all subcortical regions (N=14; mean size=491.57 voxels (SD=334.7 voxels))  
3 from the probabilistic Harvard-Oxford Subcortical Structural Atlas (Desikan et al., 2006) as a whole-brain  
4 parcellation. The parcellation of cerebral regions was based on a gradient-weighted Markov Random Field  
5 (gwMRF) model, which integrated local gradient and global similarity approaches (Schaefer et al., 2018).  
6 Based on both task fMRI and resting-state fMRI acquired from 1489 participants, parcels with functional  
7 and connective homogeneity within the cerebral cortex were generated. Each parcel is one of the seven  
8 large-scale functional brain networks, including *Visual*, *Somatomotor*, *Dorsal Attention*, *Ventral Attention*,  
9 *Limbic*, *Frontoparietal*, *Default network* (Yeo et al., 2011). Subcortical regions included bilateral  
10 thalamus, caudate, putamen, globus pallidus, hippocampus, amygdala, and ventral striatum. Details of  
11 each parcel (e.g., name, coordinates, hemisphere) within the whole brain parcellation can be found in our  
12 OSF folder (<https://osf.io/cq96h/>). Some may argue that the size of parcels differs across brain regions,  
13 which could lead to different levels of signal-to-noise ratio for extracted time series after averaging across  
14 all voxels within these parcels. We agreed with this possibility, but hold the idea that it is more important  
15 to extract signals from biological-valid and meaningful parcels instead of parcels with externally forced  
16 equal size. The latter may cause the issue that averaged neural signals are the combinations of two or more  
17 rather separate signals which associate with different (cognitive) functions.

18 For each of the 314 parcels of the whole-brain parcellation, we compared it with the mask of *overlap*  
19 *network*, *inhibitory control network*, and *memory retrieval network* and identified the mask in which the  
20 parcel shared the highest percentage of common voxels. The parcel was assigned to that category if the  
21 highest percentage is higher than 10%. If the highest percentage of common voxels is lower than 10%, the  
22 parcel was not assigned to any category. After this procedure, 110 out of the 314 parcels were assigned to  
23 one of the categories. Specifically, 71 parcels were considered as *memory-related regions*, 29 parcels were  
24 categorized as *control-related regions*, and 10 parcels were labeled as *overlap regions* in our following  
25 analysis.

## 1 **Extraction of time series from parcels**

2 We additionally removed nuisance time series (cerebrospinal fluid (CSF) signals, white matter signals,  
3 motion, and event-related activity) using a method based on a projection on the orthogonal of the signal  
4 space (Friston et al., 1994; Lindquist et al., 2019). We generated confounding time series (CSF, white  
5 matter, the six rigid-body motion parameters (three translations and three rotations), and framewise  
6 displacement (FD)) for each run of each participant. Event-related activity time series were estimated by a  
7 finite impulse response (FIR) function. A recent study has shown that the removal of event-related activity  
8 based on FIR modeling is an important step for the preprocessing of time series during a task (Cole et al.,  
9 2019). The signal from each parcel was extracted and z-scored, and all nuisance time series were removed  
10 simultaneously using the *nilearn.signal.clean* function. All cleaned time series were shifted 3 TRs (4.5 s)  
11 to account for the HRF delay and then aligned with the task demand (i.e., retrieval or suppression) at that  
12 moment. We shifted the time series by 4.5s because we reasoned that the peak of the HRF is between 4-6  
13 s from the triggering event. This TR-wise data shifting is a pretty standard practice in time-resolved  
14 decoding of fMRI data ([https://brainhack-princeton.github.io/handbook/content\\_pages/05-02-mvpa.html#](https://brainhack-princeton.github.io/handbook/content_pages/05-02-mvpa.html#))

## 15 **The transition of neural states analysis**

16 First, we characterized the transition of neural states at the group level. Extracted time series from each  
17 run of each participant were split according to the task instruction (i.e., memory retrieval or memory  
18 suppression) and concatenated. Second, two kinds of time series were further concatenated across five  
19 TNT runs within that participant (*except for one participant, only four complete TNT runs were included*).  
20 Third, time series were concatenated across all participants. Fourth, two time-series were averaged across  
21 all time points to represent the mean activity intensity for that parcel during retrieval or suppression.  
22 To estimate the relative dominance of each parcel during two neural states (i.e., Think and No-Think), we  
23 ranked the mean activity intensity of each parcel (the highest activity was ranked first). We then calculated  
24 the changes in ranks when the task switched from Think to No-Think by subtracting the rank during Think



1 from the rank during No-Think. The same analyses were conducted with raw signal intensity and Z-values.  
2 Results can be found in the **Figure S4**. The negative change suggested an increase in relative dominance,  
3 while the positive change represented the opposite. We calculated two neural indexes (“state transition  
4 index” and “state transition index Version 2 (V2)”) to quantify the transition of neural states at the  
5 individual level and associate this individual difference with the subsequent suppression-induced  
6 forgetting effect. The state transition index was calculated by adding up the averaged relative decreases  
7 (absolute values for negative values) in rank values of *memory-related regions*, and the averaged relative  
8 increase in rank values of all *control-related regions*. The calculation and results of “state transition index  
9 Version 2 (V2)” can be found in the *Supplemental Material- An alternative method to quantify individual*  
10 *differences in neural state transitions*. It is notable that although transition index and transition index V2  
11 were calculated using different methods, they were based on the same set of data. Therefore, the data  
12 analyses of index V2 should not be regarded as independent analysis. To explore whether the neural state  
13 transition during the TNT relates to the suppression-induced forgetting effect, we correlated two state  
14 transition indices with the *objective suppression score* and *subjective suppression score*. Suppression  
15 scores were calculated based on memory performance during the final memory test after TNT.

## 16 **Neural states decoding analysis**

17 Before the decoding analysis, we generated the labels of task demand for each time point within the trial  
18 based on its instruction (i.e., Think or No-Think). For example, if the trial is a Think trial, time points  
19 started from the presentation of memory cues of this trial to the presentation of memory cues of the next  
20 trial were labeled as “Think.” We performed the time-resolved multivariate decoding analysis based on  
21 the brain activity of all 110 regions and corresponding labels of task demand during each time point. This  
22 decoding analysis allowed us to generate the predicted label of task demand for each time point, thus  
23 revealing the fast dynamics of the neural state transition induced by the switch of task demand.  
24 Specifically, decoding analysis via the linear Support Vector Classification (SVC), the C-Support Vector  
25 Machine within the scikit-learn package (<https://scikit-learn.org/stable/>). We used default parameters of

1 the function (regularization (C)=1, radial basis function kernel with degree=3). The classification of neural  
2 states was performed separately for each time point using a leave-one-run-out cross-validation approach  
3 within each participant. This procedure resulted in a decoded task demand for each time point of each  
4 participant. These predictions were evaluated by comparing these decoded task demands with actual task  
5 demand. To separate all types of correct and incorrect classification for the following analyses, we  
6 generated the confusion matrix for each participant. This confusion matrix contained the percentage of all  
7 four situations based on the task demand and if the prediction matches the task instruction (i.e., Think-  
8 Correct classification, Think- Incorrect classification, No-Think- Correct classification, and No-Think-  
9 Incorrect classification). We extracted all SVC discriminating weights assigned to the features during the  
10 participant-specific decoding and averaged them across all participants to generate the neural state-  
11 predictive pattern. The brain parcels with higher absolute values contributed more to decoding models.

12 To test for possible differences in neural representations of task demand induced by the task-switching, we  
13 performed the described decoding analyses for switch time points and non-switch time points separately.  
14 The switch time points were defined as the presentation time (2TRs; 3s) of the first memory cue after the  
15 switch of task demand. The two decoding analyses yielded decoding accuracies for switch time points and  
16 for non-switch time points for each participant. We compared these two types of decoding accuracies  
17 using the paired t-test. Less accurate decoding was described as the evidence for the weaker representation  
18 of the current task demand in the literature (Waskom et al., 2014; Loose et al., 2017). Also, because we  
19 only have two task demands, less accurate decoding reflects the unsuccessful transition from the previous  
20 demand to the current demand according to the instruction. After the general comparison between  
21 decoding accuracies between the *switch* and *non-switch* condition, we further analyzed them as the  
22 function of time (i.e., TR), and separately for Think and No-Think. This approach allowed us to explore  
23 the demand-specific neural dynamics of task demand representation within the different phases of one trial.

24 Next, we aimed to investigate the behavioral relevance of the mismatch moments (i.e., *incorrect*  
25 *classification*) between task demand and the underlying neural state. Because we were mainly interested in

1 the switch-induced mismatch, we first restricted our analyses to these switch time points and then  
2 extended them to the non-switch time points as an exploratory analysis. For each participant, we averaged  
3 the trial-by-trial behavioral performance during the TNT task based on whether the actual task demand  
4 matches with decoded task demands. This yielded retrieval performance and suppression performance for  
5 *match* and *mismatch* conditions. Paired t-tests were performed to examine the effect of mismatch on the  
6 performance of memory retrieval and memory suppression separately. The performance calculations and  
7 comparisons described above were repeated for non-switch time points as well.

### 8 **Alternative classifier training procedures and effects on our results**

9 During our main neural state decoding analysis, fMRI time points regardless of their specific phase (e.g.,  
10 memory cue, response, or fixation...) and corresponding performance were all labeled as one of the two  
11 states (i.e., Think or No-Think) and used for classifier training and testing. We investigated the effects of  
12 applying two alternative classifier training procedures on our reported results. We described the  
13 procedures for alternative classifier training A and B below: (A) only time points during the memory cue  
14 phase were used for classifier training and testing; during classifier training, only the data from trials that  
15 participants reported successful retrieval and suppression were used for classifier training to further  
16 increase the specificity of the classifier. Successful retrieval trials were defined as trials with “often” or  
17 “always” retrieval reports and successful suppression trials were defined as trials with “never” or  
18 “sometimes” intrusion reports. (B) A subsampling balancing step was used to make sure that, for each  
19 participant, an equal number of data points from the “Think” and “No-Think” state was used for the  
20 classifier training; to prevent classifiers to use any sequential information during training, fMRI data  
21 (together with their state labels) were re-ordered to not reflect its original temporal sequence. For both  
22 procedures (A) and (B), after training, classifiers were used to generate the neural states (i.e., predicted  
23 state labels) only for time points during the memory cue phase. These labels were then analyzed to  
24 replicate three key findings of our decoding analysis: (1) higher-than-chance level neural state decoding  
25 accuracies; (2) less accurate decoding after switching compared to non-switch trials; (3) when predicted

1 state labels (i.e., neural state) cannot match with the actual task demand, trial-by-trial behavioral  
2 performance was compromised.

### 3 **Relationship between head motion, neural state transitions, and behaviors**

4 To explicitly assess how head motion could potentially affect our results, we derived a time point-by-  
5 timepoint measure of head motion, framewise displacement (FD) (Power et al., 2012), during the TNT  
6 task. FD is defined as the sum (in mm) of rotational and translational displacements from the current  
7 volume to the next volume. We aligned the time-series of FD with task structure and behaviors in a way  
8 similar to the analyses of the time series of fMRI signals but did not consider the HRF. The following  
9 contrasts were performed to compare head motion between conditions: (1) difference in FD between  
10 Think trials and No-Think trials; (2) difference in FD between correct neural state decoding and incorrect  
11 neural state decoding; (3) difference in FD between the switch and non-switch condition. Correlations  
12 analyses were performed between individual differences in head motion between Think and No-Think  
13 trials (i.e.,  $FD_{\text{Think}} - FD_{\text{No-Think}}$ ), *state transition index*, *objective/subjective suppression score*.

### 14 **Data and code availability**

15 All research data of this study were uploaded to the Donders Repository (<https://data.donders.ru.nl/>) and  
16 are publicly available. The project was named *Tracking the in- voluntary retrieval of unwanted memory in*  
17 *the human brain with functional MRI* in the Repository (<https://doi.org/10.34973/5afg-7r41>). Some data,  
18 such as statistical maps and brain parcels of interest were shared via the Neurovault Repository  
19 (<https://identifiers.org/neurovault.collection:7731>). Supplemental Material can be found in OSF  
20 (<https://osf.io/cq96h/>).

21 Behavioral data were analyzed by *JASP* (<https://jasp-stats.org/>). For the term-based meta-analysis of  
22 neuroimaging studies, we used the *Neurosynth* (<https://neurosynth.org/>), and *BrainMap*  
23 (<http://www.brainmap.org/>). Preprocessing of neuroimaging data was performed by *FSL*  
24 (<https://fsl.fmrib.ox.ac.uk/fsl/fslwiki>), *ICA-AROMA* (<https://github.com/maartenmennes/ICA-AROMA>),

1 and *fMRIPrep* (<https://fmriprep.readthedocs.io/en/stable/>). Python packages, including *Nilearn*  
2 (<https://nilearn.github.io/>), *Nistats* (<https://nistats.github.io/>), *Pandas* (<https://pandas.pydata.org/>), and  
3 *Numpy* (<https://numpy.org/>) were used for the analyses of time series. Machine learning algorithms were  
4 based on *scikit-learn* (<https://scikit-learn.org/>) and implemented via *Nilearn* (<https://nilearn.github.io/>).  
5 *Anaconda* (<https://www.anaconda.com/>) Python 3.6 was used as the platform for all the programming and  
6 statistical analyses. Custom Python scripts were written to perform all analyses described based on the  
7 mentioned Python packages; all code is available from the authors upon request and will be released via  
8 our OSF repository (<https://osf.io/cq96h/>) upon publication.

9

10

11

12

13

14

15

16

17

18

## 19 **References:**

20 Anderson MC (2004) Neural Systems Underlying the Suppression of Unwanted Memories. *Science* (80- ) 303:232–  
21 235 Available at: <https://www.sciencemag.org/lookup/doi/10.1126/science.1089504>.

22 Anderson MC, Green C (2001) Suppressing unwanted memories by executive control. *Nature* 410:366–369  
23 Available at: <http://www.nature.com/articles/35066572>.

- 1 Anderson MC, Hanslmayr S (2014) Neural mechanism of motivated forgetting. *Trends Cogn Sci* 18, Issue:1–14.
- 2 Andersson JLR, Jenkinson M, Smith S, others (2007) Non-linear registration aka Spatial normalisation FMRIB  
3 Technial Report TR07JA2. FMRIB Anal Gr Univ Oxford.
- 4 Arbutnott KD (2008) Asymmetric switch cost and backward inhibition: Carryover activation and inhibition in  
5 switching between tasks of unequal difficulty. *Can J Exp Psychol Can Psychol expérimentale* 62:91.
- 6 Behrens TEJ, Muller TH, Whittington JCR, Mark S, Baram AB, Stachenfeld KL, Kurth-Nelson Z (2018) What is a  
7 cognitive map? Organizing knowledge for flexible behavior. *Neuron* 100:490–509.
- 8 Bellmund JLS, Gärdenfors P, Moser EI, Doeller CF (2018) Navigating cognition: Spatial codes for human thinking.  
9 *Science* (80- ) 362.
- 10 Bode S, Haynes J-D (2009) Decoding sequential stages of task preparation in the human brain. *Neuroimage* 45:606–  
11 613.
- 12 Braver TS, Reynolds JR, Donaldson DI (2003) Neural mechanisms of transient and sustained cognitive control  
13 during task switching. *Neuron* 39:713–726.
- 14 Bunge SA, Kahn I, Wallis JD, Miller EK, Wagner AD (2003) Neural circuits subserving the retrieval and  
15 maintenance of abstract rules. *J Neurophysiol* 90:3419–3428.
- 16 Cocuzza CV, Ito T, Schultz DH, Bassett DS, Cole MW (2019) Flexible coordinator and switcher hubs for adaptive  
17 task control. *bioRxiv:822213* Available at: <https://www.biorxiv.org/content/10.1101/822213v1>.
- 18 Cohen JD, Daw N, Engelhardt B, Hasson U, Li K, Niv Y, Norman KA, Pillow J, Ramadge PJ, Turk-Browne NB,  
19 Willke TL (2017) Computational approaches to fMRI analysis. *Nat Neurosci* 20:304–313 Available at:  
20 <http://www.nature.com/doi/10.1038/nn.4499>.
- 21 Cole MW, Etzel JA, Zacks JM, Schneider W, Braver TS (2011) Rapid transfer of abstract rules to novel contexts in  
22 human lateral prefrontal cortex. *Front Hum Neurosci* 5:142.
- 23 Cole MW, Ito T, Schultz D, Mill R, Chen R, Cocuzza C (2019) Task activations produce spurious but systematic  
24 inflation of task functional connectivity estimates. *Neuroimage* 189:1–18 Available at:  
25 <https://linkinghub.elsevier.com/retrieve/pii/S1053811918322043>.
- 26 Desikan RS, Ségonne F, Fischl B, Quinn BT, Dickerson BC, Blacker D, Buckner RL, Dale AM, Maguire RP,  
27 Hyman BT, others (2006) An automated labeling system for subdividing the human cerebral cortex on MRI  
28 scans into gyral based regions of interest. *Neuroimage* 31:968–980.
- 29 Dove A, Pollmann S, Schubert T, Wiggins CJ, Von Cramon DY (2000) Prefrontal cortex activation in task switching:  
30 an event-related fMRI study. *Cogn brain Res* 9:103–109.
- 31 Duncan J (2001) An adaptive coding model of neural function in prefrontal cortex. *Nat Rev Neurosci* 2:820–829.

- 1 Duncan J (2010) The multiple-demand (MD) system of the primate brain: mental programs for intelligent behaviour.  
2 Trends Cogn Sci 14:172–179.
- 3 Etzel JA, Cole MW, Zacks JM, Kay KN, Braver TS (2016) Reward motivation enhances task coding in  
4 frontoparietal cortex. *Cereb cortex* 26:1647–1659.
- 5 Friston KJ, Holmes AP, Worsley KJ, Poline J-P, Frith CD, Frackowiak RSJ (1994) Statistical parametric maps in  
6 functional imaging: a general linear approach. *Hum Brain Mapp* 2:189–210.
- 7 Gilbert SJ (2011) Decoding the content of delayed intentions. *J Neurosci* 31:2888–2894.
- 8 Gonzalez-Castillo J, Hoy CW, Handwerker DA, Robinson ME, Buchanan LC, Saad ZS, Bandettini PA (2015)  
9 Tracking ongoing cognition in individuals using brief, whole-brain functional connectivity patterns. *Proc Natl*  
10 *Acad Sci U S A* 112:8762–8767.
- 11 Goschke T (2000) Intentional reconfiguration and J-TI involuntary persistence in task set switching. *Control Cogn*  
12 *Process Atten Perform XVIII* 18:331.
- 13 Greve DN, Fischl B (2009) Accurate and robust brain image alignment using boundary-based registration.  
14 *Neuroimage* 48:63–72.
- 15 Gruber O, Karch S, Schlueter EK, Falkai P, Goschke T (2006) Neural mechanisms of advance preparation in task  
16 switching. *Neuroimage* 31:887–895.
- 17 Guo Y, Schmitz TW, Mur M, Ferreira CS, Anderson MC (2018) A supramodal role of the basal ganglia in memory  
18 and motor inhibition: Meta-analytic evidence. *Neuropsychologia* 108:117–134 Available at:  
19 <https://doi.org/10.1016/j.neuropsychologia.2017.11.033>.
- 20 Haynes J-D (2015) A primer on pattern-based approaches to fMRI: principles, pitfalls, and perspectives. *Neuron*  
21 87:257–270.
- 22 Hermans EJ, Van Marle HJF, Ossewaarde L, Henckens MJAG, Qin S, Van Kesteren MTR, Schoots VC, Cousijn H,  
23 Rijpkema M, Oostenveld R, others (2011) Stress-related noradrenergic activity prompts large-scale neural  
24 network reconfiguration. *Science* (80- ) 334:1151–1153.
- 25 Huang P, Carlin JD, Alink A, Kriegeskorte N, Henson RN, Correia MM (2018) Prospective motion correction  
26 improves the sensitivity of fMRI pattern decoding. *Hum Brain Mapp* 39:4018–4031.
- 27 Hulbert JC, Henson RN, Anderson MC (2016) Inducing amnesia through systemic suppression. *Nat Commun*  
28 7:11003 Available at: <http://www.nature.com/articles/ncomms11003>.
- 29 Jenkinson M, Bannister P, Brady M, Smith S (2002) Improved optimization for the robust and accurate linear  
30 registration and motion correction of brain images. *Neuroimage* 17:825–841.
- 31 Jenkinson M, Beckmann CF, Behrens TEJ, Woolrich MW, Smith SM (2012) Fsl. *Neuroimage* 62:782–790.

- 1 Jenkinson M, Smith S (2001) A global optimisation method for robust affine registration of brain images. *Med*  
2 *Image Anal* 5:143–156.
- 3 Jersild AT (1927) Mental set and shift. *Arch Psychol* 14:81–86.
- 4 Jimura K, Cazalis F, Stover ERS, Poldrack RA (2014) The neural basis of task switching changes with skill  
5 acquisition. *Front Hum Neurosci* 8:339.
- 6 Kiesel A, Steinhauser M, Wendt M, Falkenstein M, Jost K, Philipp AM, Koch I (2010) Control and interference in  
7 task switching—A review. *Psychol Bull* 136:849–874 Available at:  
8 <http://doi.apa.org/getdoi.cfm?doi=10.1037/a0019842>.
- 9 Kriegeskorte N, Diedrichsen J (2019) Peeling the Onion of Brain Representations. *Annu Rev Neurosci* 42:407–432.
- 10 Laird AR, Lancaster JJ, Fox PT (2005) Brainmap. *Neuroinformatics* 3:65–77.
- 11 Levy BJ, Anderson MC (2012) Purging of Memories from Conscious Awareness Tracked in the Human Brain. *J*  
12 *Neurosci* 32:16785–16794 Available at: <http://www.jneurosci.org/cgi/doi/10.1523/JNEUROSCI.2640-12.2012>.
- 13 Lindquist MA, Geuter S, Wager TD, Caffo BS (2019) Modular preprocessing pipelines can reintroduce artifacts into  
14 fMRI data. *Hum Brain Mapp* 40:2358–2376.
- 15 Liu W, Kohn N, Fernández G (2020a) Probing the neural dynamics of mnemonic representations after the initial  
16 consolidation. *Neuroimage* 221.
- 17 Liu W, Peeters N, Fernández G, Kohn N (2020b) Common neural and transcriptional correlates of inhibitory control  
18 underlie emotion regulation and memory control. *Soc Cogn Affect Neurosci* 15.
- 19 Loose LS, Wisniewski D, Rusconi M, Goschke T, Haynes JD (2017) Switch-independent task representations in  
20 frontal and parietal cortex. *J Neurosci* 37:8033–8042.
- 21 Mary A, Dayan J, Leone G, Postel C, Fraisse F, Malle C, Vallée T, Klein-Peschanski C, Viader F, de la Sayette V,  
22 Peschanski D, Eustache F, Gagnepain P (2020) Resilience after trauma: The role of memory suppression.  
23 *Science* (80- ) 367.
- 24 Meiran N (2010) Task Switching: Mechanisms Underlying Rigid vs. Flexible Self-Control. In: *Self Control in*  
25 *Society, Mind, and Brain*, pp 202–220. Oxford University Press. Available at:  
26 [http://www.oxfordscholarship.com/view/10.1093/acprof:oso/9780195391381.001.0001/acprof-](http://www.oxfordscholarship.com/view/10.1093/acprof:oso/9780195391381.001.0001/acprof-9780195391381-chapter-11)  
27 [9780195391381-chapter-11](http://www.oxfordscholarship.com/view/10.1093/acprof:oso/9780195391381.001.0001/acprof-9780195391381-chapter-11).
- 28 Momennejad I, Haynes J-D (2013) Encoding of prospective tasks in the human prefrontal cortex under varying task  
29 loads. *J Neurosci* 33:17342–17349.
- 30 Monsell S (2003) Task switching. *Trends Cogn Sci* 7:134–140.



- 1 Mosbacher JA, Brunner C, Grabner RH (2020) More Problems After Difficult Problems? Behavioral and  
2 Electrophysiological Evidence for Sequential Difficulty Effects in Mental Arithmetic. *J Numer Cogn* 6:108–  
3 128.
- 4 Peer M, Brunec IK, Newcombe NS, Epstein RA (2020) Structuring Knowledge with Cognitive Maps and Cognitive  
5 Graphs. *Trends Cogn Sci*.
- 6 Power JD, Barnes KA, Snyder AZ, Schlaggar BL, Petersen SE (2012) Spurious but systematic correlations in  
7 functional connectivity MRI networks arise from subject motion. *Neuroimage* 59:2142–2154.
- 8 Pruim RHR, Mennes M, van Rooij D, Llera A, Buitelaar JK, Beckmann CF (2015) ICA-AROMA: a robust ICA-  
9 based strategy for removing motion artifacts from fMRI data. *Neuroimage* 112:267–277.
- 10 Reverberi C, Görgen K, Haynes J-D (2012) Compositionality of rule representations in human prefrontal cortex.  
11 *Cereb cortex* 22:1237–1246.
- 12 Richter FR, Yeung N (2014) *Neuroimaging studies of task switching*. Oxford University Press Oxford, England.
- 13 Roelofs J, van Breukelen G, de Graaf LE, Beck AT, Arntz A, Huibers MJH (2013) Norms for the Beck Depression  
14 Inventory (BDI-II) in a large Dutch community sample. *J Psychopathol Behav Assess* 35:93–98.
- 15 Rogers RD, Monsell S (1995) Costs of a predictable switch between simple cognitive tasks. *J Exp Psychol Gen*  
16 124:207–231.
- 17 Ruge H, Jamadar S, Zimmermann U, Karayanidis F (2013) The many faces of preparatory control in task switching:  
18 reviewing a decade of fMRI research. *Hum Brain Mapp* 34:12–35.
- 19 Rugg MD, Vilberg KL (2013) Brain networks underlying episodic memory retrieval. *Curr Opin Neurobiol* 23:255–  
20 260.
- 21 Sadaghiani S, Poline J-B, Kleinschmidt A, D’Esposito M (2015) Ongoing dynamics in large-scale functional  
22 connectivity predict perception. *Proc Natl Acad Sci* 112:8463–8468 Available at:  
23 <http://www.pnas.org/lookup/doi/10.1073/pnas.1420687112>.
- 24 Sakai K, Passingham RE (2003) Prefrontal interactions reflect future task operations. *Nat Neurosci* 6:75–81.
- 25 Schaefer A, Kong R, Gordon EM, Laumann TO, Zuo X-N, Holmes AJ, Eickhoff SB, Yeo BTT (2018) Local-Global  
26 Parcellation of the Human Cerebral Cortex from Intrinsic Functional Connectivity MRI. *Cereb Cortex*  
27 28:3095–3114 Available at: <https://academic.oup.com/cercor/article/28/9/3095/3978804>.
- 28 Schneider DW, Anderson JR (2010) Asymmetric switch costs as sequential difficulty effects. *Q J Exp Psychol*  
29 63:1873–1894.

- 1 Schultz DH, Cole MW (2016) Higher Intelligence Is Associated with Less Task-Related Brain Network  
2 Reconfiguration. *J Neurosci* 36:8551–8561 Available at:  
3 <http://www.jneurosci.org/lookup/doi/10.1523/JNEUROSCI.0358-16.2016>.
- 4 Shine JM, Bissett PG, Bell PT, Koyejo O, Balsters JH, Gorgolewski KJ, Moodie CA, Poldrack RA (2016) The  
5 Dynamics of Functional Brain Networks: Integrated Network States during Cognitive Task Performance.  
6 *Neuron* 92:544–554 Available at: <http://dx.doi.org/10.1016/j.neuron.2016.09.018>.
- 7 Shine JM, Hearne LJ, Breakspear M, Hwang K, Müller EJ, Sporns O, Poldrack RA, Mattingley JB, Cocchi L (2019)  
8 The Low-Dimensional Neural Architecture of Cognitive Complexity Is Related to Activity in Medial Thalamic  
9 Nuclei. *Neuron* 104:849-855.e3.
- 10 Shine JM, Poldrack RA (2018) Principles of dynamic network reconfiguration across diverse brain states.  
11 *Neuroimage* 180:396–405 Available at: <https://linkinghub.elsevier.com/retrieve/pii/S1053811917306572>.
- 12 Siegel JS, Mitra A, Laumann TO, Seitzman BA, Raichle M, Corbetta M, Snyder AZ (2017) Data quality influences  
13 observed links between functional connectivity and behavior. *Cereb cortex* 27:4492–4502.
- 14 Smith SM (2002) Fast robust automated brain extraction. *Hum Brain Mapp* 17:143–155.
- 15 Spector A, Biederman I (1976) Mental set and mental shift revisited. *Am J Psychol*:669–679.
- 16 Todd MT, Nystrom LE, Cohen JD (2013) NeuroImage Confounds in multivariate pattern analysis □: Theory and rule  
17 representation case study. *Neuroimage* 77:157–165 Available at:  
18 <http://dx.doi.org/10.1016/j.neuroimage.2013.03.039>.
- 19 van der Bij AK, de Weerd S, Cikot RJLM, Steegers EAP, Braspenning JCC (2003) Validation of the dutch short  
20 form of the state scale of the Spielberger State-Trait Anxiety Inventory: considerations for usage in screening  
21 outcomes. *Public Health Genomics* 6:84–87.
- 22 Waskom ML, Kumaran D, Gordon AM, Rissman J, Wagner AD (2014) Frontoparietal representations of task  
23 context support the flexible control of goal-directed cognition. *J Neurosci* 34:10743–10755.
- 24 Westphal AJ, Wang S, Rissman J (2017) Episodic memory retrieval benefits from a less modular brain network  
25 organization. *J Neurosci* 37:3523–3531.
- 26 Wisniewski D, Goschke T, Haynes J-D (2016) Similar coding of freely chosen and externally cued intentions in a  
27 fronto-parietal network. *Neuroimage* 134:450–458.
- 28 Wisniewski D, Reverberi C, Tusche A, Haynes J-D (2015) The neural representation of voluntary task-set selection  
29 in dynamic environments. *Cereb Cortex* 25:4715–4726.
- 30 Woolgar A, Afshar S, Williams MA, Rich AN (2015) Flexible coding of task rules in frontoparietal cortex: an  
31 adaptive system for flexible cognitive control. *J Cogn Neurosci* 27:1895–1911.

- 1 Woolgar A, Thompson R, Bor D, Duncan J (2011) Multi-voxel coding of stimuli, rules, and responses in human  
2 frontoparietal cortex. *Neuroimage* 56:744–752.
- 3 Woolrich MW, Ripley BD, Brady M, Smith SM (2001) Temporal autocorrelation in univariate linear modeling of  
4 fMRI data. *Neuroimage* 14:1370–1386.
- 5 Yang W, Zhuang K, Liu P, Guo Y, Chen Q, Wei D, Qiu J (2021) Memory Suppression Ability can be Robustly  
6 Predicted by the Internetwork Communication of Frontoparietal Control Network. *Cereb Cortex*.
- 7 Yarkoni T, Poldrack RA, Nichols TE, Van Essen DC, Wager TD (2011) Large-scale automated synthesis of human  
8 functional neuroimaging data. *Nat Methods* 8:665.
- 9 Yeo BTT, Krienen FM, Sepulcre J, Sabuncu MR, Lashkari D, Hollinshead M, Roffman JL, Smoller JW, Zöllei L,  
10 Polimeni JR, others (2011) The organization of the human cerebral cortex estimated by intrinsic functional  
11 connectivity. *J Neurophysiol* 106:1125.
- 12 Zhang J, Kriegeskorte N, Carlin JD, Rowe JB (2013) Choosing the rules: distinct and overlapping frontoparietal  
13 representations of task rules for perceptual decisions. *J Neurosci* 33:11852–11862.
- 14
- 15
